# Supplementary material for: Giant polyketide synthase enzymes biosynthesize a giant marine polyether biotoxin
Source: PubMed Central journal article supplement — bioRxiv. 2024 Jan 31:2024.01.29.577497. Preprint. [Version 1] doi: 10.1101/2024.01.29.577497 (PMC10862718; doi:10.1101/2024.01.29.577497), 2024-01-31
Supplement: media-1.pdf [file media-1.pdf]

1  
2  
3  
4  
5  
6  
7  
8  
9  
10  
11  
12  
13  
14  
15  
16  
17

## Supplementary for

Giant polyketide synthase enzymes biosynthesize a giant marine polyether biotoxin.

Timothy R. Fallon<sup>1\*</sup>, Vikram V. Shende<sup>1</sup>, Igor H. Wierzbicki<sup>2</sup>, Robert P. Auber<sup>3,4</sup>, David J. Gonzalez<sup>2,5</sup>,  
Jennifer H. Wisecaver<sup>3,4</sup>, Bradley S. Moore<sup>1,5\*</sup>

<sup>1</sup>Center for Marine Biotechnology and Biomedicine, Scripps Institution of Oceanography and University of California, San Diego; 9500 Gilman Dr #0204, La Jolla, CA 92093, USA.

<sup>2</sup>Department of Pharmacology, University of California, San Diego; 9500 Gilman Dr, La Jolla, CA 92093, USA.

<sup>3</sup>Department of Biochemistry, Purdue University; 175 S University St, West Lafayette, IN 47907, USA.

<sup>4</sup>Purdue Center for Plant Biology, Purdue University; 175 S University St, West Lafayette, IN 47907, USA.

<sup>5</sup>Skaggs School of Pharmacy and Pharmaceutical Sciences, University of California, San Diego; 9500 Gilman Dr, La Jolla, CA 92093, USA.

\*Corresponding author. Email: tfallon@ucsd.edu (TRF); Email: bsmoore@ucsd.edu (BSM)

## 18 **Materials and Methods**

### 19 **Cell strains:**

20 The haploid *Prymnesium parvum* strain 12B1 (48) was a gift of Dr. William Driscoll (Pennsylvania State  
21 University, Harrisburg). Strain 12B1 is available from the UTEX Culture Collection of Algae at UT-Austin  
22 under UTEX accession UTEX LB 3227.

### 24 **Media preparation:**

#### 25 For proteomic mass spectrometry:

26 L1-Si@25 (25% salinity) algal growth media (49) was prepared from 12L of 18.2 Mohm·cm water  
27 (ultrapure water) dispensed from a laboratory water purifier [Millipore, Milli-Q Advantage A10, CAT#  
28 Z00Q0V0WW], 4L seawater [Scripps Institution of Oceanography seawater system], concentrated  
29 stocks for L1 media [National Center for Marine Algae, CAT# MKL150L] and 1.5 mM NaHCO<sub>3</sub> to adjust  
30 for the lack of carbon from seawater, all within a polycarbonate 20L carboy [Thermo Fisher Scientific,  
31 CAT# 2251-0050]. The carboy was then capped with a 3-port closure [Thermo Fisher Scientific, CAT#  
32 2162-0831] plus pre-installed interior 6" and 30" silicone tubing. Two of the three ports were temporarily  
33 blocked for autoclaving, while the third port was interfaced with a small piece of silicone tubing and a  
34 Whatman HEPA-VENT disk filter [Cytiva, CAT# 6723-5000]. The vented carboy was autoclaved using  
35 the "Cycle 3 LIQUID 60 MIN" in a Beta Star Medium Sterilizer Series autoclave.

#### 37 For rRNA depletion RNA-Seq:

38 A similar method was used to above, excepting media preparation was scaled down to 8L in a single  
39 9L bottle [Corning, CAT# 1596-9L] & it was autoclaved in a Hirayama HV-50 autoclave at 121°C for 60  
40 minutes, with the 0% exhaust setting.

### 42 **Creation of v1.1 *P. parvum* 12B1 reference genome by targeted reassembly:**

43 Previously published (20) Oxford Nanopore Technology (ONT) MinION genomic DNA reads [# of reads:  
44 447907, # of nucleotides: 4005418850, filename:12B1\_above\_3kb\_nanopore\_sorted.bam, checksum:  
45 seqkit.v0.1\_DLS\_k0\_9c68687a7acb147c412be4b83753e237, SRA:SRR18033808] were aligned  
46 against an unpublished intermediate version v0.3 of the 12B1 reference genome assembly  
47 [12B1\_scaffolds\_v0.3.fasta ; checksum: seqkit.v0.1\_DLS\_k0\_6561035ed292bc5039428c769267f70b]  
48 using the NGMLR aligner (50). A suspicious region [v1.0:12B1-Scaf17:2286312-2287047] of the  
49 PKZILLA-1 N-terminus that showed increased coverage, a higher proportion of visible single nucleotide  
50 variation (SNV), and a high proportion of a large indel was noted through graphical inspection with  
51 Integrated Genomics Viewer v2.14 (51). ONT gDNA reads intersecting this suspicious PKZILLA-1 N-  
52 terminal region, were extracted using "bedtools intersect" (52). The extracted reads [# of reads: 41, #  
53 of nucleotides: 475352, filename: suspicious\_hotspot1@2500bp\_N-term\_region.bam, checksum:  
54 seqkit.v0.1\_DLS\_k0\_d202591ca9f50940752c50f50395048e], were then assembled using Flye  
55 (v2.9.2-b1786), using a parameter scan from 100-10000 for the "--min-overlap" parameter, and  
56 inclusion of the "--keep-haplotypes --meta --scaffold" parameters. The source code of Flye had been  
57 patched to allow for values of <1000 for the "--min-overlap" parameter. The resulting 29 targeted  
58 assemblies all consisted of only a single contig, of which there were only 5 unique sequences across  
59 the 29 assemblies. Next, the PKZILLA-1 gene model was partially lifted over to each of the 5 unique  
60 targeted reassembly contigs using the flo pipeline (<https://github.com/wurmlab/flo>) (53), which uses the  
61 ucsc-kent tools (<http://hgdownload.cse.ucsc.edu/admin/exe/>), blat (54), GNU parallel (55), and  
62 genomertools (56) internally. The translated peptide and nucleotide representations of the lifted-over  
63 PKZILLA-1 N-terminal 1<sup>st</sup> exon, were extracted using a custom Nextflow (57) workflow  
64 ([https://github.com/photocyte/PPYR\\_OGS/blob/master/utility\\_scripts/extract\\_gff\\_features.nf](https://github.com/photocyte/PPYR_OGS/blob/master/utility_scripts/extract_gff_features.nf)). These  
65 peptide and nucleotide representations of the lifted over PKZILLA-1 features were identical across the  
66 5 unique contigs, so a random representative selection was made for downstream analyses. These

67 representative peptide & nucleotide representations of the lifted 1<sup>st</sup> exon were next aligned against the  
68 analogous extractions of the reference 1<sup>st</sup> exon using kalign2 (58), and these multiple sequence  
69 alignments were manually inspected with mview (59). This analysis revealed a 609 bp tandem repetitive  
70 region that was missing from the reference assembly, but also revealed that the targeted re-assembly  
71 was otherwise identical to the reference assembly (excepting a single upstream homopolymer indel,  
72 that is not unusual with unpolished Nanopore assemblies & was ignored in further downstream  
73 analyses). The v1.1 version of the 12B1 assembly [filename: 12B1\_scaffolds\_v1.1.fasta ; checksum:  
74 seqkit.v0.1\_DLS\_k0\_99243f7852f0aa7f150e6169739e61a0] was then constructed by adding the 609  
75 bp region with the 'replace' subcommand of seqkit, targeting the replacement to its homologous loci on  
76 scaffold 12B1-Scaf17 of the v1.0 genome, as determined by kalign2. This 12B1 genome assembly v1.1  
77 is available on Zenodo (doi:[10.5281/zenodo.10023322](https://doi.org/10.5281/zenodo.10023322)).

### 79 ***P. parvum* growth and harvesting for rRNA depletion RNA-Seq:**

80 *P. parvum* strain 12B1 was grown within 125 mL borosilicate glass Erlenmeyer flasks in 50 mL of L1-  
81 Si@25 media. Mouths of the flasks were sealed against contamination using 10 cm x 10 cm squares  
82 of air-permeable and sterilizable cellulose-polyester wrapping paper [Cardinal Health, CAT# 4008] that  
83 was sealed around the neck of the flask using rubber bands. Before use, the flasks including mouth  
84 seal & rubber bands were sterilized and cleaned by autoclaving with 75 mL of ultrapure water. This  
85 water was removed before addition of the L1-Si@25 media & seeding of the *P. parvum* culture. Post-  
86 autoclave manipulations of the flasks took place in a Type II Biosafety Cabinet. Ongoing culturing of  
87 the flasks took place in a 22°C incubator [Fisher Scientific, CAT# 146E] retrofit with full spectrum LED  
88 grow lights [GE Lighting, BR30, CAT# 93101230], corresponding to ~2200 lux from above under a  
89 14:10 light:dark cycle. Routine cell concentration measurements were recorded with a Muse flow  
90 cytometer [Luminex, CAT# 0500-3115]. The day phase cells were harvested 3 hours after the light to  
91 dark transition and a concentration of ~378e3 cells/mL. The night phase cells were harvested 3 hours  
92 after the dark to light transition and a concentration of 559e3 cells/mL. Harvesting occurred by  
93 transferring the flask content to a 50 mL polypropylene (PP) centrifuge tube (CFT) and centrifuging with  
94 a swinging bucket centrifuge [Beckman, CAT# X-15R], with parameters: 3000×g, 10 minutes, 18°C,  
95 accel=MAX, decel=MAX. The supernatant was removed by decanting, and the cell pellet resuspended  
96 in the remaining adherent liquid with a P1000 pipette. The cell suspension was transferred to a 2 mL  
97 PP microcentrifuge tube (MCT), and 1000 µL plus 400 µL of 4°C TRIzol Reagent [Invitrogen, CAT#  
98 1559026] were added in quick succession. Post-TRIzol addition, samples were stored at -80°C for less  
99 than a week.

### 101 **RNA extraction and rRNA depletion RNA-Seq:**

102 TRIzol-stored cell samples (see “*P. parvum* growth and harvesting for rRNA depletion RNA-Seq”  
103 methods) were removed from the -80°C and 280 µL of 24:1 chloroform:isoamyl alcohol [Acros Organics,  
104 CAT#327155000] was added. Samples were manually mixed by inversion for ~1 minute, and then  
105 centrifuged in a fixed angle centrifuge at 24,000×g for 10 minutes. The upper aqueous layer was  
106 transferred to a new 2 mL PP MCT and 1 mL of 100% ethanol (denatured) was added. Total RNA was  
107 purified from the resulting mixture using chaotropic silica column nucleic acid purification with a  
108 commercial kit [Zymo Research, RNA Clean & Concentrator-25, CAT# R1017], following the  
109 manufacturer's instructions (60). The day and night phase samples yielded 632 ng and 1177 ng of  
110 RNA, respectively. These samples were stored at -80°C for less than a week. The ppMCTs containing  
111 purified RNA were then transported to the UCSD Institute for Genomic Medicine (IGM) genomics core  
112 facility on dry ice and stored at -80°C until use. The samples were prepared into deoxyuridine  
113 triphosphate (dUTP)-stranded sequencing libraries by the IGM, using a commercially available kit  
114 [Illumina, TruSeq Stranded Total RNA with Ribo-Zero Plant, CAT# 20020610], following the  
115 manufacturer's instructions. Libraries were sequenced at IGM on a NovaSeq 6000 sequencer [Illumina]  
116 using the paired-end mode. Libraries were sequenced over 4 separate NovaSeq runs to increase

117 coverage. Libraries were split across an unknown number of physical flowcell lanes. Libraries were  
118 multiplexed within lanes with an unknown type and number of other samples. Raw RNA-Seq reads are  
119 available on NCBI SRA with Bioproject: PRJNA936443, with SRA accessions SRR23517916 (night)  
120 and SRR23517917 (day).

### 121 **RNA-Seq alignment, reference guided transcriptome assembly, and quantification:**

122 rRNA depletion RNA-Seq reads were trimmed using trimmomatic v0.39 (61) with parameters  
123 "ILLUMINACLIP:adapters.fa:2:30:10 SLIDINGWINDOW:4:5 LEADING:5 TRAILING:5 MINLEN:25"  
124 and aligned to an unpublished intermediate version v0.3 of the 12B1 reference assembly  
125 [12B1\_scaffolds\_v0.3.fasta ; checksum: seqkit.v0.1\_DLS\_k0\_6561035ed292bc5039428c769267f70b]  
126 with hisat2 v2.2.1 (62) using parameters "--rna-strandness R --fr --no-mixed --no-discordant --max-  
127 intronlen 3000". Reads from the day and night phase samples were merged, and the merged reads  
128 were then assembled into transcripts using stringtie v2.2.1 with parameters "--rf" (63). Poly-A pulldown  
129 (SRR1685644)(23) and rRNA depletion RNA-Seq reads shown in figures were re-aligned against the  
130 12B1 v1.1 assembly using the same programs (hisat2) and parameters, excepting the changed  
131 parameter "--max-intronlen 5000". RNA-Seq was independently quantified against the 12B1 v1.1 gene-  
132 model annotation predicted transcripts (doi:[10.5281/zenodo.10023330](https://doi.org/10.5281/zenodo.10023330)) using the rRNA depletion day  
133 phase (SRR23517917) and night phase (SRR23517916) samples with Kallisto v0.50.0 with parameters  
134 "--rf-stranded". Kallisto results are available on Zenodo (doi:[10.5281/zenodo.10023426](https://doi.org/10.5281/zenodo.10023426)).

### 136 **Definition of PKS hotspots within the 12B1 genome**

137 The *P. parvum* 12B1 PKS hotspots were originally defined off the unpublished intermediate versions  
138 v0.3 of the 12B1 reference assembly and gene annotation. First, PKS domain polypeptide sequences  
139 from *P. parvum* 12B1 were selected by analyzing the TSV format InterProScan (25) results produced  
140 from the gene-model derived polypeptides as described in (20), and, selecting using bedtools and  
141 seqkit, those polypeptide regions that received the InterPro annotation [IPR016039](https://doi.org/10.5281/zenodo.10023330), [IPR036736](https://doi.org/10.5281/zenodo.10023330),  
142 [IPR036291](https://doi.org/10.5281/zenodo.10023330), [IPR042104](https://doi.org/10.5281/zenodo.10023330) or [IPR020807](https://doi.org/10.5281/zenodo.10023330), [IPR029063](https://doi.org/10.5281/zenodo.10023330), and [IPR020843](https://doi.org/10.5281/zenodo.10023330)  
143 matches for the ketosynthase (KS), acyl-carrier-protein (ACP), ketoreductase (KR), dehydratase (DH), SAM methyltransferase (MT),  
144 and enoyl-reductase (ER) domains, respectively. The polypeptide sequences of these selected  
145 domains were then used as a tblastn query against the v0.3 12B1 genomic assembly, using parameters  
146 "-outfmt 5 -evalue 0.001". The blast XML results were converted to GFF using a custom script  
147 ([https://github.com/photocyte/general\\_scripts/blob/master/blastxml2gff.py](https://github.com/photocyte/general_scripts/blob/master/blastxml2gff.py)). Next, overlapping and  
148 redundant tblastn hits on the same strand were collapsed using 'bedtools merge -s'. These bed  
149 alignments, representing same-strand coding evidence for PKS domains, were clustered into "hotspots"  
150 i.e. regions with evidence of PKS coding sequence without explicit hypotheses as to the gene model  
151 structures, via merging adjacent alignments through 'bedtools slop -b' and 'bedtools merge'. The  
152 bedtools slop -b parameter was iterated over a range of values, and 5000 bp was determined as the  
153 most interpretable where each hotspot likely arose from 1 gene. These v0.3 assembly and annotation  
154 derived hotspots were lifted over to the v1.1 assembly without issue using seqkit and bedtools, and are  
155 available on Zenodo (doi:[10.5281/zenodo.10309063](https://doi.org/10.5281/zenodo.10309063)).

### 157 **Construction of PKZILLA gene models:**

158 The construction of the PKZILLA gene models was originally based off an unpublished intermediate  
159 version v0.3 of the 12B1 reference assembly. Supervised gene models for the PKZILLAs were  
160 constructed by joining or extending predicted exons from the hisat2/stringtie RNA-Seq alignment and  
161 reference guided transcriptome assembly (see "RNA-Seq alignment, reference guided transcriptome  
162 assembly, and quantification" methods section), with exons from *ab initio* gene models that were  
163 generated as previously described (20) but based off an unpublished intermediate version v0.3 of the  
164 12B1 reference assembly. For additional guiding evidence, splice-aware protein to genome alignments  
165 of PKS protein domains sourced from the *P. parvum* 12B1 gene annotation (20) were produced with a



167 pre-search using tblastn from BLAST+ v2.13.0 (64) with the following parameters: "-threshold 13 -  
168 word\_size 2 -max\_intron\_length 1000 -outfmt '6 sseqid slen sstart send qseqid qlen qstart qend pident  
169 length evaluate score' -evaluate 0.01", followed by an intron-aware alignment using the prot2genome utility  
170 "funannotate-p2g.py", with parameters "--maxintron 500 --exonerate\_pident 10" from v1.8.14 of the  
171 funannotate genome annotation software (65). Funannotate-p2g.py calls exonerate v2.4.0 (66)  
172 internally. Evidence for potential introns was created using the "hints.BAM.gff" file generated by  
173 funannotate v1.8.14 from the hisat2 aligned reads (see "RNA-Seq alignment, reference guided  
174 transcriptome assembly, and quantification" methods). Notably, we found that the coding regions of  
175 the presumed PKZILLAs were flagged as repeats by the repeatmasking process used to generate the  
176 *ab initio* gene models, thus our decision to perform a supervised gene-model construction based on  
177 protein-alignments and RNA-seq alignments. This combined evidence was viewed as tracks against  
178 the genomic assembly in Integrated Genomics Viewer (IGV) v2.14 (51). The PKZILLA gene models (in  
179 GFF format) were then iteratively edited with a text editor, with iterative inspection in IGV confirming  
180 compatibility with the evidence. As visibility of features in IGV was sensitive to their exact ordering in  
181 the GFF file, GFF files were validated for correctness and double sorted with genomertools and igvtools  
182 before viewing, using a custom Nextflow script  
183 ([https://github.com/photocyte/PPYR\\_OGS/blob/master/utility\\_scripts/doubleSort.nf](https://github.com/photocyte/PPYR_OGS/blob/master/utility_scripts/doubleSort.nf)). After the tracks  
184 were validated, features sequences (i.e. gene, mRNA, CDS, polypeptides) were extracted using a  
185 custom Nextflow script  
186 ([https://github.com/photocyte/PPYR\\_OGS/blob/master/utility\\_scripts/extract\\_gff\\_features.nf](https://github.com/photocyte/PPYR_OGS/blob/master/utility_scripts/extract_gff_features.nf)).

### 187 **Integration of PKZILLA gene models into the reference 12B1 v1.1 gene annotation:**

188 As the PKZILLA gene models were originally based off an unpublished intermediate version v0.3 of the  
189 12B1 reference assembly (see "Construction of PKZILLA gene models" methods), it was necessary to  
190 integrate the PKZILLA gene models into a reference gene model annotation based off the v1.1 genome  
191 assembly (see "Creation of v1.1 *P. parvum* 12B1 reference genome by targeted reassembly" methods).  
192 Only scaffolds 12B1-Scaf8 and 12B1-Scaf32 changed between genome assembly version v0.3 used  
193 for PKZILLA model creation (see "Construction of PKZILLA gene models" methods section) and the  
194 published genome assembly version v1.0 [12B1\_scaffolds\_v1.fasta ;  
195 seqkit.v0.1\_DLS\_k0\_25524daa93426ca36fa6f688345c06d0] (20). As described in the "Creation of  
196 v1.1 *P. parvum* 12B1 reference genome by targeted reassembly" methods section, scaffold 12B1-  
197 Scaf17 v1.0 was modified to produce genome assembly v1.1 [12B1\_scaffolds\_v1.1.fasta ;  
198 seqkit.v0.1\_DLS\_k0\_99243f7852f0aa7f150e6169739e61a0]. non-PKZILLA-1 v1.0 gene models on the  
199 modified 12B1-Scaf17 were lifted over using the flo pipeline (<https://github.com/wurmlab/flo>) (53), which  
200 uses the ucsc-kent tools (<http://hgdownload.cse.ucsc.edu/admin/exe/>), blat (54), GNU parallel (55), and  
201 genomertools (56) internally. Comparisons of extracted feature sequences (i.e. gene, mRNA, CDS,  
202 polypeptides), produced using a custom Nextflow (57) workflow  
203 ([https://github.com/photocyte/PPYR\\_OGS/blob/master/utility\\_scripts/extract\\_gff\\_features.nf](https://github.com/photocyte/PPYR_OGS/blob/master/utility_scripts/extract_gff_features.nf)), from the  
204 v1.0 and v1.1 gene models confirmed they were successfully lifted over without fragmentation. Next,  
205 PKZILLA-1 was aligned and lifted over from v0.3 to the v1.1 assembly using the flo pipeline as  
206 described above. Given the lack of changes on the PKZILLA-2 and -3 containing scaffolds, 12B1-Scaf7  
207 and 12B1-Scaf10 respectively, between genome assembly versions v0.3 and v1.1, PKZILLA-2 and -3  
208 were directly lifted over to the v1.1 assembly via concatenation of the GFF files. Fragmented gene  
209 models from the v1.0 annotation which overlapped with the lifted over PKZILLA gene models, were  
210 removed using bedtools subtract. The identifiers for the removed gene models are available as  
211 'all.remove.list.sorted.txt' on Zenodo (doi:[10.5281/zenodo.10023330](https://doi.org/10.5281/zenodo.10023330)). In total, 25 gene models were  
212 removed. Successful liftover of the PKZILLA gene models was validated by graphical inspection using  
213 Integrated Genomics Viewer v2.16 (51) and by comparison of seqkit sum hashes of the extracted  
214 sequence features. The resulting GFF file of the v1.1 gene models is available as '12B1\_v1.1.gff3' on  
215 Zenodo (doi:[10.5281/zenodo.10023330](https://doi.org/10.5281/zenodo.10023330)). The extracted sequence features (gene, mRNA, translated  
216

polypeptide, individual translated CDSs, individual exons, individual introns, etc.), were extracted using a custom Nextflow script ([https://github.com/photocyte/PPYR\\_OGS/blob/master/utility\\_scripts/extract\\_gff\\_features.nf](https://github.com/photocyte/PPYR_OGS/blob/master/utility_scripts/extract_gff_features.nf)) that used genomertools (56) internally. These extracted v1.1 assembly & v1.1 annotation sequence features are available on Zenodo (doi:[10.5281/zenodo.10023330](https://doi.org/10.5281/zenodo.10023330)).

### ***P. parvum* growth, harvesting, and lyophilization for proteomic mass spectrometry:**

*Prymnesium parvum* strain 12B1 were grown in a semi-continuous batch format, i.e. removing a subset of culture at late-exponential to early-stationary phase and diluting the remaining culture with fresh media. *P. parvum* were grown on the laboratory benchtop in a 20L polycarbonate carboy [Thermo Fisher Scientific, CAT# 2251-0050] with media prepared as described in the “Media preparation for proteomic mass spectrometry” methods and under a 14:10 light:dark cycle with ~3200 lux from above (measured at shoulder of carboy) from full spectrum LED grow lights [SpiderFarmer, CAT# SF1000], ambient laboratory temperature control (~18-20°C), and 6 liters per minute (LPM) of aeration with laboratory pressurized air. Air was delivered below the water surface via the interior 6” silicone tubing attached to a 10 mL glass pipette [Fisher Scientific, CAT# 13-678-27F]. The interior 30” silicone tubing remained coiled below the water surface and was used for daily culture sampling (1 mL) using a pipette controller [Corning, CAT# 4099], large scale culture harvesting (1L+) using a peristaltic pump, and addition of fresh autoclaved media using a peristaltic pump. Daily cell concentration measurements were recorded with a Muse flow cytometer [Luminex, CAT# 0500-3115]. For proteomics, cells were harvested at a concentration of 400,000 cells / mL via two rounds of 500 mL centrifugation with parameters: 3500×g, 10 minutes, accel=5, decel=5, temperature=18°C, in 500 mL polypropylene centrifuge tubes (CFTs) [Corning, CAT# 431123] using a X-14R swinging bucket centrifuge [Beckman Coulter, CAT# A99465]. The centrifugation also used a blue adapter sleeve [Beckman Coulter, CAT# 349846], a gray conical adaptor base [Beckman Coulter], and a compatible rotor and buckets [Beckman Coulter, CAT# SX4750A]. Cell concentration measurements of the supernatant indicated a 54% harvesting efficiency. The pelleted cell mass was flash frozen with liquid N<sub>2</sub> inside the 500 mL CFTs and lyophilized for >48 hours using a nominally -103°C, 12 mTorr lyophilizer [SP Industries, CAT# 4KBTZL-105], backed by a rotary vane vacuum pump [Edwards, CAT# RV5]. Four 500 mL CFTs were lyophilized at a time in a single Multi-Tainer container [FTS Systems]. Next, the 500 mL CFTs were placed on dry ice, and the lyophilized cell mass was scraped using a spatula/scoopula into a dry-ice cooled 50 mL polypropylene CFT [Corning, CAT# 352070], and stored long-term at -80°C.

### **Sample preparation for proteomic mass spectrometry:**

#### Preparation of proteomic subsample:

A 50 mL CFT containing lyophilized *P. parvum* 12B1 biomass (see “*P. parvum* growth, harvesting and lyophilization for proteomic mass spectrometry” method) was removed from the -80°C and allowed to equilibrate to room temperature under lyophilizer vacuum. A 4.8 mg sample of lyophilized biomass was removed using a spatula, transferred into a 1.5 mL polypropylene microcentrifuge tube (ppMCT), & had its mass measured using an analytical balance [Sartorius, CAT# CPA124S]. The ppMCT containing sample was then transported to the UCSD Collaborative Center for Multiplexed Proteomics (CCMP) proteomics core facility on dry ice and stored at -80°C until use.

#### Cell lysis, reduction, and alkylation:

The sample was next suspended in 500 µL of Lysis buffer (6M urea, 7% SDS, 50 mM tetraethylammonium bicarbonate (TEAB) [Sigma-Aldrich, CAT# T7408-500ML], pH 7.7 adjusted with phosphoric acid) supplemented with 4-(2-aminoethyl)benzenesulfonyl fluoride (AEBSF) and phenylmethylsulfonyl fluoride (PMSF) containing cOmplete ULTRA Mini Tablets, EDTA-free (½ tablet for 10 mL of buffer) [Roche, CAT# 05892791001] protease inhibitors, and PhosSTOP (½ tablet for 10 mL of buffer) [Roche, CAT# 4906845001] phosphatase inhibitors. Greater than typical quantities of

267 biomass were used as input into the method to maximize sensitivity, thus non-solubilized material was  
268 still present in the tube after addition of lysis buffer. Next, sedimented non-solubilized material was  
269 removed via pipette aspiration (~50  $\mu$ L) and the remaining cell suspension transferred to a 2 mL Protein  
270 LoBind Tube [Eppendorf, CAT# 022431102] ppMCT. The sample was mixed for 10 minutes in a Vortex  
271 Genie 2 vortex mixer [Scientific Industries, CAT# 00-SI-0236] and sonicated using Qsonica Sonicator  
272 Q125 [Qsonica, CAT# Q125-110] equipped with a 1.6 mm microtip probe [Qsonica, CAT# 4417] with  
273 the following parameters: amplitude 20; 1 second pulse; 5 second break; 5 pulses. The lysate was  
274 centrifuged for 5 minutes at 16,000 $\times$ g, room temperature (RT), and 250  $\mu$ L of the supernatant was  
275 transferred into a new 2 mL Protein LoBind Tube. The sample was then chemically reduced by addition  
276 of 5  $\mu$ L 0.5 M dithiothreitol (DTT) (9.8 mM final concentration) [Invitrogen, CAT# 15508-013] (prepared  
277 in a HPLC-grade water [Fisher Chemical, CAT# W5-4]), and incubated for 30 minutes at 47°C. Next,  
278 the sample was cooled on ice for 5 minutes and the solubilized proteins were alkylated by addition of  
279 15  $\mu$ L 0.5 M iodoacetamide (IAA) (27.8 mM final concentration) [Sigma-Aldrich, CAT# I1149] (prepared  
280 in a HPLC-grade water) with incubation for 45 minutes at RT in the dark. The alkylation reaction was  
281 quenched by addition of 5  $\mu$ L 0.5 M DTT (9.09 mM final concentration) and incubated for 15 minutes at  
282 RT. The sample was centrifuged for 5 minutes at 16,000 $\times$ g, RT, and the resulting supernatant  
283 containing solubilized chemically reduced and alkylated proteins was transferred into a new 2 mL  
284 Protein LoBind Tube.

#### 285 Protein digestion:

287 The protein sample (~275  $\mu$ L) was next acidified with 27  $\mu$ L of 12% phosphoric acid (final concentration:  
288 ~100 mM) [Sigma-Aldrich, CAT# 49685-500ML] and mixed with 1500  $\mu$ L of Binding buffer (90%  
289 methanol [Fisher Chemicals, CAT# A452-4], 50 mM TEAB, pH 7.1 adjusted with phosphoric acid). The  
290 acidified sample was loaded onto an SDS binding S-Trap mini column [ProtiFi, CAT# C02-mini-80] and  
291 centrifuged for 1 minute at 1000 $\times$ g, RT. The column was washed 5 times with 500  $\mu$ L of Binding buffer  
292 with 1 minute centrifugation at 1000 $\times$ g, RT, per each wash. The column was centrifuged for an  
293 additional 2 minutes at 2000 $\times$ g, RT, to remove residual methanol. Next, the column was transferred  
294 into a new ppMCT collection tube (provided with the S-Trap mini columns) and prepared for on-column  
295 digestion by addition of 10  $\mu$ g (20  $\mu$ L) of Sequencing Grade Modified Trypsin [Promega, CAT# V5113]  
296 and 105  $\mu$ L of 50 mM TEAB. The column was briefly centrifuged (<2000 $\times$ g), and the resulting flow-  
297 through reapplied onto the column. Next, the proteins were on-column trypsin digested for 3 hours at  
298 47°C. Peptides were eluted from the column with 125  $\mu$ L of 50 mM TEAB (1 minute centrifugation at  
299 2000 $\times$ g, RT), 125  $\mu$ L of 5% formic acid [Fisher Chemicals, CAT# A118P-500] (1 minute centrifugation  
300 at 2000 $\times$ g, RT), and 125  $\mu$ L of 50% acetonitrile [Fisher Chemicals, CAT# A998-4] (5 minute  
301 centrifugation at 2000 $\times$ g, RT), resulting in a ~500  $\mu$ L solution of peptides in ~25 mM TEAB, ~1.25%  
302 formic acid, ~12.5% acetonitrile.

#### 303 Peptide desalting:

305 The peptide solution was frozen at -80°C and lyophilized using a Savant SPD111V SpeedVac  
306 Concentrator [Thermo Scientific, CAT# SPD111V-115], in line with -105°C Savant RVT5105  
307 Refrigerated Vapor Trap [Thermo Scientific, CAT# RVT5105-115], with vacuum supplied by a Fisher  
308 Scientific Maxima D4A Rotary Vane Pump [Thermo Scientific, CAT# 010574A]. The resulting solids  
309 were resuspended in 500  $\mu$ L of 0.1% trifluoroacetic acid (TFA) [Thermo Scientific, CAT# 28901] in  
310 HPLC-grade H<sub>2</sub>O via vortexing for 20 minutes in a Vortex Genie 2 vortex mixer. A Sep-Pak tC18 1 cc  
311 Vac Cartridge (50 mg sorbent) [Waters, CAT# WAT054960] was placed in a NucleoVac 24 Vacuum  
312 Manifold [MACHEREY-NAGEL, CAT# 740299] and washed with 1 mL of 100% acetonitrile and 2 mL  
313 of 0.1% TFA using laboratory vacuum. The peptide solution was centrifuged for 5 minutes at 16000 $\times$ g,  
314 RT, and the supernatant was applied onto the tC18 cartridge. Column-bound peptides were washed  
315 with 5 mL of 0.1% TFA and eluted with 750  $\mu$ L of 40% acetonitrile, 0.5% acetic acid and 750  $\mu$ L of 80%  
316 acetonitrile, 0.5% acetic acid into a 2 mL Protein LoBind Tube.

317  
318 Peptide quantification:

319 The resulting desalted peptide sample was frozen at -80°C, lyophilized (as described above), and the  
320 solids resuspended in 500 µL of 50% acetonitrile via vortexing in a Vortex Genie 2 vortex mixer for 20  
321 minutes. Notably, an undissolved precipitate was observed at this step, which is unusual for this  
322 protocol. The undissolved precipitate may indicate a high proportion of post-translationally modified  
323 peptides with poor solubility in 50% acetonitrile, i.e. glycosylated peptides, or other non-peptide  
324 molecules that were carried over in the protocol. The peptide solution was next centrifuged for 5 minutes  
325 at 16000×g, RT, and the supernatant containing only soluble peptides was transferred into a new 2 mL  
326 Protein LoBind Tube. The peptide concentration was determined with the BCA-like Biuret-reaction-  
327 based Pierce Quantitative Colorimetric Peptide Assay kit [Thermo Scientific, CAT# 23275].  
328

329 Sample preparation for mass-spectrometry analysis:

330 A 20 µg sample of peptides was frozen at -80°C and lyophilized (as described above), and resuspended  
331 in 20 µL of 5% acetonitrile, 5% formic acid, (final concentration 1 µg/µL) and vortexed at room  
332 temperature for 20 minutes in a vortex mixer. Samples were transferred to 300 µL Target Polyspring  
333 glass Inserts [Thermo Scientific, CAT# C4010-630] within 9 mm glass autosampler vials with pierceable  
334 PTFE septa [Thermo Scientific, CAT# C5000-580W].  
335

336 **Proteomic liquid chromatography, mass spectrometry:**

337 1 µL of sample (1 µg of peptides) was injected onto an Easy-Spray PepMap Neo 2 µm C18 75 µm X  
338 150 mm column [Thermo Fisher, CAT# ES75150PN] using an Thermo Easy-nLC 1000 liquid  
339 chromatography instrument (HPLC) [Thermo Fisher, CAT# LC120]. Peptides were separated via  
340 reverse-phase chromatography at a flow rate of 0.4 µL/minute. Solvent A of the mobile phase consisted  
341 of 0.1% formic acid in HPLC-grade water, while solvent B consisted of 0.1% formic acid in acetonitrile.  
342 An initial 2-min isocratic gradient flow of 3% B was followed by a linear increase up to 25% B for 85  
343 min, increased to 45% B over 15 min, and a final increase to 95% B over 15 min, whereupon B was  
344 held for 6 min and returned to baseline (2 min) and held for 10 min, for a total of 183 min. Sample  
345 spectra were collected on an Orbitrap Fusion tribrid mass spectrometer (Thermo Scientific,  
346 Wikidata:[Q120754733](https://www.wikidata.org/wiki/Q120754733)) that collected MS<sup>1</sup> data in positive ion mode within the 375 to 1,500 m/z range,  
347 Orbitrap resolution: 120000, data type: centroid, precursor ion isolation window (m/z): 0.7, and HCD  
348 collision energy set at 30%. Data dependent MS<sup>2</sup> fragmentation spectra were recorded in the linear ion  
349 trap. A vendor-software exported report on the used MS<sup>1</sup> and MS<sup>2</sup> methods is available on Zenodo  
350 (doi:[10.5281/zenodo.10023360](https://doi.org/10.5281/zenodo.10023360)). 3 separate injections & MS runs, i.e. “technical replicates” were  
351 performed off the same resuspended peptide sample.  
352

353 **Proteomic peptide & protein identification:**

354 Peak lists obtained from MS/MS spectra were identified using X!Tandem version X! Tandem  
355 Vengeance (2015.12.15.2) (67) and Comet version 2023.01 rev. 2 (68). The search was conducted  
356 using SearchGUI version 4.2.17 (69).

357 Protein identification was conducted against a concatenated target/decoy (70) version of the  
358 *Prymnesium parvum* 12B1 polypeptides (predicted from gene models) including 24938 (target) or  
359 49876 (target+decoy) sequences. The filename of the used database was:  
360 simple\_nostops\_12B1v1.1.fasta\_concatenated\_target\_decoy.fasta , the seqkit (v2.5.0) (71)  
361 checksum was: seqkit.v0.1\_PLS\_k0\_1221bf0c34f4b151e5f4d2c96f391bcd , the MD5 checksum was:  
362 688eaf7347ce157ff94322be6c3d29ff . C-terminal stop codons were removed from the predicted  
363 polypeptides before decoy creation. The decoy sequences were created by reversing the target  
364 sequences in SearchGUI.

365 The identification settings were as follows: Trypsin, Specific, with a maximum of 2 missed  
366 cleavages 15.0 ppm as MS<sup>1</sup> and 0.2 Da (Th) as MS<sup>2</sup> tolerances; fixed modifications:



367 Carbamidomethylation of C (+57.021464 Da), variable modifications: Oxidation of M (+15.994915  
368 Da), fixed modifications during refinement procedure: Carbamidomethylation of C (+57.021464 Da),  
369 variable modifications during refinement procedure: Acetylation of protein N-term (+42.010565 Da),  
370 Pyrolysine from E (-18.010565 Da), Pyrolysine from Q (-17.026549 Da), Pyrolysine from  
371 carbamidomethylated C (-17.026549 Da). All algorithm specific settings are listed in the Protein  
372 Identification Certificate of Analysis available as 'certificate\_of\_analysis.txt' on Zenodo  
373 (doi:[10.5281/zenodo.10023441](https://doi.org/10.5281/zenodo.10023441)).

374 Peptides and proteins were inferred from the spectrum identification results using  
375 PeptideShaker version 2.2.25 (72). Peptide Spectrum Matches (PSMs), peptides and proteins were  
376 validated at a 1.0% False Discovery Rate (FDR) estimated using the decoy hit distribution. All  
377 validation thresholds are listed in the Certificate of Analysis available as 'certificate\_of\_analysis.txt' on  
378 Zenodo (doi:[10.5281/zenodo.10023441](https://doi.org/10.5281/zenodo.10023441)). Spectrum counting abundance indexes were estimated  
379 using the Normalized Spectrum Abundance Factor (73) adapted for better handling of protein  
380 inference issues and peptide detectability.

381 Source data files (.raw, .mzML files) are available via ProteomeXchange with identifier  
382 PXD044632 (doi:[10.6019/PXD044632](https://doi.org/10.6019/PXD044632)), while resulting files from the downstream SearchGUI &  
383 PeptideShaker proteomic analysis are available on Zenodo (doi:[10.5281/zenodo.10023441](https://doi.org/10.5281/zenodo.10023441)).

### 385 **Analysis of proteomic results:**

386 The 'Default Peptide Report.txt' TSV from the SearchGUI & PeptideShaker analysis was filtered down  
387 to those peptides that confidently matched (as scored by SearchGUI & PeptideShaker) against the  
388 PKZILLAs using a custom Jupyter notebook. The vast majority (68/70) of confident peptides that  
389 matched against the PKZILLAs, cross-matched only to the PKZILLAs, and the remaining 2/70 that  
390 also matched non-PKZILLA proteins, were removed from downstream analyses, as their removal  
391 minorly decreased the confidence of presented interpretations but also simplified explanations of this  
392 analysis. The Jupyter notebook next classified confident peptides as protein-unique (only matched a  
393 single PKZILLA protein), or those that were protein-multimatch (matched  $\geq 2$  PKZILLA proteins),  
394 and further sub-classified those categories down to those peptides that matched/were translated from  
395 a single PKZILLA CDS/exon region (exon-unique), or those that arose from multiple PKZILLA  
396 CDS/exon regions (exon-multimatch). This Jupyter notebook and spreadsheets of the resulting  
397 peptide categorizations are available on Zenodo (doi:[10.5281/zenodo.10028959](https://doi.org/10.5281/zenodo.10028959)). See also fig. S8,  
398 S9.

### 400 **IntroProScan annotation of PKZILLA domains:**

401 The 3 PKZILLA polypeptides were extracted from all gene model polypeptides of the 12B1 gene  
402 annotation, and annotated with InterProScan v5.64-96.0 (25) using Singularity/Apptainer v3.5.8 (74,  
403 75) execution of the InterProScan Docker image, via a custom Nextflow wrapper workflow (76). In brief,  
404 all available InterProScan searches were performed, and post-processing of the GFF annotations was  
405 applied to remove certain PKS domain annotations for the KR and ER domains (Table S3) that gave  
406 erroneous duplicate annotations from shared homology. The workflow and InterProScan results for the  
407 PKZILLA polypeptides are available on Zenodo (doi:[10.5281/zenodo.10023460](https://doi.org/10.5281/zenodo.10023460)). Specific InterProScan  
408 annotations that were deemed to be diagnostic for and representative of particular PKS domains are  
409 described in the "run2\_filter.tsv" file of the aforementioned Zenodo dataset, and renaming from the  
410 InterPro entry identifiers to human readable identifiers are defined in "renaming.tsv" and  
411 "renaming2.tsv". Full graphical plots of all domains on the PKZILLAs are available in the  
412 "./results/pdf\_2\_PDF\_A\_1B/output/\*.pdf" files, whereas graphical plots of a length normalized  
413 representation of the diagnostic PKS domains are available in the  
414 "./results/beads\_on\_string:pdf\_2\_PDF\_A\_1B/output/\*.pdf" files. See also (maintext Fig. 2). Non length  
415 normalized representations are shown in fig. S6, S7, and the source analysis is available on Zenodo  
416 (doi:[10.5281/zenodo.10093617](https://doi.org/10.5281/zenodo.10093617)). Graphical plots were generated with DNA Features Viewer (77). Non-



PKZILLA polypeptides were independently annotated with the same process but with a separate execution and a simplified workflow entry-point of 'do\_simple\_nonparallel\_scan' that did not include graphical plotting. The workflow and InterProScan results for the non-PKZILLA polypeptides are available on Zenodo (doi:[10.5281/zenodo.10011739](https://doi.org/10.5281/zenodo.10011739)).

### Analysis of active site residues within PKZILLA PKS domains:

The presence or absence of expected conserved active site residues (catalytic or prosthetic group attachment sites) within domains of the PKZILLAs, were determined for the polyketide ketosynthase (KS), acyl carrier protein (ACP), dehydratase (DH), and ketoreductase (KR), flavin oxygenase (FLX), and enoyl (ER) domains, using either multiple sequence alignment liftover of the active site location & interpretation using the single- or multi-residue motif as defined by InterProScan annotations, or, locations & motifs as defined from literature sources, namely Fig. S4 of (17), Fig. S35 of (78), and Fig. S5 of (79). Notably active site residues for the ER and FLX domains were not available via InterProScan or literature sources. Essential and universally conserved active site residues for the ERs have not been reported despite determined efforts as of 2015 (80). For the FLX domains, which via AlphaFold2 (81, 82) structural predictions and FoldSeek (83) structural similarity searches (doi:[10.5281/zenodo.10120640](https://doi.org/10.5281/zenodo.10120640)) have significant yet divergent structural homology with flavin-containing monooxygenase (FMO) proteins, catalytic active site residues have been claimed for certain structural homologs (84), but are not conserved across the full set of active FMO structural homologs (85), and thus the FLXs were not included in the PKZILLA active site analysis.

Annotated PKS domains were sourced from the 'gt\_extractfeat' process results of the PKZILLA InterProScan available on Zenodo (doi:[10.5281/zenodo.10023460](https://doi.org/10.5281/zenodo.10023460)), and renamed according to their increasing order N-terminal to C-terminal on the PKZILLA polypeptides, i.e. KS1, KS2, KS3, etc. A custom bash script using seqkit (71), bedtools (52), and kalign2 (58), was used to create multiple sequence alignments of, and extract the residues at matching active sites, from the PKZILLA PKS domains. All ACP, and DH domains for PKZILLA-1 and -2 had the expected active site residues, while the ER and FLX domains were not included due to a lack of active site information. KS domains were scored as KS<sup>0</sup> aka "non-elongating"/"condensation-incompetent"/"transacylase" KSs based on the deviation of the histidine in the HGTGT active site motif (29, 86, 87). In contrast, KR domains had two unusual aspects: **(1)** They came in two classes - contiguous or split. The KR domain is made up of two homologous N-terminal structural and C-terminal catalytic subdomains. Typically, these two subdomains are contiguous or nearly so. However certain fatty acid synthase (FAS) or PKS proteins show a split configuration, where the two KR subdomains are intervened and split by another PKS domain. This configuration can be seen with the InterPro domain annotations for the Porcine (*Sus scrofa*) FAS protein (<https://www.ebi.ac.uk/interpro/protein/UniProt/I3LCW1/>), where the ER domain intervenes between the two KR subdomains. In the literature, the subdomains showing this phenomena have been dubbed as the N-terminal KR<sup>s</sup> or KR<sub>s</sub> (structural) or C-terminal KR<sup>c</sup> or KR<sub>c</sub> (catalytic) subdomains (88–90). We use the nomenclature KR or KR<sub>f</sub> (full-length), KR<sub>n</sub> (N-terminal), and KR<sub>c</sub> (C-terminal) to distinguish our 3 subclasses of ketoreductase (sub)domains. Notably, some unannotated gaps in the PKZILLA are similar to the KR<sub>n</sub> subdomains and show a nearby annotated KR<sub>c</sub> subdomain, suggesting that KR<sub>n</sub> domains may have diverged away from bioinformatic detection (table S6, S7). **(2)** The catalytic residues of several KR<sub>f</sub> and KR<sub>c</sub> domains do not match with expectations for activity, and thus we interpret their source domains as catalytically inactive. Some KR domains showed expected catalytic residues for activity, yet we anticipated they would be inactive based on our biosynthetic model - thus a 2nd tier of analysis was applied where KR domains predicted to phylogenetically cluster with and descend from the last common ancestor for PKZILLA-1\_\_KR31c0 (inactivity assigned based on active site residues) and PKZILLA-1\_\_KR14c (fig. S12, Table S6, S7, S8, S9) were assigned as inactive. This clade was selected based on their relatively long phylogenetic branches (suggesting relaxation of selection from inactivity), and the matching with expectation of inactivity from the biosynthetic model. An alternative hypothesis is they are catalytically active domains but catalyze non-

467 standard reactions. Throughout the manuscript and figures we dub these putatively inactive or diverged  
468 domains as KR<sup>0</sup>/KRf<sup>0</sup>/KRf0, KRn<sup>0</sup>/KRn0, or KRc<sup>0</sup>/KRc0. The workflow and results for this analysis,  
469 including Excel spreadsheets of the sequences at active site residues, is available on Zenodo  
470 (doi:[10.5281/zenodo.10028517](https://doi.org/10.5281/zenodo.10028517)).

**A**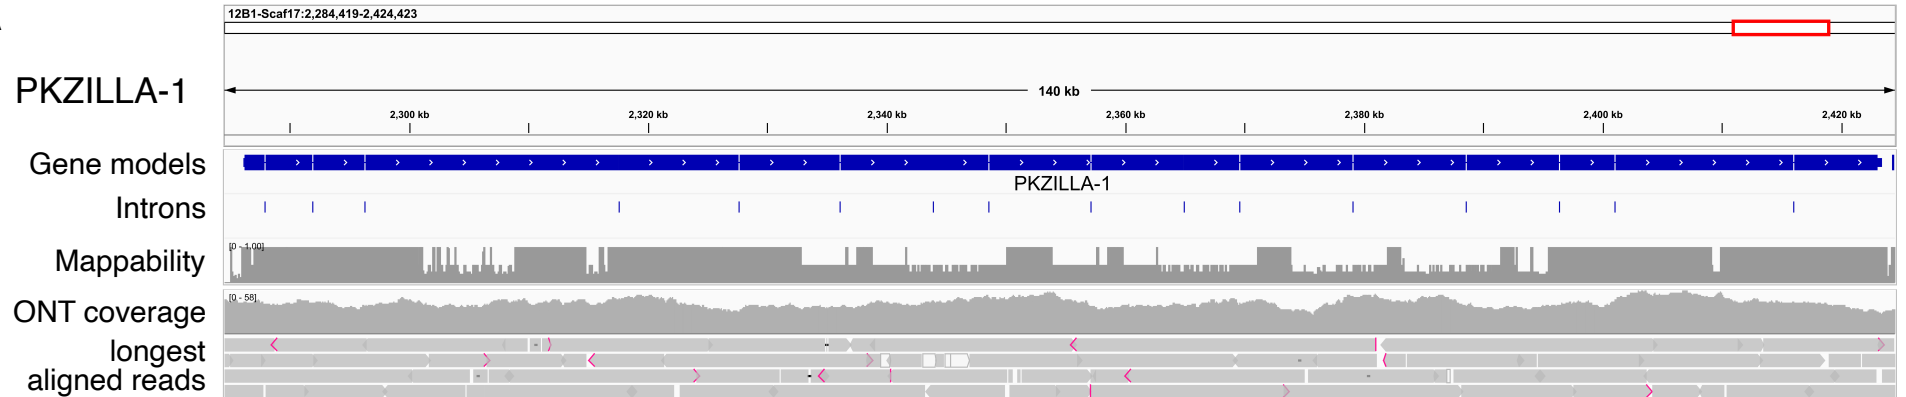**B**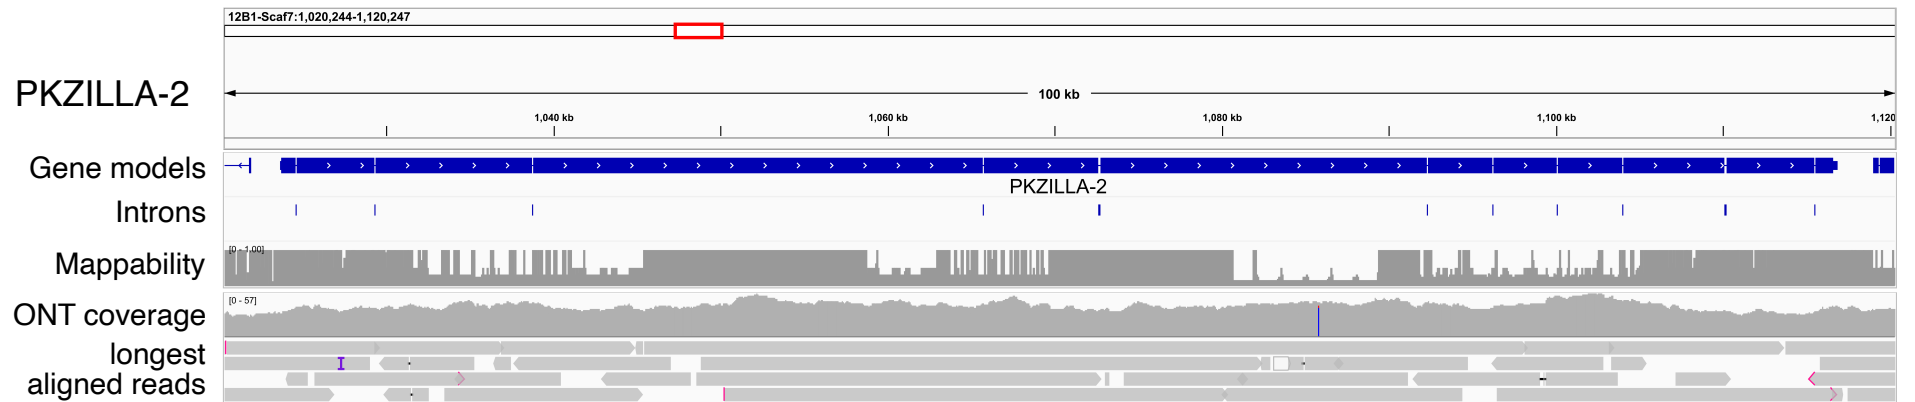**C**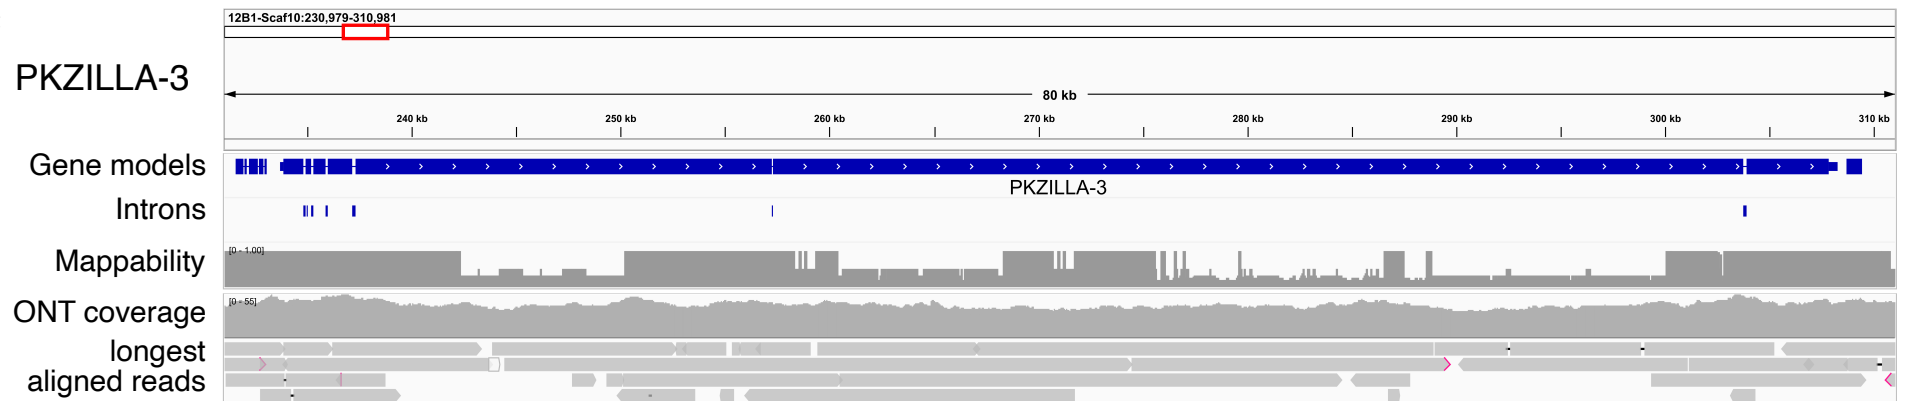

**Fig. S1:** Expanded genomic detail for PKZILLA gene models. PKZILLA-1,-2,-3 are shown as panel A,B,C. Aligned Oxford Nanopore (ONT) reads (20) show no evidence of assembly errors like sharp coverage discontinuities, frequent coincident insertions or deletions, or frequent coincident single nucleotide variations (SNVs), excluding the synonymous SNV T→C (L20550L) in PKZILLA-2. Graphical key: Pink arrows=read soft-clips. Vertical purple bar=read insertions. Black horizontal line=read deletions. IGV parameters: Allele Frequency Threshold=0.70, Hide Small Indels=Yes, Sort Alignments by=aligned read length. Show mismatched bases=Off. Mappability was calculated with genmap v1.3.0 (91), with parameters K=100 and E=2. Drops from maximum of the mappability track represent low short read mappability due to repetitive sequences. Figure produced with Integrated Genomics Viewer (IGV) v2.16.2 (51).

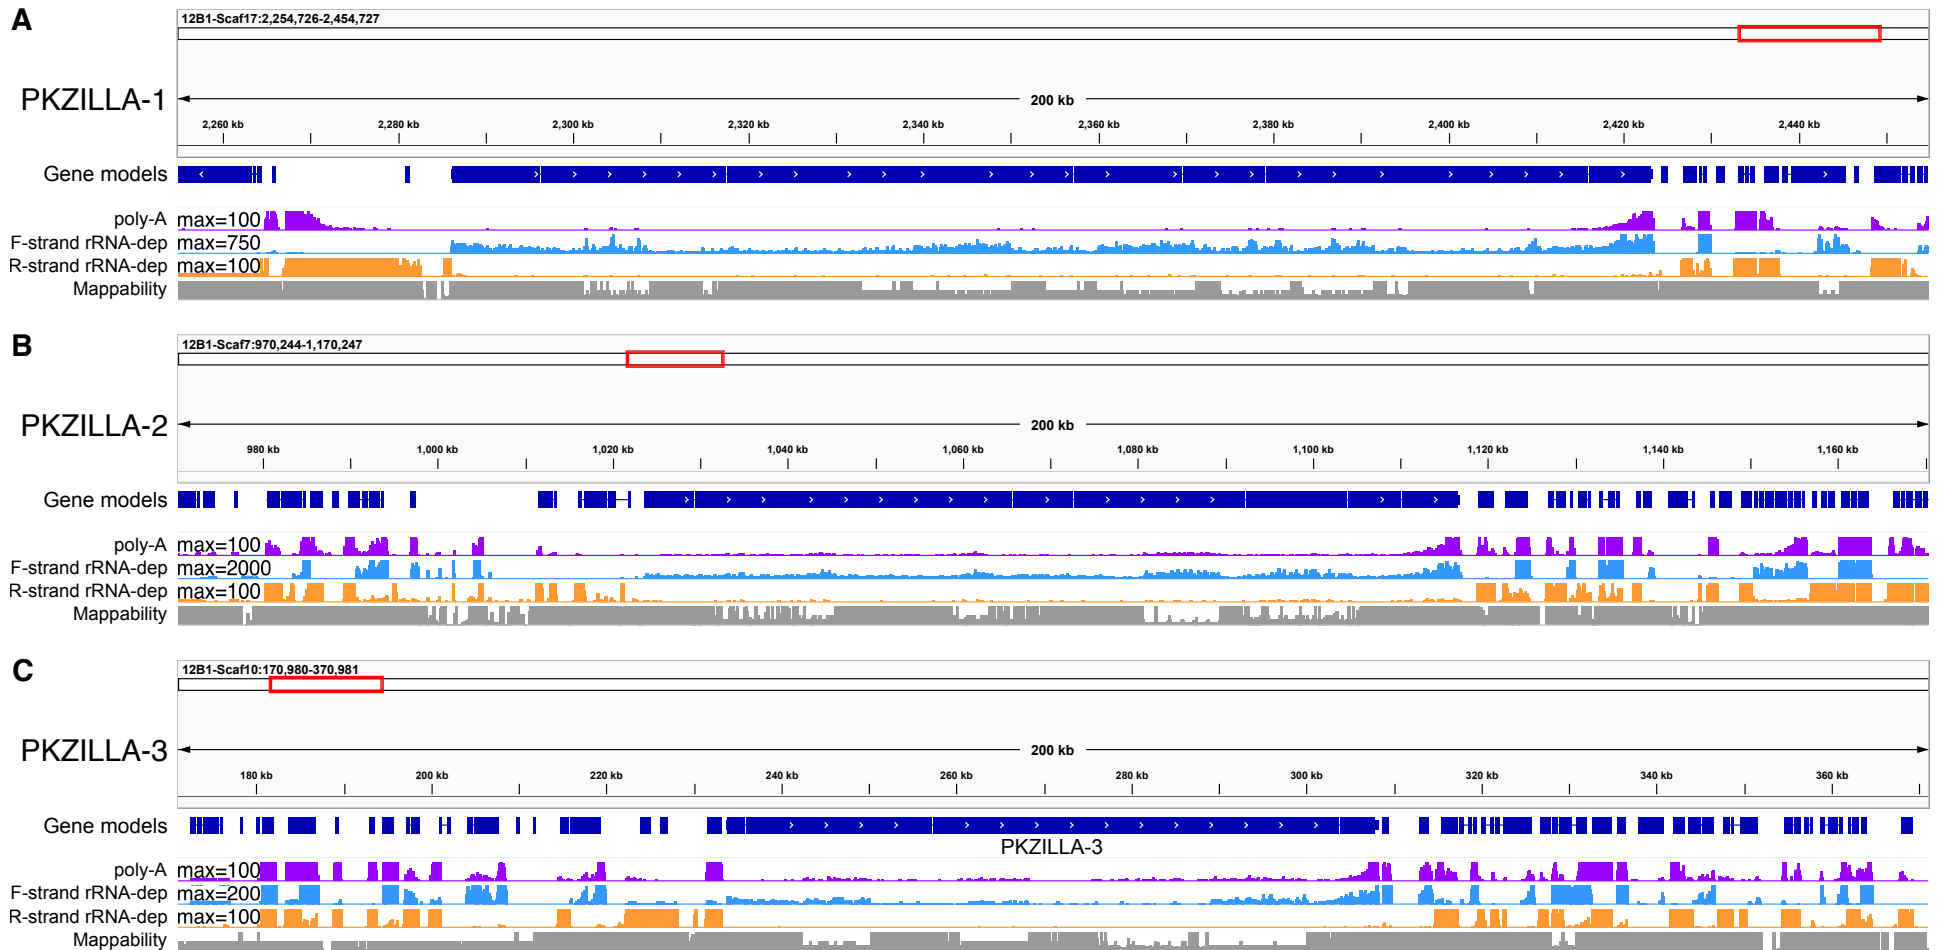

**Fig. S2:** Expanded transcriptomic detail for PKZILLA gene models. PKZILLA-1,-2,-3 are shown as panel A,B,C. poly-A=Coverage of hisat2 aligned poly-A pulldown RNA-Seq reads. F-strand rRNA-dep=Coverage of extracted forward-stranded reads for hisat2 aligned rRNA depletion RNA-Seq reads. R-strand rRNA-dep=Coverage of extracted reverse-stranded reads for hisat2 aligned rRNA depletion RNA-Seq reads. RNA-Seq coverage tracks have a linear scale, scaled to the maximum values annotated on the tracks. Note that the poly-A and R-strand tracks are scaled to a lower maximum to enhance sensitivity. Note that the antisense strand has negligible coverage, supporting one transcriptional start site (TSS) per hotspot. Mappability was calculated with genmap v1.3.0 (91), with parameters K=100 and E=2. Drops from maximum of the mappability track represent low short read mappability due to repetitive sequences. Figure produced with Integrated Genomics Viewer (IGV) v2.16.2 (51).



## A - PKZILLA-1 Intron #1

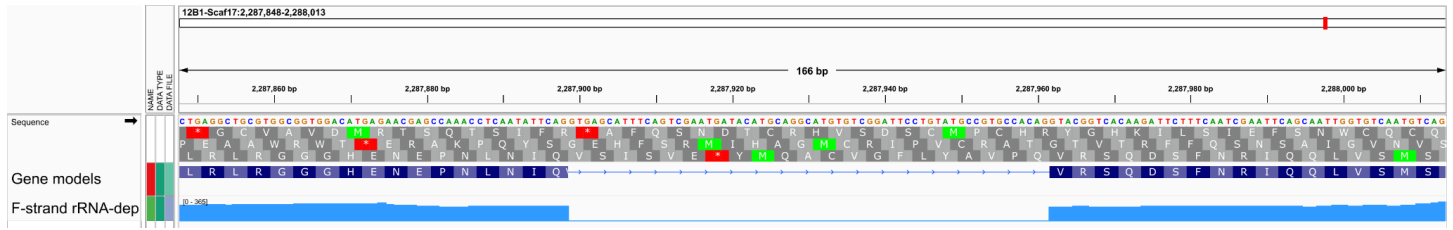

## B - PKZILLA-1 Intron #2

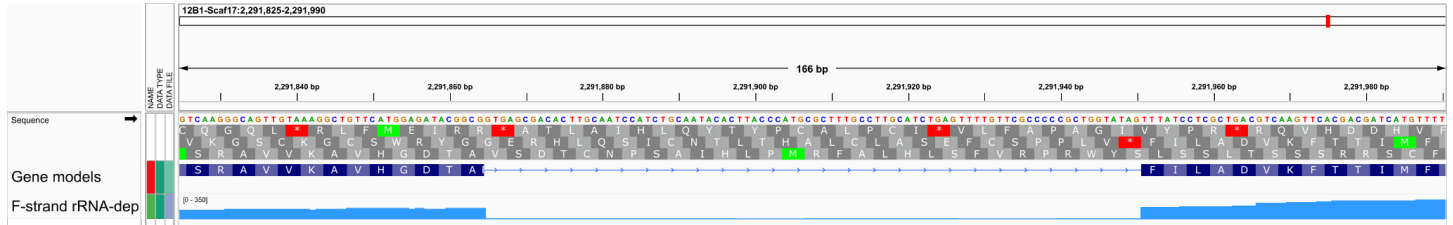

## C - PKZILLA-1 Intron #3

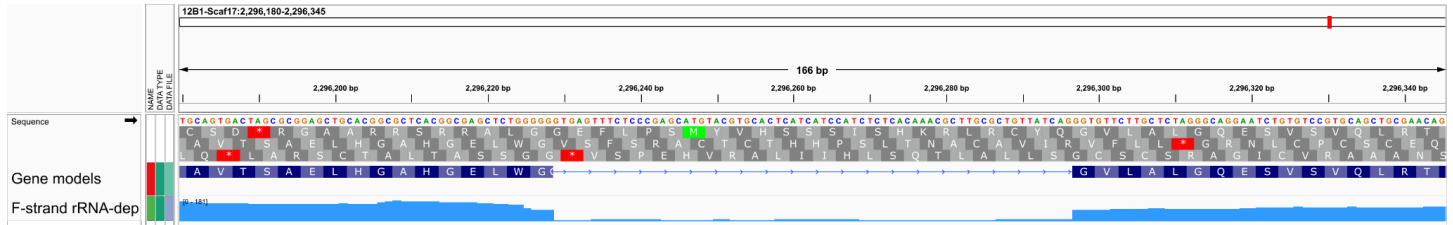

## D - PKZILLA-1 Intron #4

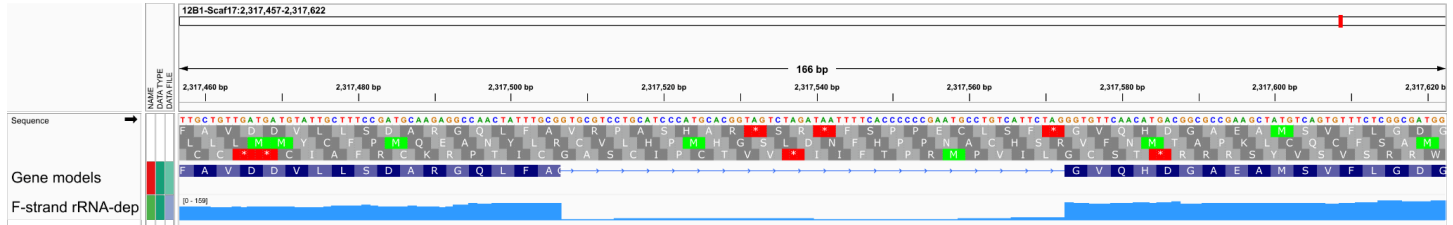

## E - PKZILLA-1 Intron #5

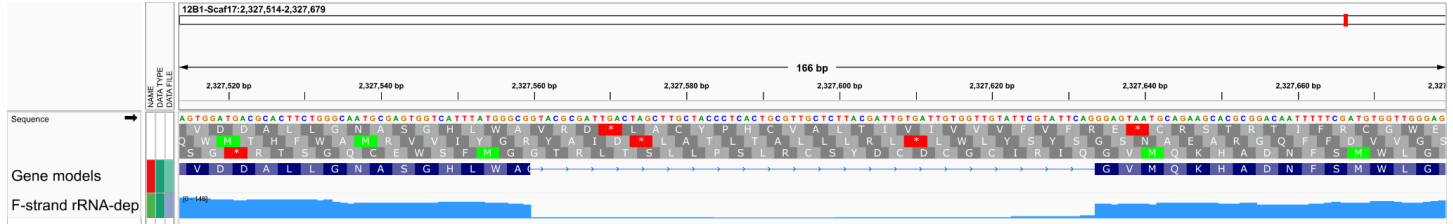

## F - PKZILLA-1 Intron #6

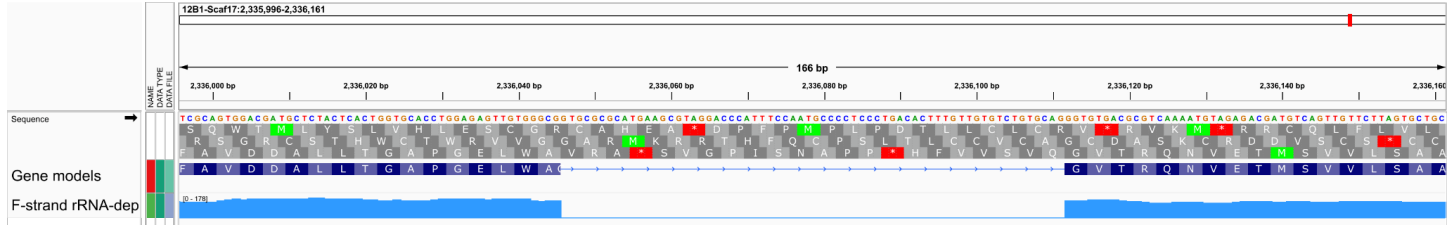

## G - PKZILLA-1 Intron #7

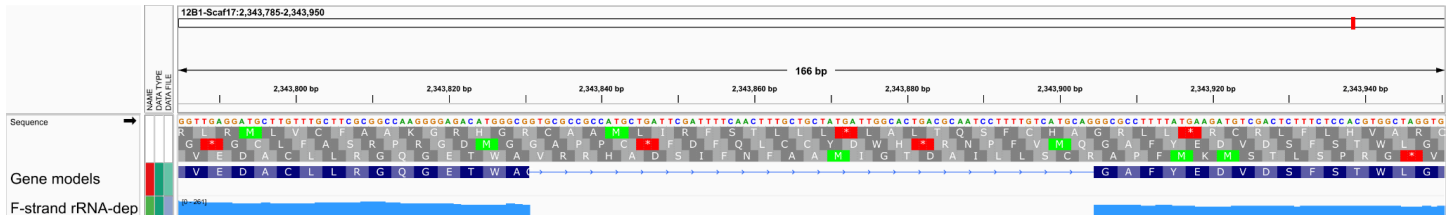

## H - PKZILLA-1 Intron #8

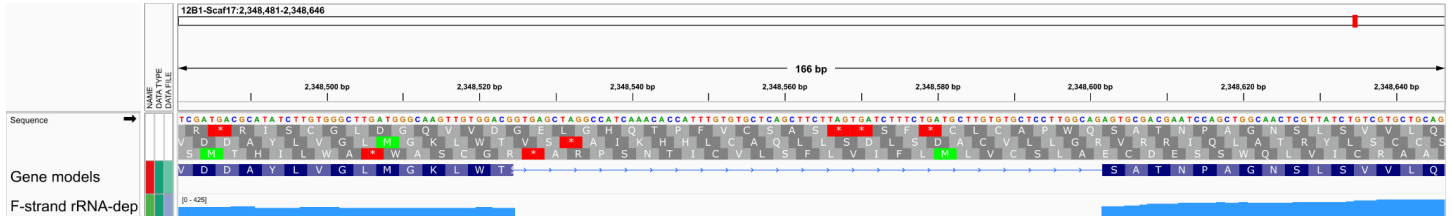

## I - PKZILLA-1 Intron #9

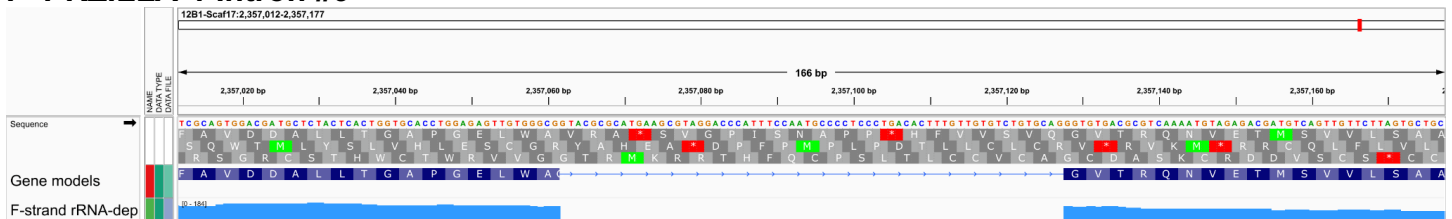

## J - PKZILLA-1 Intron #10

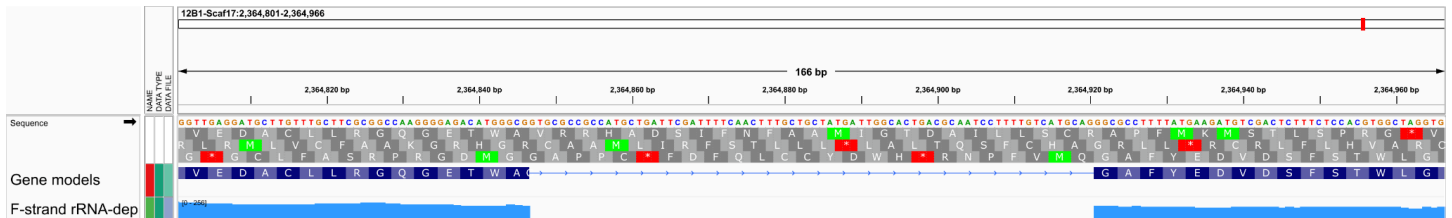

## K - PKZILLA-1 Intron #11

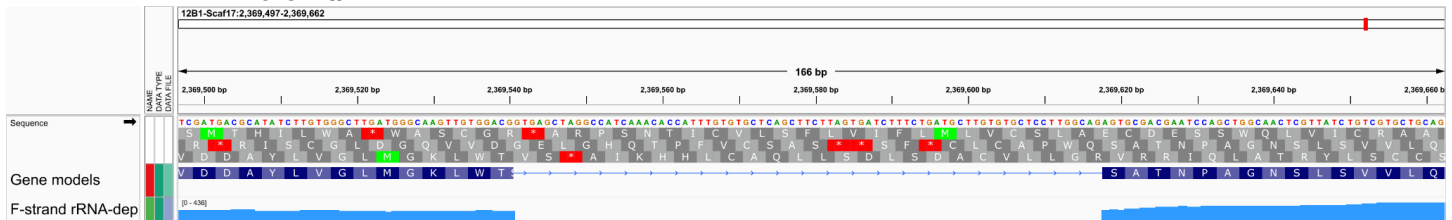

## L - PKZILLA-1 Intron #12

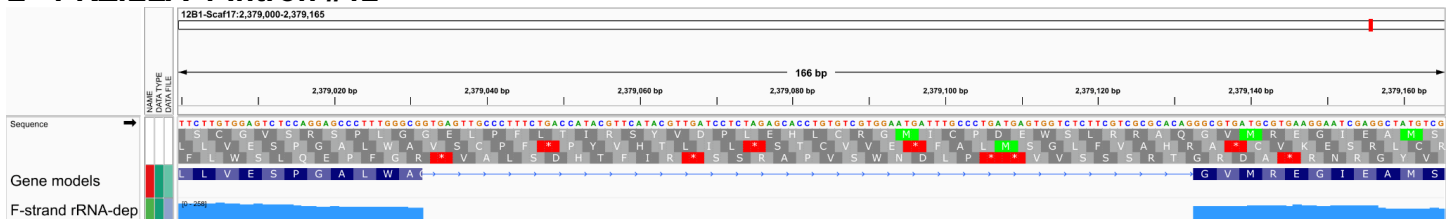

## M - PKZILLA-1 Intron #13

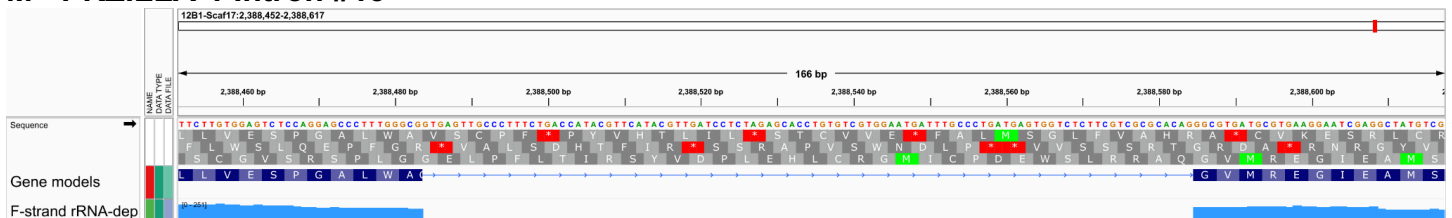

### N - PKZILLA-1 Intron #14

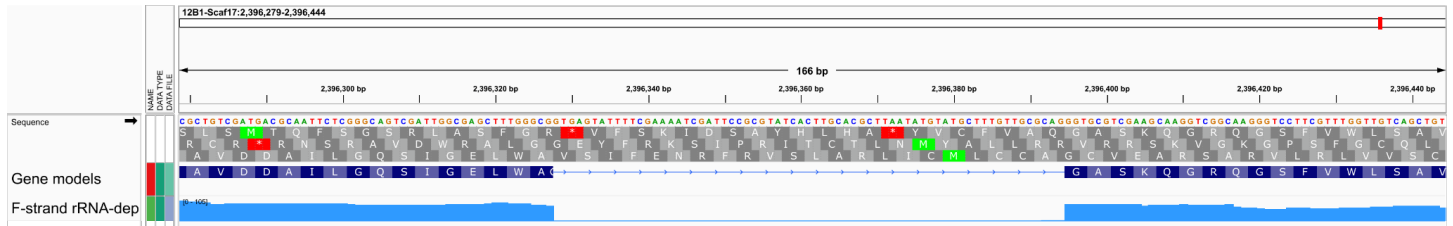

### O - PKZILLA-1 Intron #15

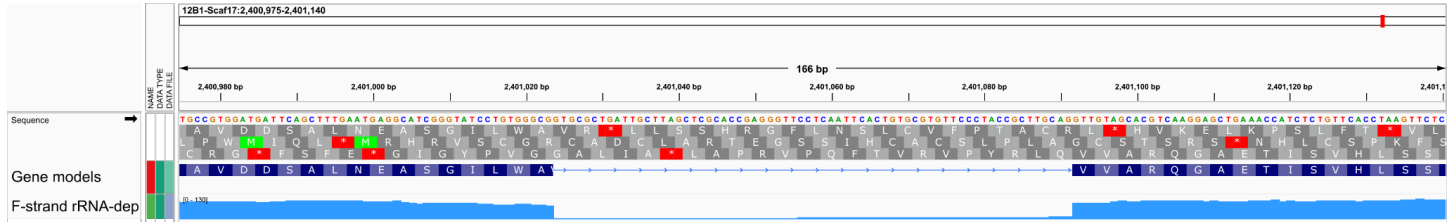

### P - PKZILLA-1 Intron #16

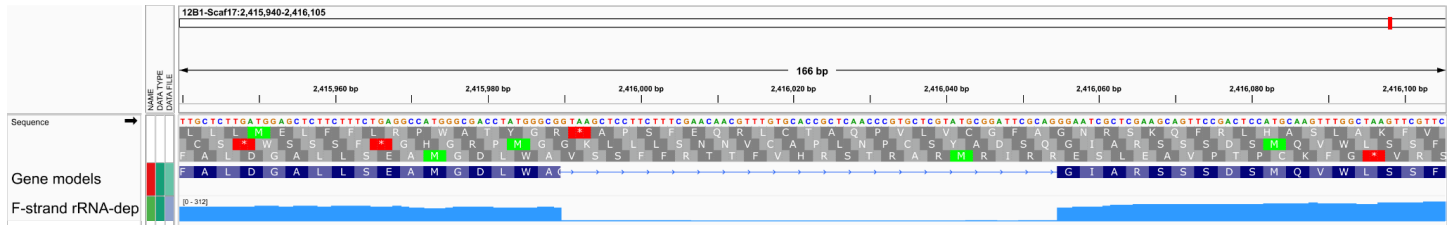

**Fig. S3:** Detail view of PKZILLA-1 introns. Note the drop in aligned rRNA depletion RNA-Seq coverage, and presence of canonical GT-AG splice donor and acceptor sites. Figure produced with Integrated Genomics Viewer (IGV) v2.16.2 (51).

### A - PKZILLA-2 Intron #1

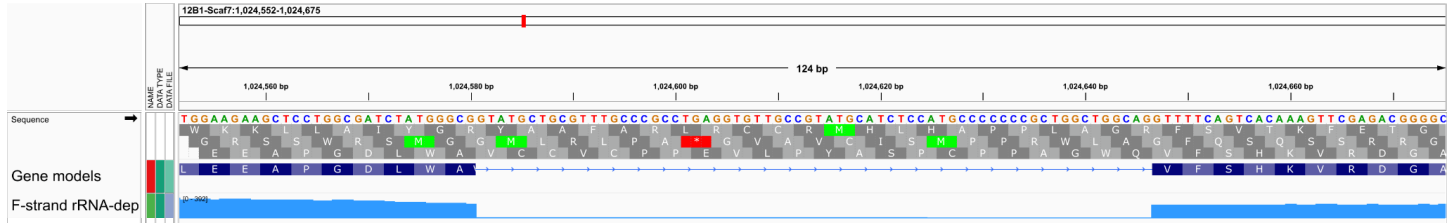

### B - PKZILLA-2 Intron #2

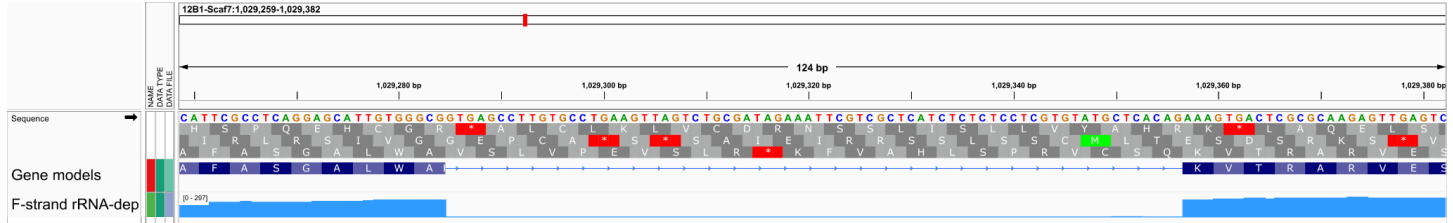

### C - PKZILLA-2 Intron #3

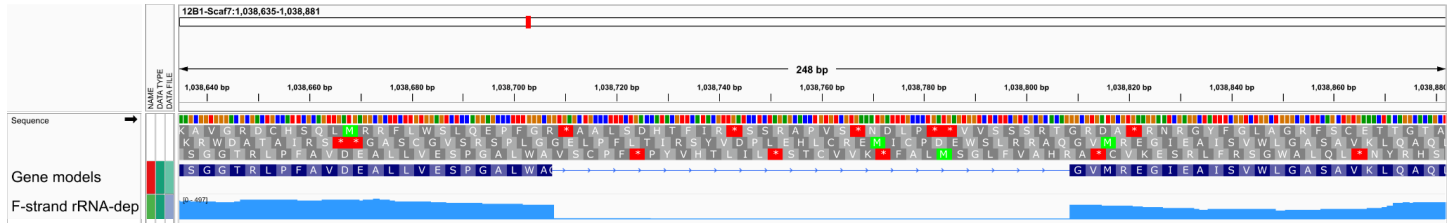

### D - PKZILLA-2 Intron #4

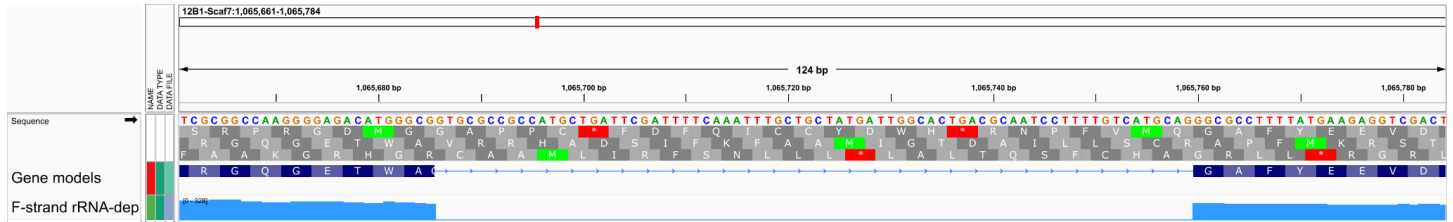

### E - PKZILLA-2 Intron #5

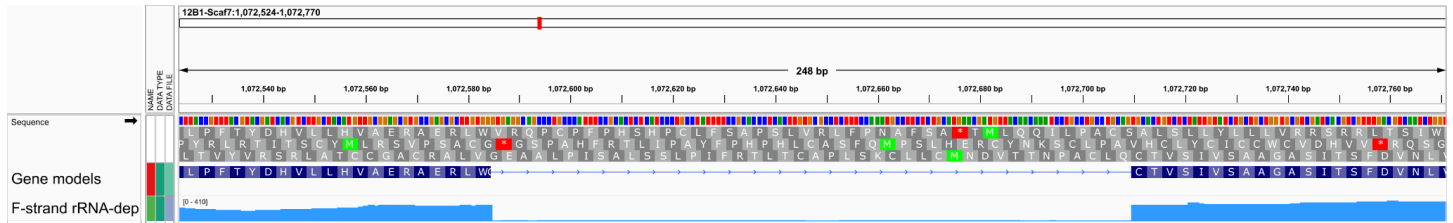

### F - PKZILLA-2 Intron #6

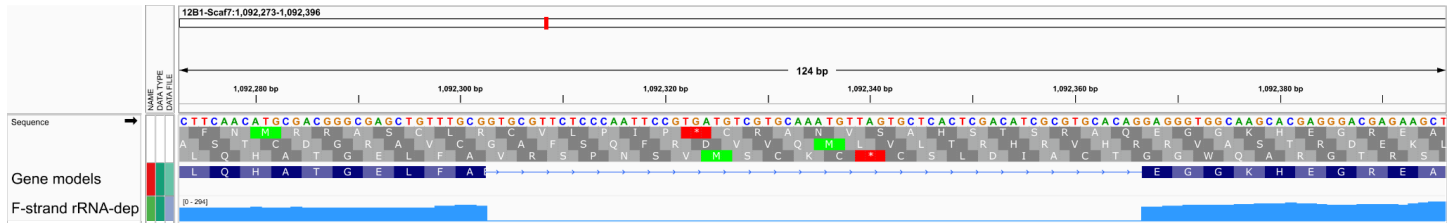

## G - PKZILLA-2 Intron #7

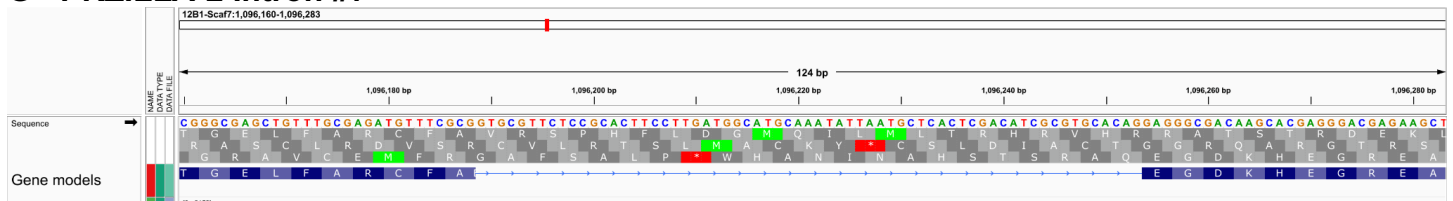

## H - PKZILLA-2 Intron #8

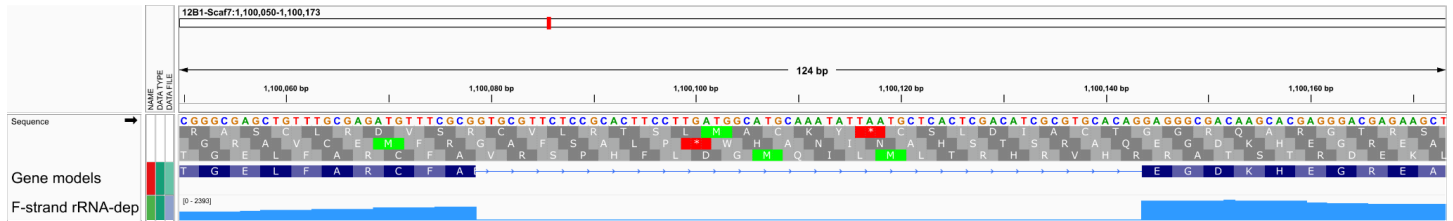

## I - PKZILLA-2 Intron #9

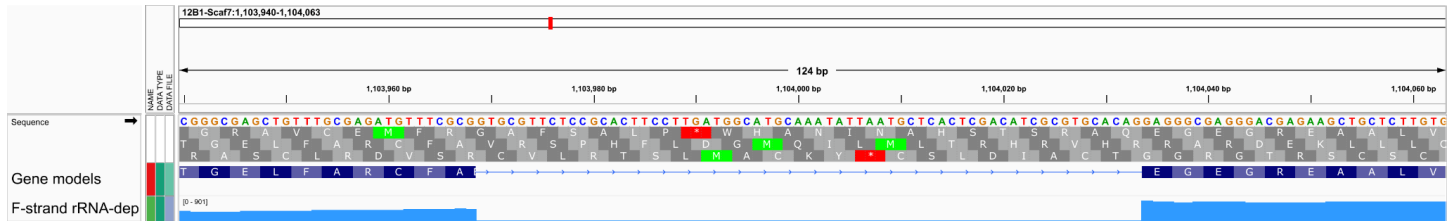

## J - PKZILLA-2 Intron #10

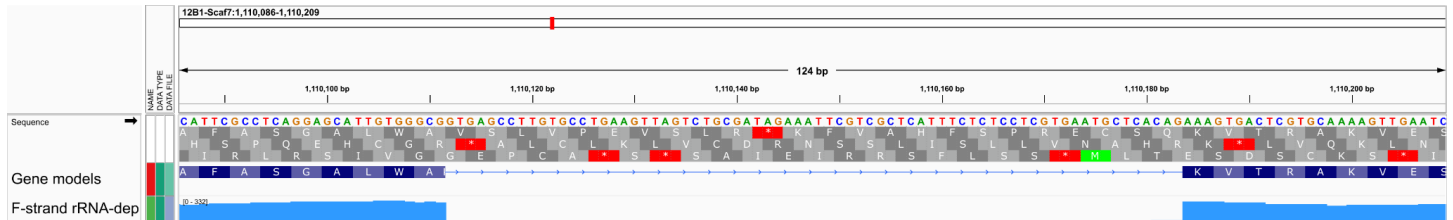

## K - PKZILLA-2 Intron #11

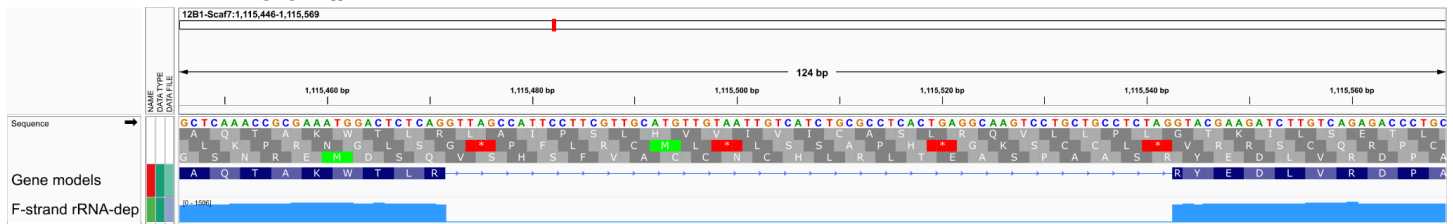

**Fig. S4:** Detail view of PKZILLA-2 introns. Note the drop in aligned rRNA depletion RNA-Seq coverage, and presence of canonical GT-AG splice donor and acceptor sites. Figure produced with Integrated Genomics Viewer (IGV) v2.16.2 (51).



## A - PKZILLA-3 Intron #1

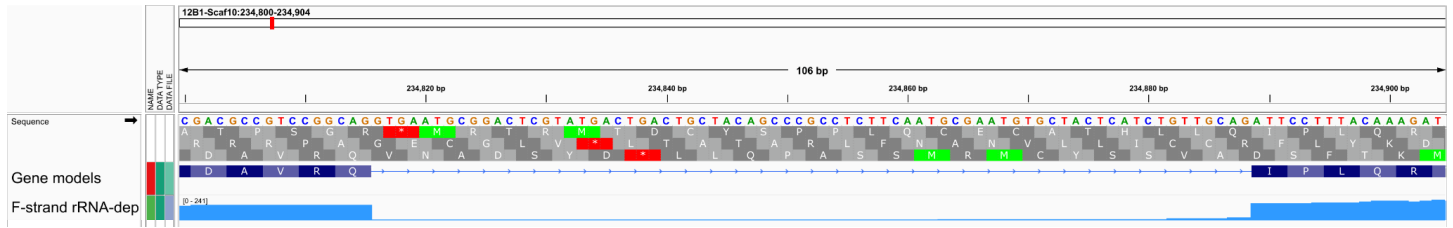

## B - PKZILLA-3 Intron #2

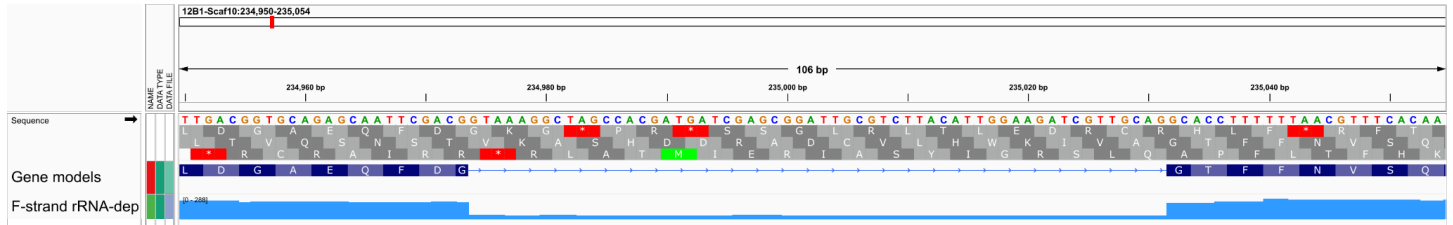

## C - PKZILLA-3 Intron #3

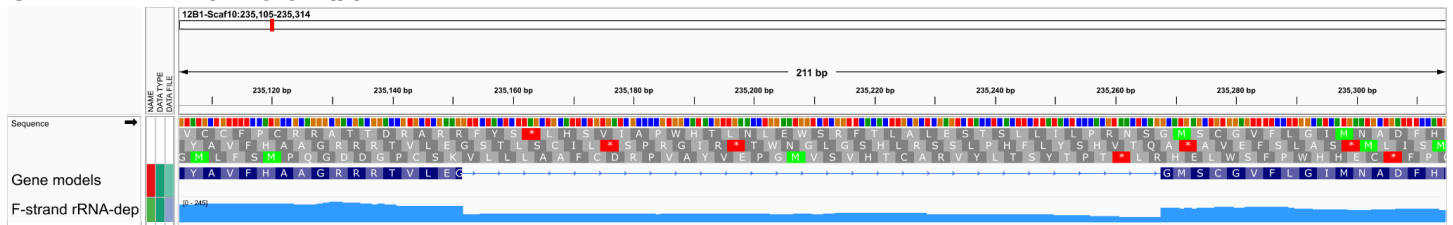

## D - PKZILLA-3 Intron #4

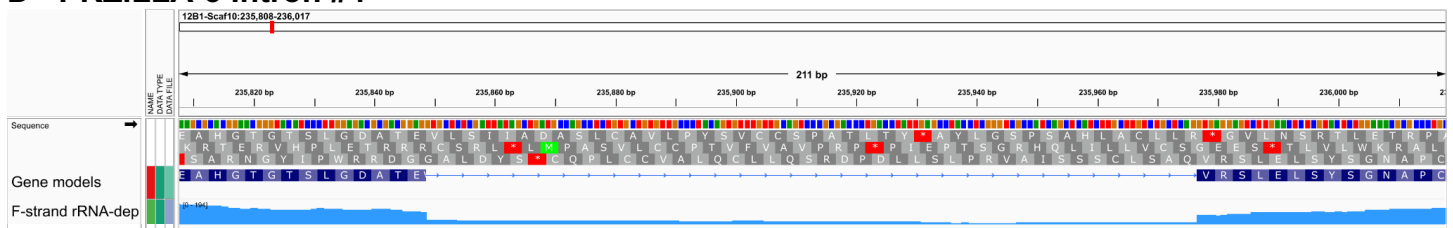

## E - PKZILLA-3 Intron #5

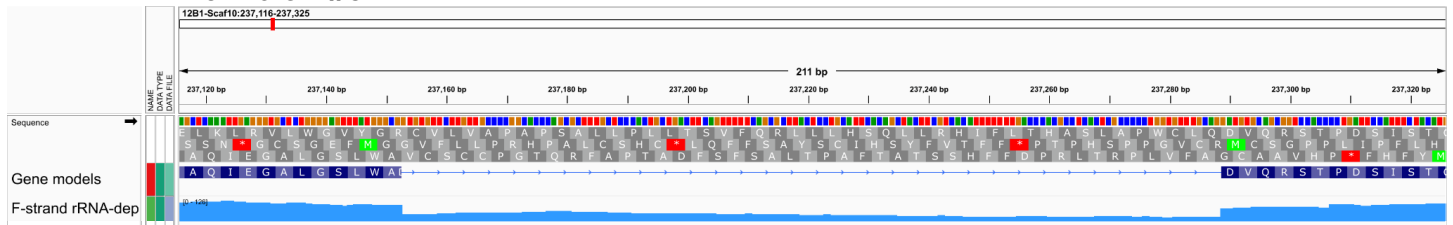

## F - PKZILLA-3 Intron #6

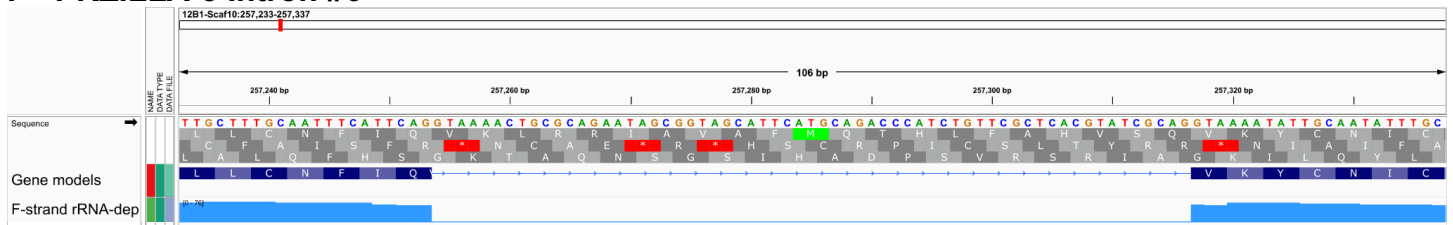

## G - PKZILLA-3 Intron #7

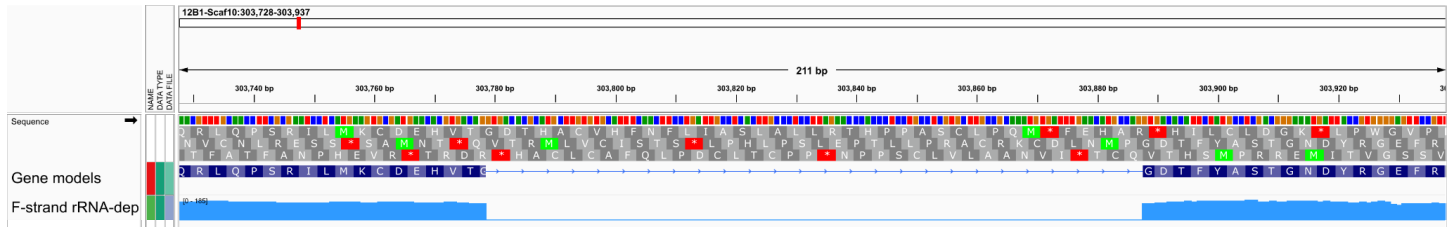

**Fig. S5:** Detail view of PKZILLA-3 introns. Note the drop in aligned rRNA depletion RNA-Seq coverage, and presence of canonical GT-AG splice donor and acceptor sites. Figure produced with Integrated Genomics Viewer (IGV) v2.16.2 (51).

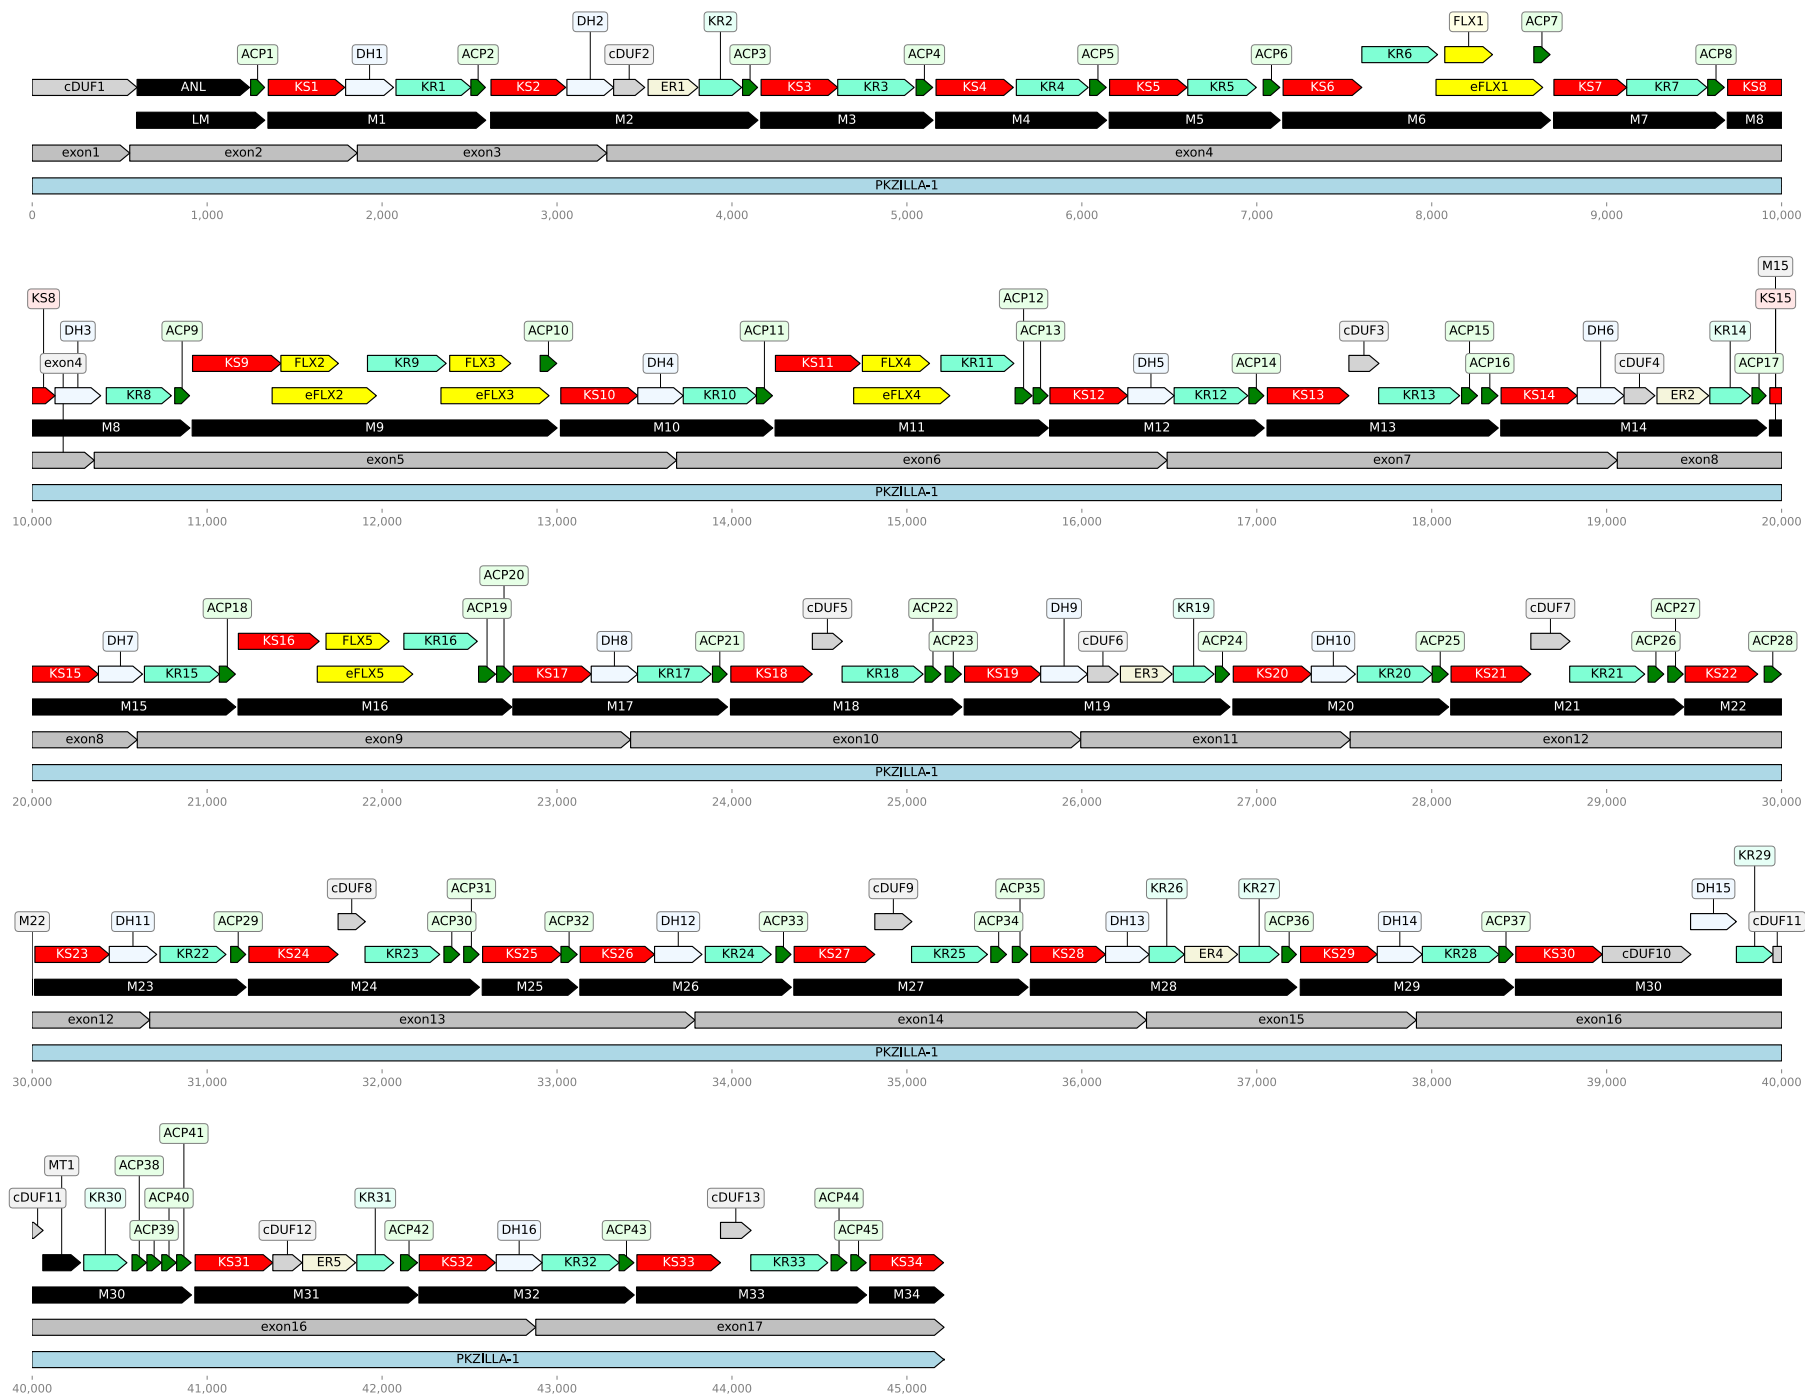

**Fig. S6:** Graphical plot of non-length-normalized PKZILLA-1 polypeptide (light blue), PKS modules (black), domains (varied colors), and unannotated cDUFs (light gray), and the relationship of shown regions with their source exons (dark gray). Plot generated with DNA Features Viewer (77). Source files, scripts, and resulting plots available on Zenodo (doi:[10.5281/zenodo.10093617](https://doi.org/10.5281/zenodo.10093617)).

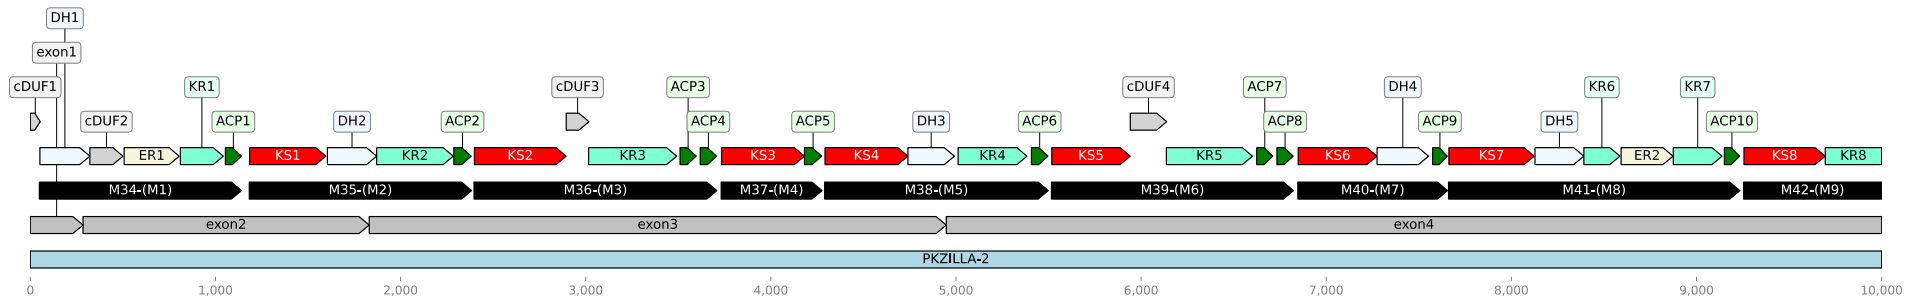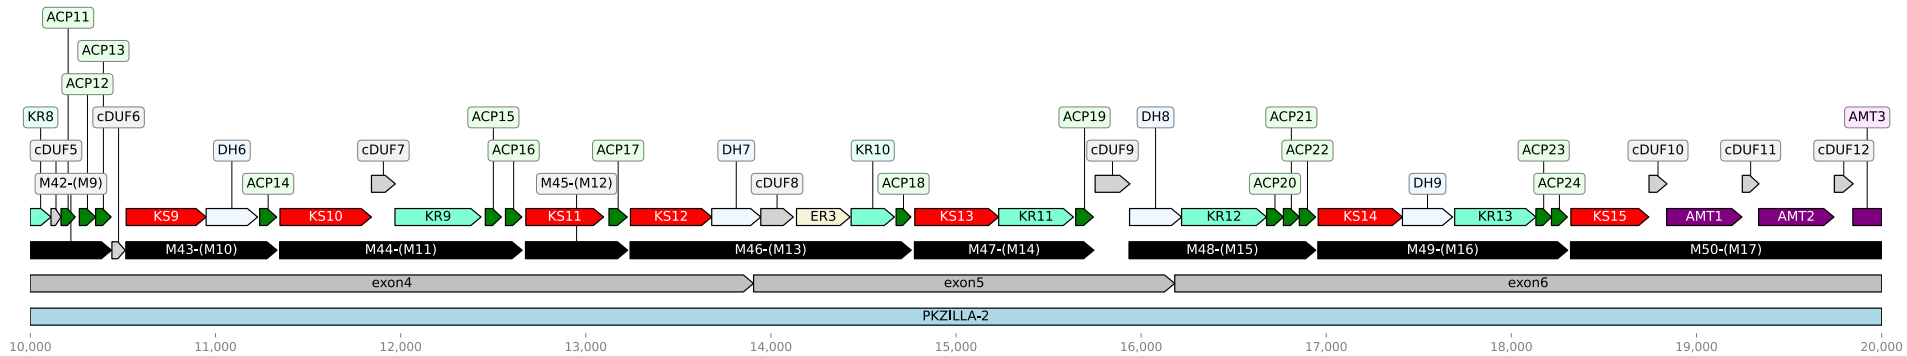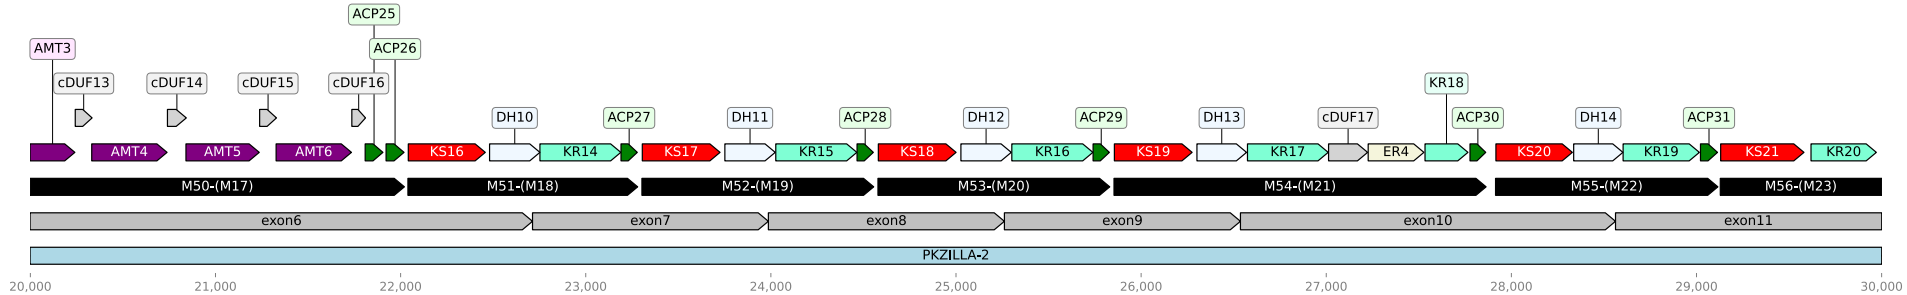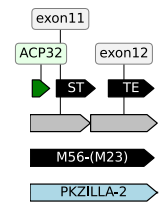



**Fig. S7:** Graphical plot of non-length-normalized PKZILLA-2 polypeptide (light blue), PKS modules (black), domains (varied colors), and unannotated cDUFs (light gray), and the relationship of shown regions with their source exons (dark gray). Plot generated with DNA Features Viewer (77). Source files, scripts, and resulting plots available on Zenodo (doi:[10.5281/zenodo.10093617](https://doi.org/10.5281/zenodo.10093617)).

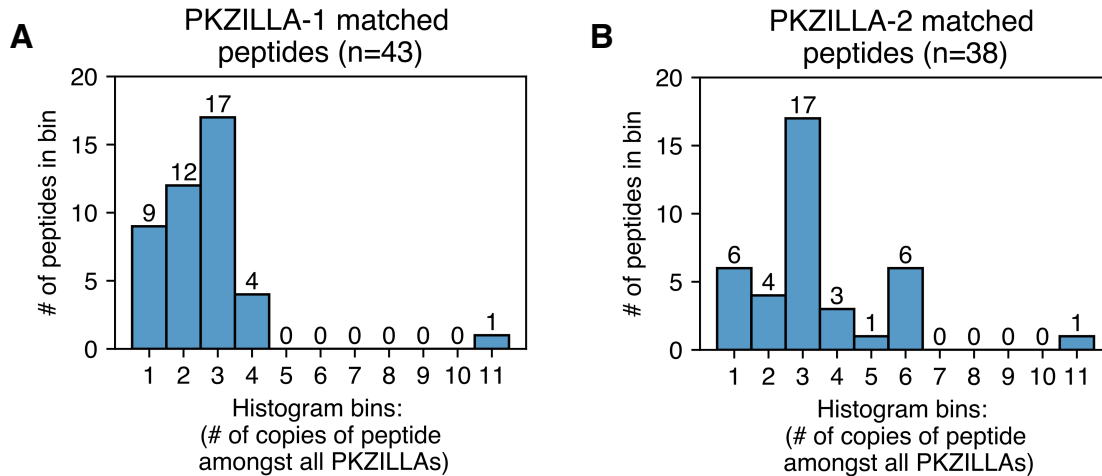

**Fig. S8:** Histogram of proteomics detected peptides binned by the number of times the specific peptide occurs within the PKZILLA polypeptides of the *Prymnesium parvum* 12B1 proteome. The majority of detected peptides from the PKZILLAs are present  $\geq 2$  times. These peptides were only present in the PKZILLA gene models and were not found anywhere else in 6-frame translations of the 12B1 genome (doi:[10.5281/zenodo.10028959](https://doi.org/10.5281/zenodo.10028959)). Source data, workflow, and plots available on Zenodo (doi:[10.5281/zenodo.10028959](https://doi.org/10.5281/zenodo.10028959)).

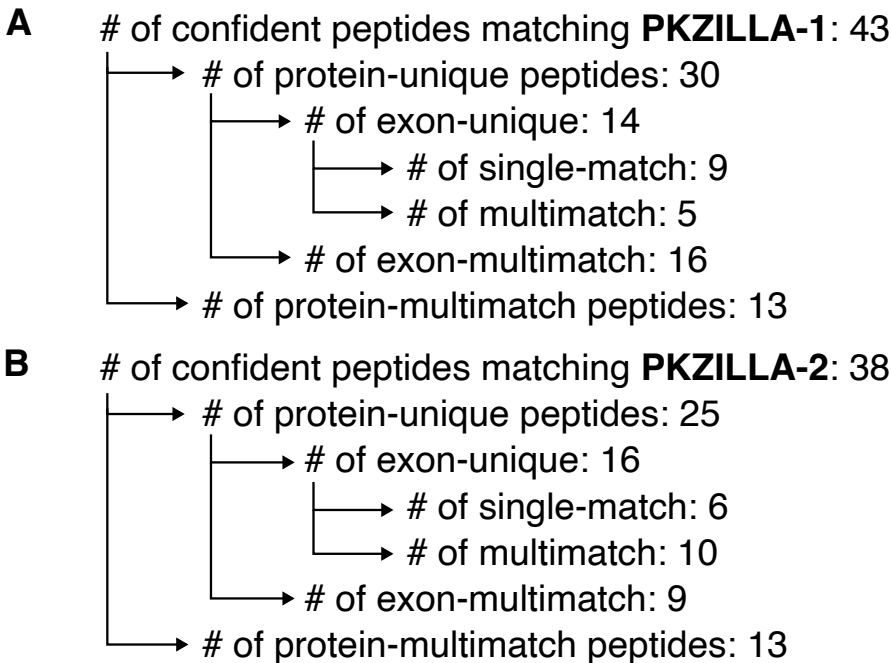

**Fig. S9:** Hierarchical classification of proteomics detected peptides. **(A)** PKZILLA-1, source values from Zenodo file 'PKZILLA-1\_classify\_peptides.txt' and **(B)** PKZILLA-2, source values from Zenodo file 'PKZILLA-2\_classify\_peptides.txt'. Source data, workflow, and these derived data available on Zenodo (doi:[10.5281/zenodo.10028959](https://doi.org/10.5281/zenodo.10028959)).

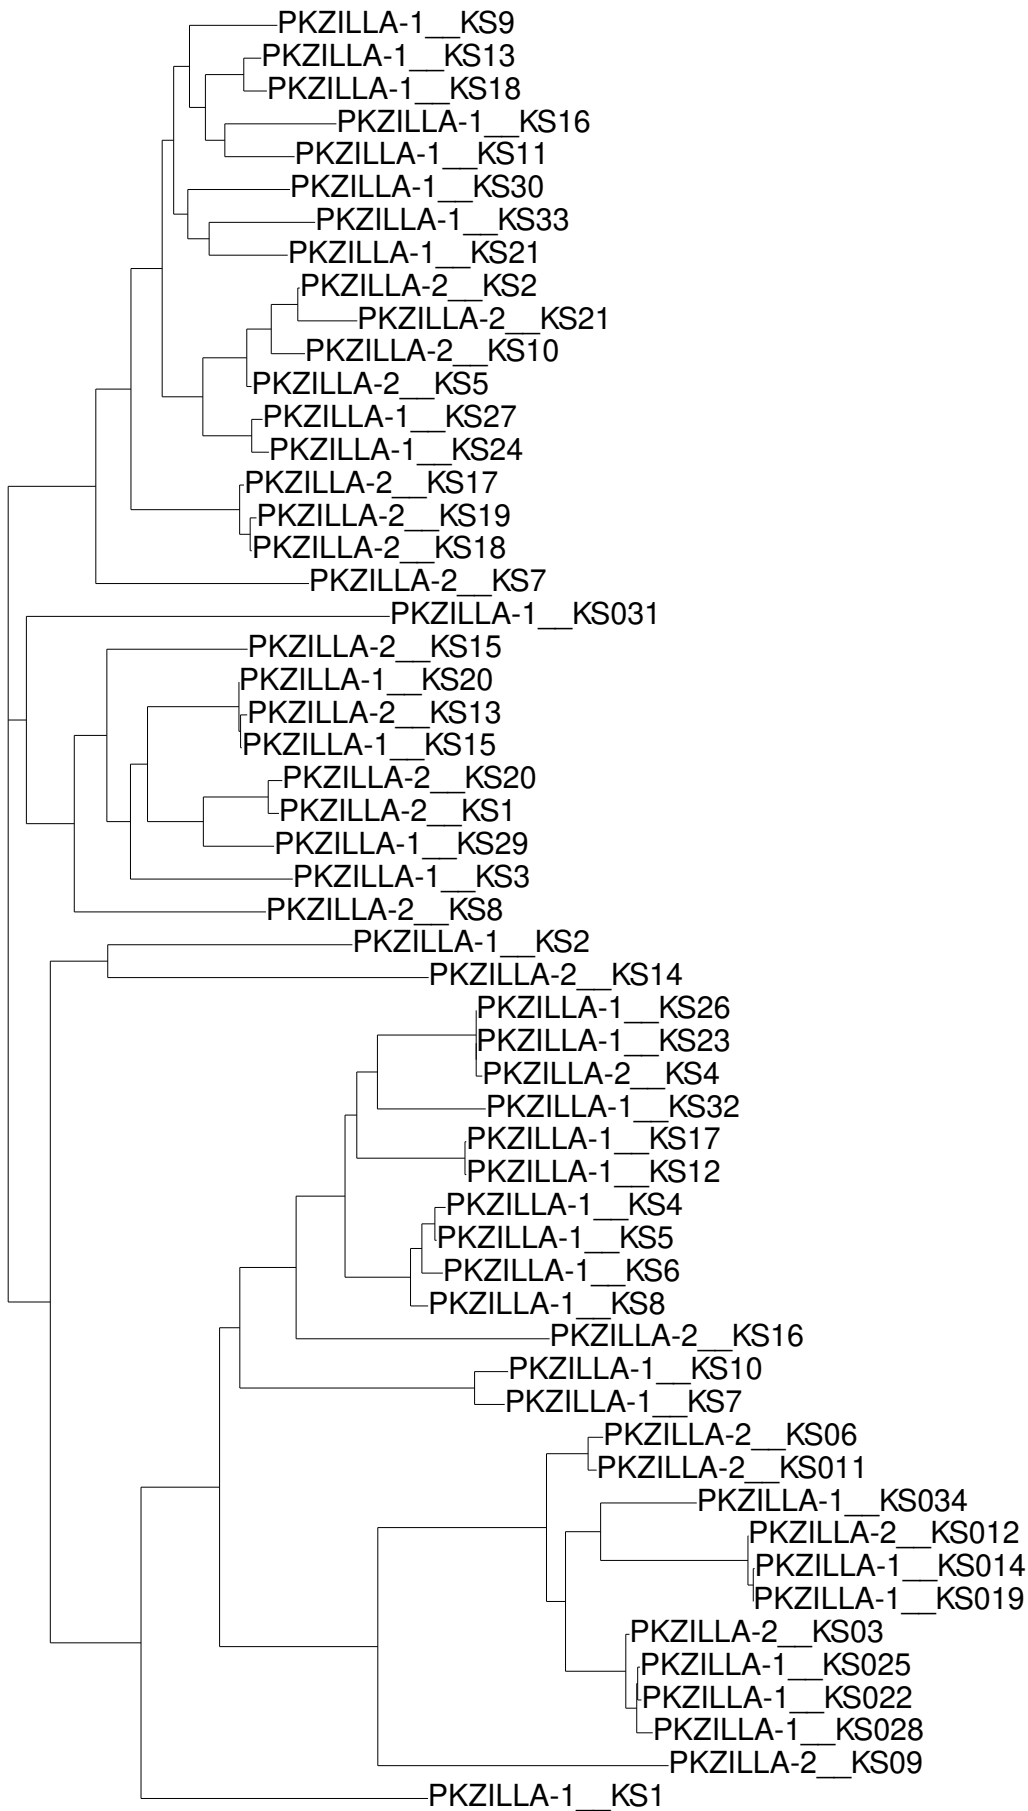

0.500191

**Fig. S10:** Phylogenetic analysis of PKZILLA ketosynthase (KS) and non-elongating KS (KS0) domains. Sequences were multiple sequence aligned with kalign2 (58) and the unrooted phylogeny calculated with raxml-ng (92) using model LG+G4m without bootstraps. Plots generated with ete3 (93). Branch lengths are drawn to scale and indicate the number of substitutions per site. Source data, workflow, results, and plots available on Zenodo (doi:[10.5281/zenodo.10152638](https://doi.org/10.5281/zenodo.10152638)).

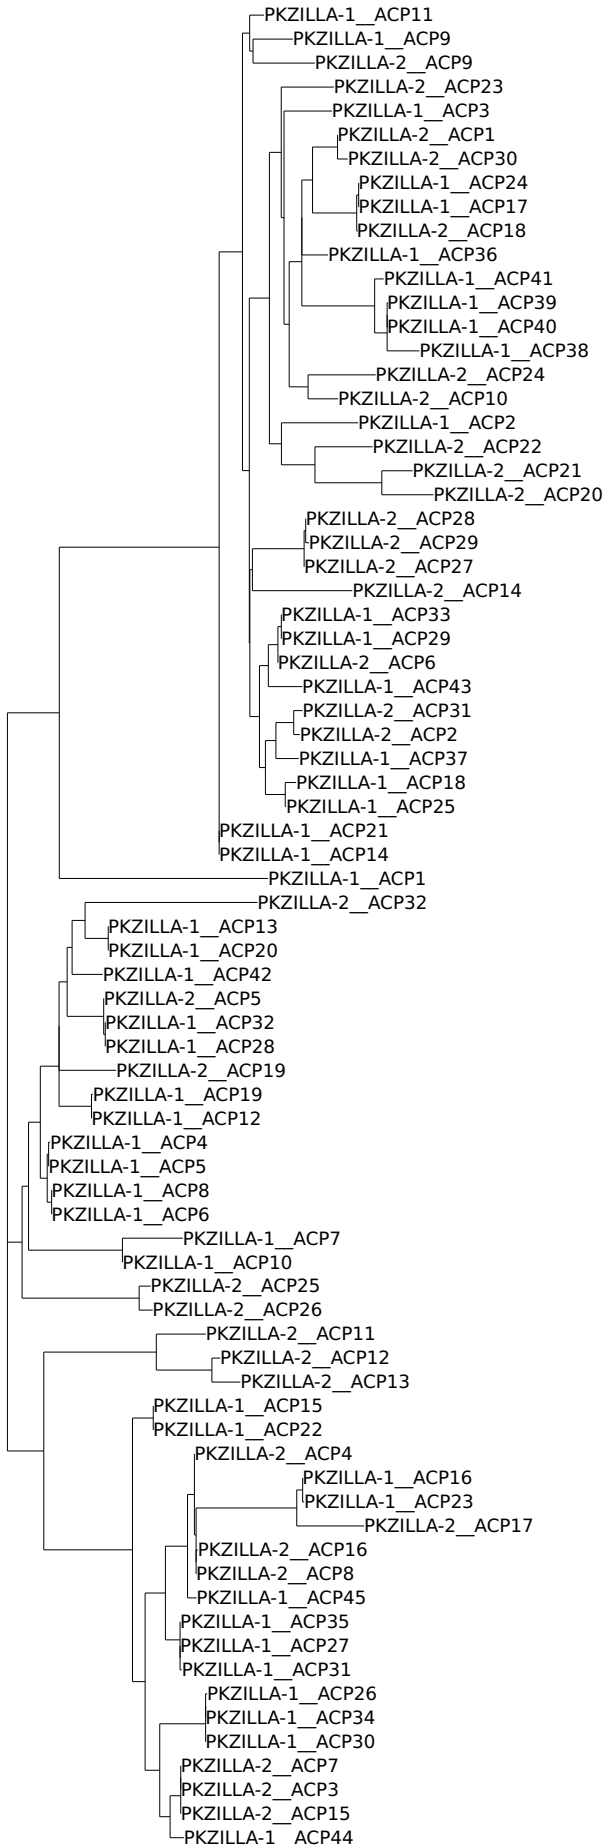

0.501015

**Fig. S11:** Phylogenetic analysis of PKZILLA acyl carrier protein (ACP) domains. Sequences were multiple sequence aligned with kalign2 (58) and the unrooted phylogeny calculated with raxml-ng (92) using model LG+G4m without bootstraps. Plots generated with ete3 (93). Branch lengths are drawn to scale and indicate the number of substitutions per site. Source data, workflow, results, and plots available on Zenodo (doi:[10.5281/zenodo.10152638](https://doi.org/10.5281/zenodo.10152638)).

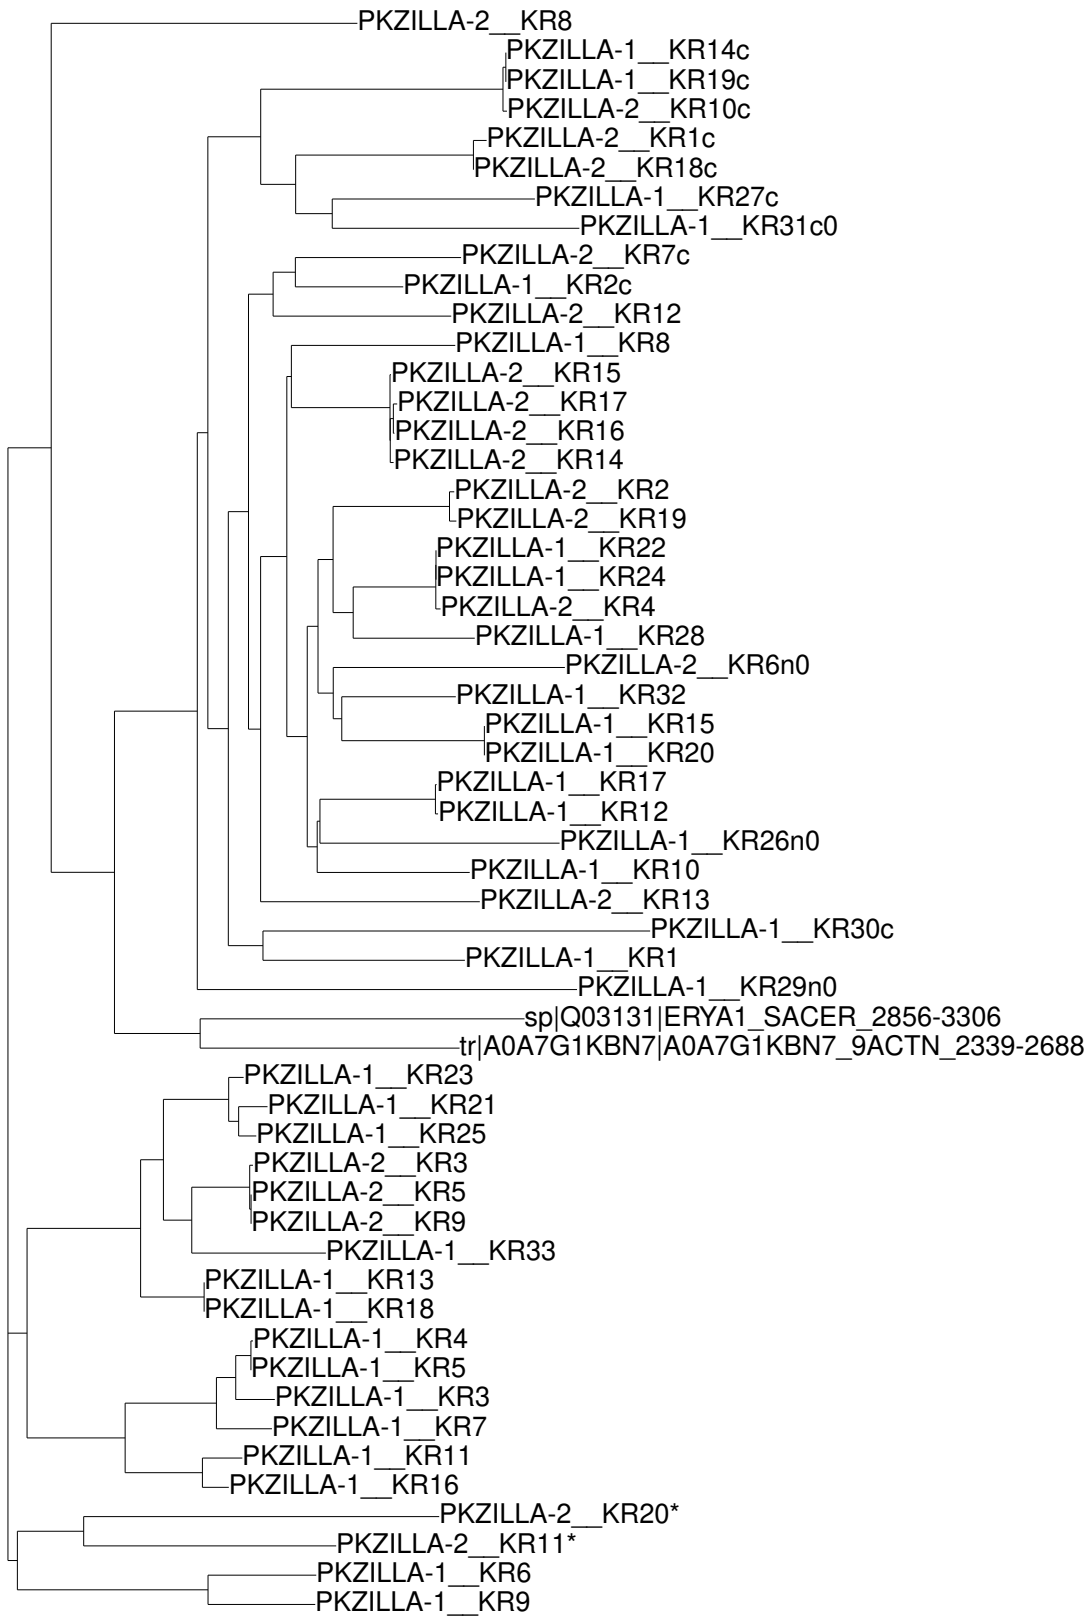

0.501291



**Fig. S12:** Phylogenetic analysis of PKZILLA ketoreductase (KR) domains and select representative KR domains from Uniprot. Sequences were multiple sequence aligned with kalign2 (58) and the unrooted phylogeny calculated with raxml-ng (92) using model LG+G4m without bootstraps. Plots generated with ete3 (93). Branch lengths are drawn to scale and indicate the number of substitutions per site. KR domains are annotated as KR/KRf, KRn, KRc depending on their respective classification as a full length non-split KR, a split KR N-terminal subdomain, or a split KR C-terminal subdomain, and “0” is appended to the domain name if the active site residues suggest the domain is catalytically inactive. KR\* domains would be expected to be active based on the biosynthetic model, but are bioinformatically predicted to be inactive (table S9), and thus may be false positive predictions of inactivity caused by divergent catalytic properties. For further details on catalytic activity determination via active site analysis, see “Analysis of active site residues within PKZILLA PKS domains” in the Materials and Methods and the associated Zenodo item (doi:[10.5281/zenodo.10028517](https://doi.org/10.5281/zenodo.10028517)). Source data, workflow, results, and plots available on Zenodo (doi:[10.5281/zenodo.10152638](https://doi.org/10.5281/zenodo.10152638)).

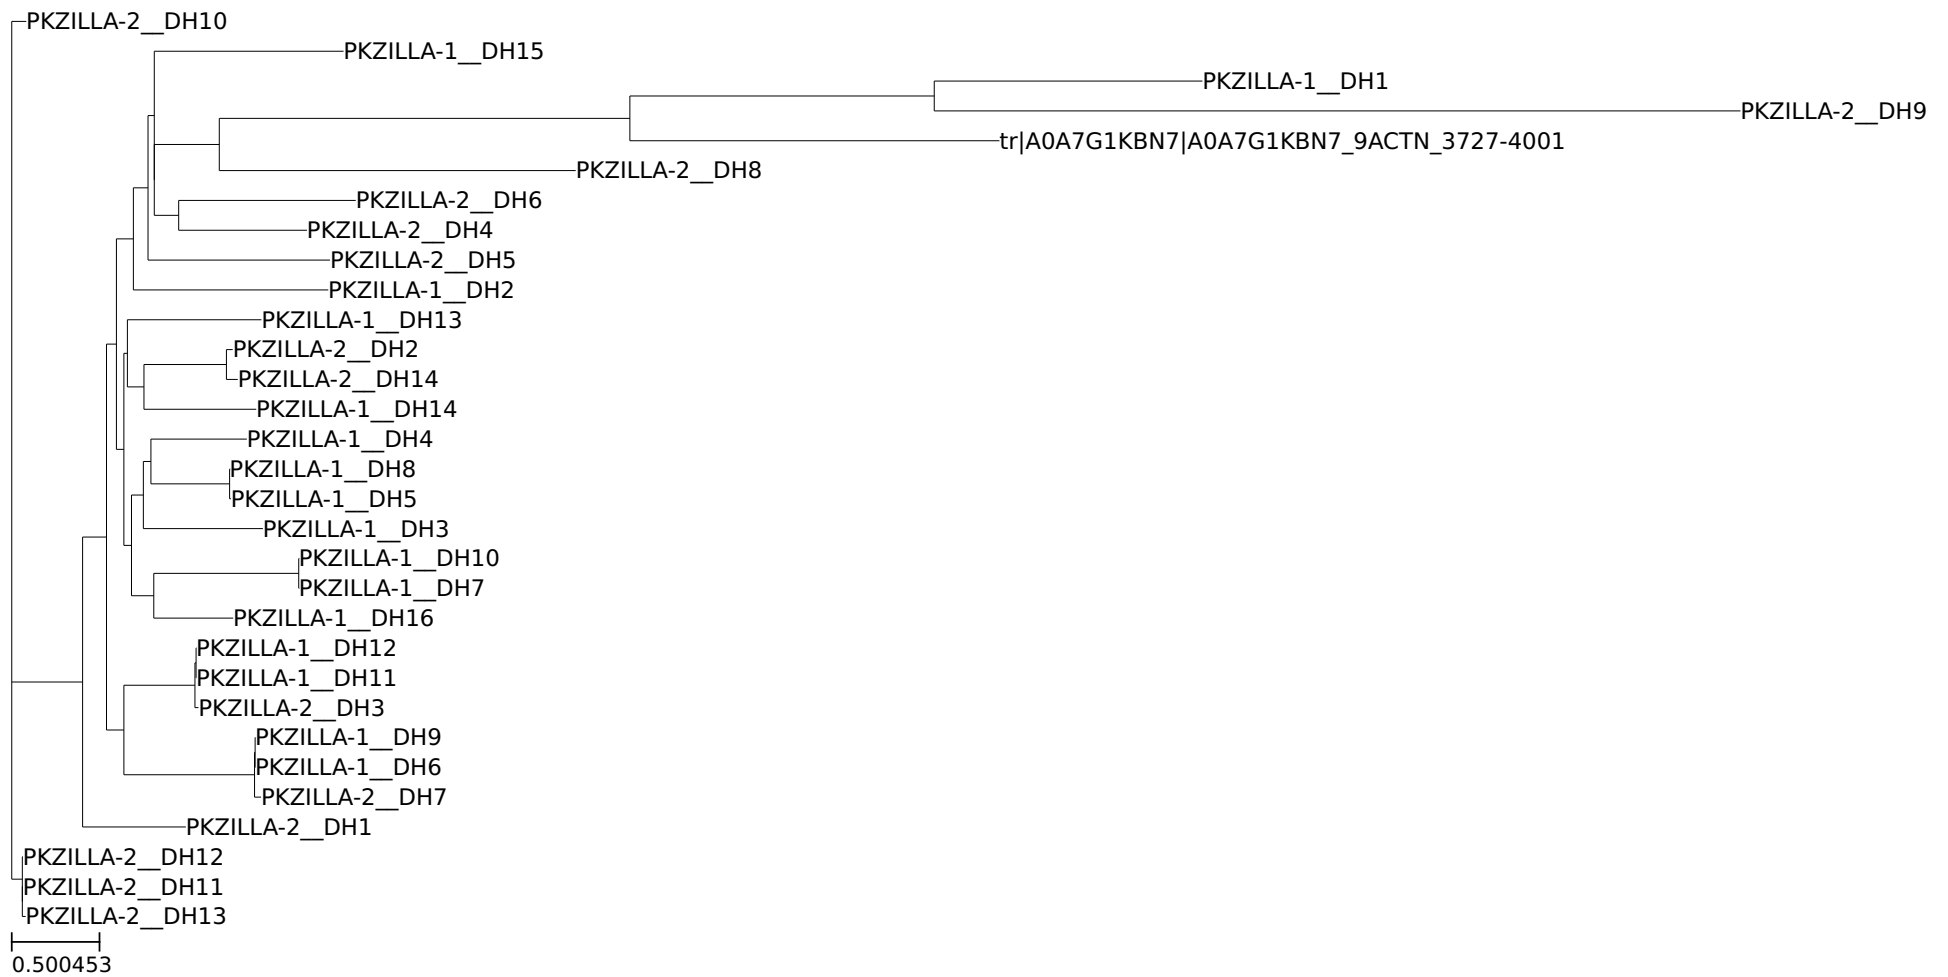

**Fig. S13:** Phylogenetic analysis of PKZILLA dehydratase (DH) domains and select representative DH domains from Uniprot. Sequences were multiple sequence aligned with kalign2 (58) and the unrooted phylogeny calculated with raxml-ng (92) using model LG+G4m without bootstraps. Plots generated with ete3 (93). Branch lengths are drawn to scale and indicate the number of substitutions per site. Source data, workflow, results, and plots available on Zenodo (doi:[10.5281/zenodo.10152638](https://doi.org/10.5281/zenodo.10152638))

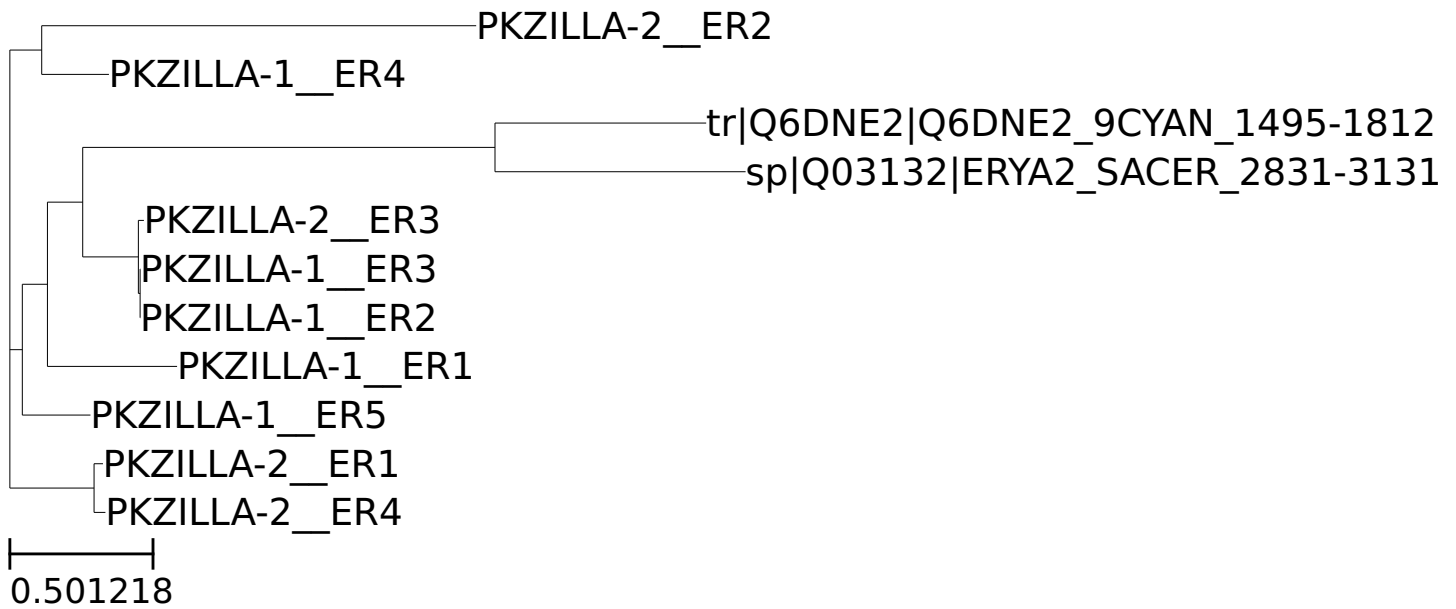

**Fig. S14:** Phylogenetic analysis of PKZILLA enoyl reductase (ER) domains and select representative ER domains from Uniprot. Sequences were multiple sequence aligned with kalign2 (58) and the unrooted phylogeny calculated with raxml-ng (92) using model LG+G4m without bootstraps. Plots generated with ete3 (93). Branch lengths are drawn to scale and indicate the number of substitutions per site. Source data, workflow, results, and plots available on Zenodo (doi:[10.5281/zenodo.10152638](https://doi.org/10.5281/zenodo.10152638)).

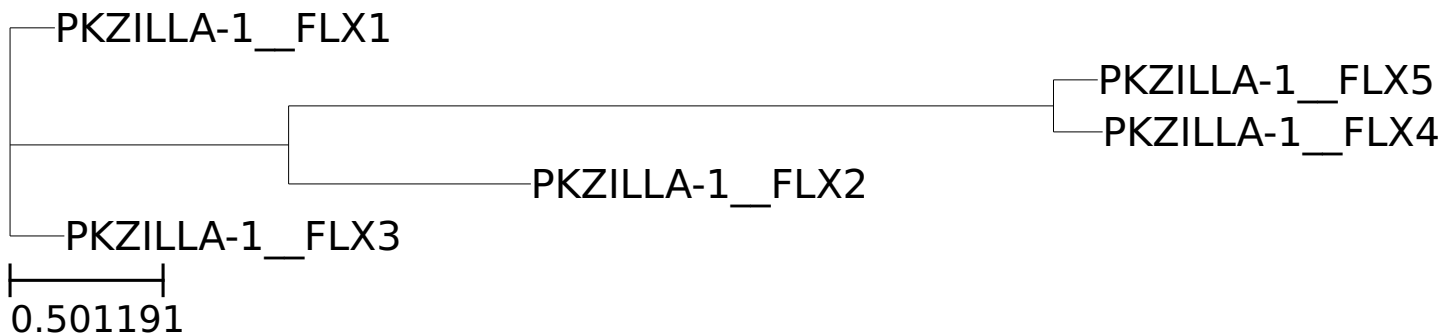

**Fig. S15:** Phylogenetic analysis of PKZILLA flavin oxygenase (FLX) domains. Sequences were multiple sequence aligned with kalign2 (58) and the unrooted phylogeny calculated with raxml-ng (92) using model LG+G4m without bootstraps. Plots generated with ete3 (93). Branch lengths are drawn to scale and indicate the number of substitutions per site. Source data, workflow, results, and plots available on Zenodo (doi:[10.5281/zenodo.10152638](https://doi.org/10.5281/zenodo.10152638)).



**Fig. S16:** Phylogenetic analysis of PKZILLA ketosynthase (KS) domains with an expansive set of comparable PKS domain sequences from Uniprot representing bacteria, fungi, green algae, dinoflagellates, haptophytes, and human fatty acid synthase (FAS). See table S10 for key for taxonomic interpretation. Remainder of sequence ID is the uniprot ID and N-terminal to C-terminal ascending domain number. Source data, workflow, and resulting plots available on Zenodo (doi:[10.5281/zenodo.10247217](https://doi.org/10.5281/zenodo.10247217)).

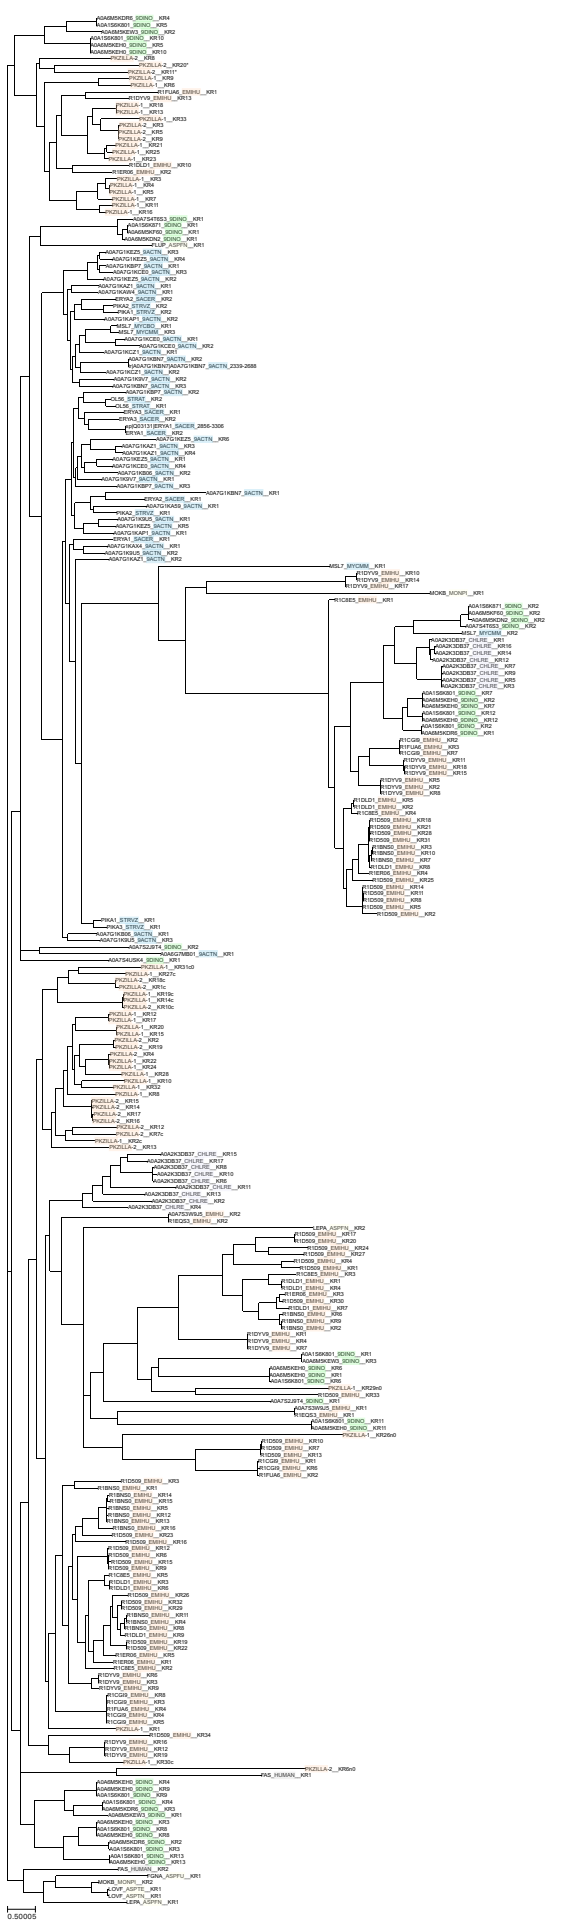

**Fig. S17:** Phylogenetic analysis of PKZILLA ketoreductase (KR) domains with an expansive set of comparable PKS domain sequences from Uniprot representing bacteria, fungi, green algae, dinoflagellates, haptophytes, and human fatty acid synthase (FAS). See table S10 for key for taxonomic interpretation. Remainder of sequence ID is the uniprot ID and N-terminal to C-terminal ascending domain number. Source data, workflow, and resulting plots available on Zenodo (doi:[10.5281/zenodo.10247217](https://doi.org/10.5281/zenodo.10247217)).



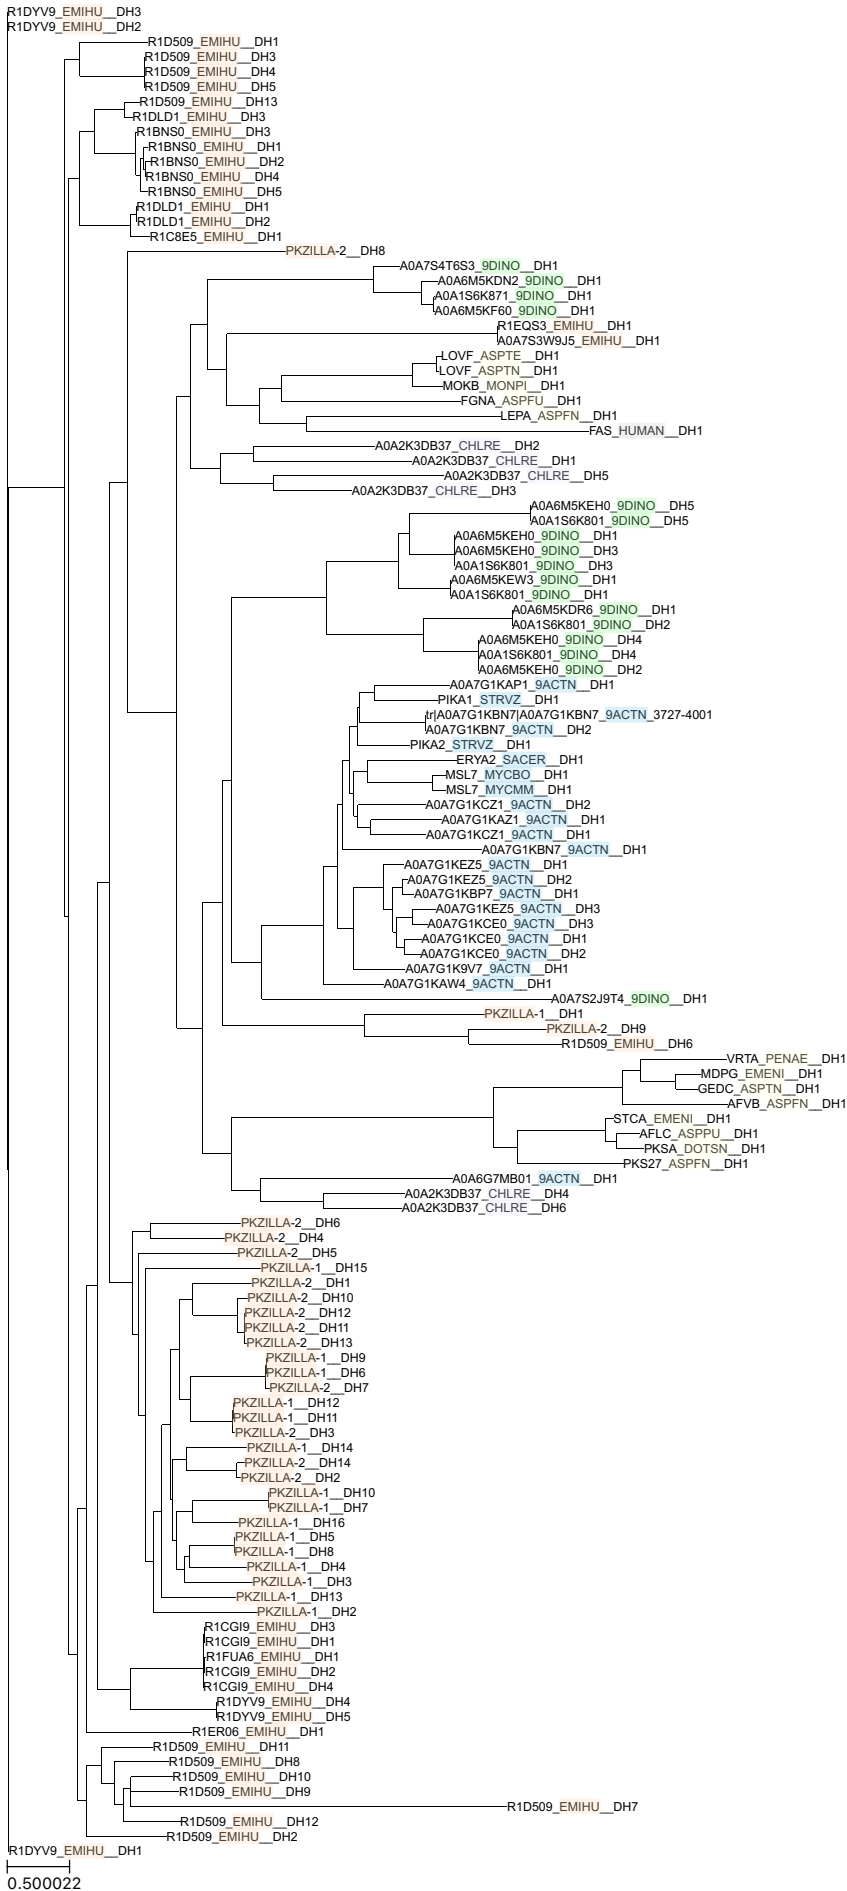

**Fig. S18:** Phylogenetic analysis of PKZILLA dehydratase (DH) domains with an expansive set of comparable PKS domain sequences from Uniprot representing bacteria, fungi, green algae, dinoflagellates, haptophytes, and human fatty acid synthase (FAS). See table S10 for key for taxonomic interpretation. Remainder of sequence ID is the uniprot ID and N-terminal to C-terminal ascending domain number. Source data, workflow, and resulting plots available on Zenodo (doi:[10.5281/zenodo.10247217](https://doi.org/10.5281/zenodo.10247217)).

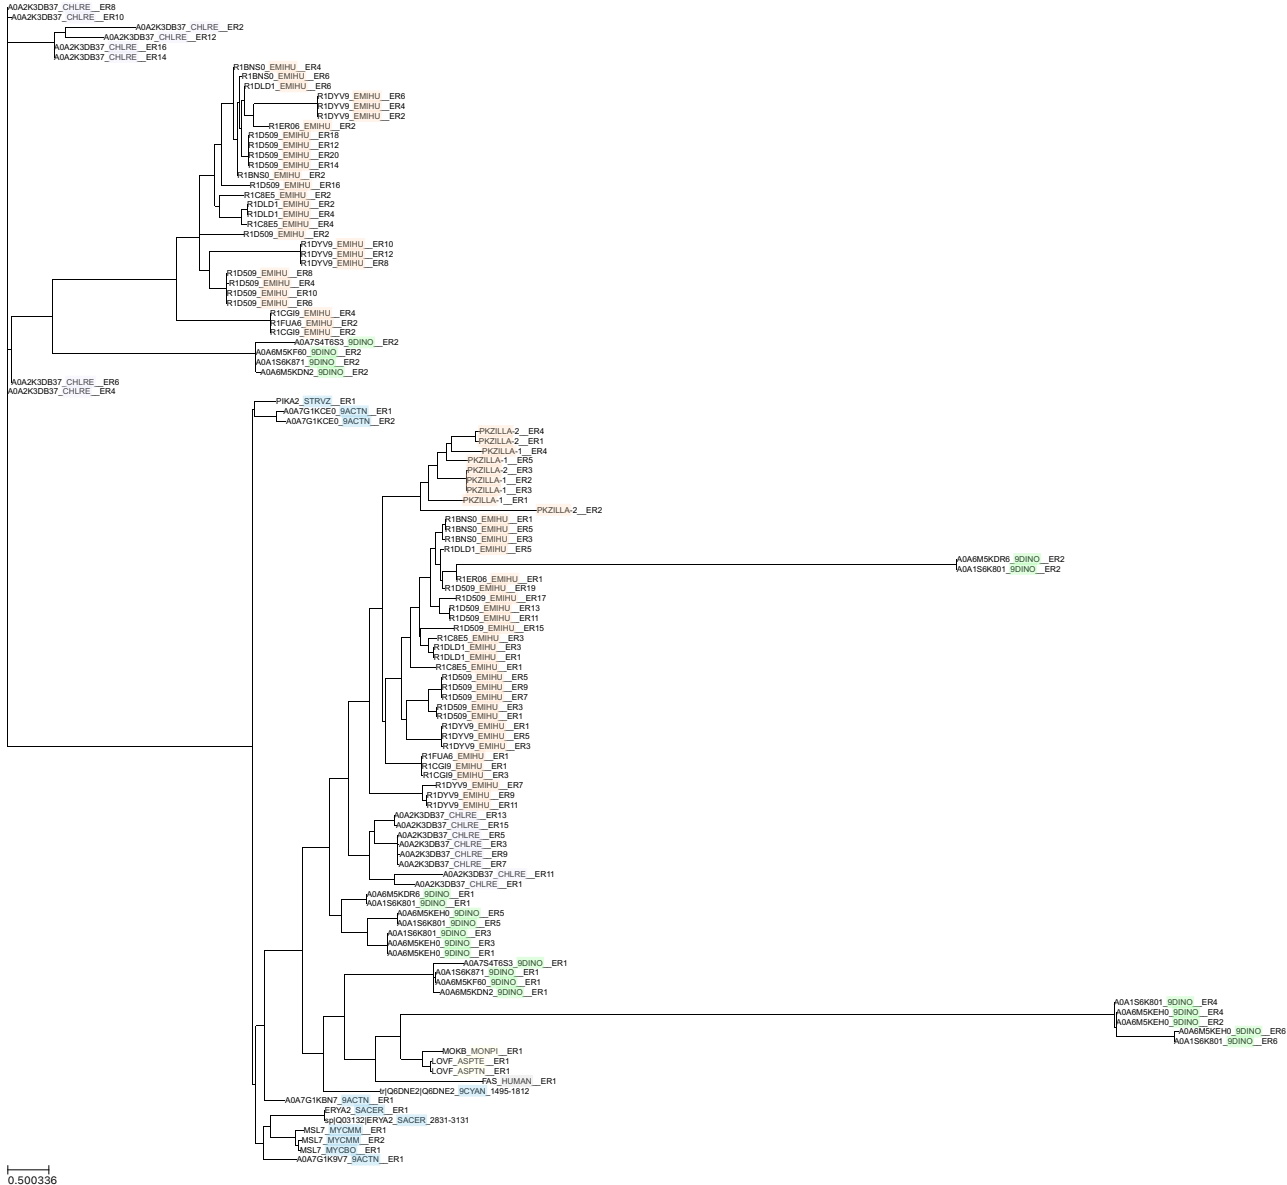

**Fig. S19:** Phylogenetic analysis of PKZILLA enoyl reductase (ER) domains with an expansive set of comparable PKS domain sequences from Uniprot representing bacteria, fungi, green algae, dinoflagellates, haptophytes, and human fatty acid synthase (FAS). See table S10 for key for taxonomic interpretation. Remainder of sequence ID is the uniprot ID and N-terminal to C-terminal ascending domain number. Source data, workflow, and resulting plots available on Zenodo (doi:[10.5281/zenodo.10247217](https://doi.org/10.5281/zenodo.10247217)).

# PKZILLA-1

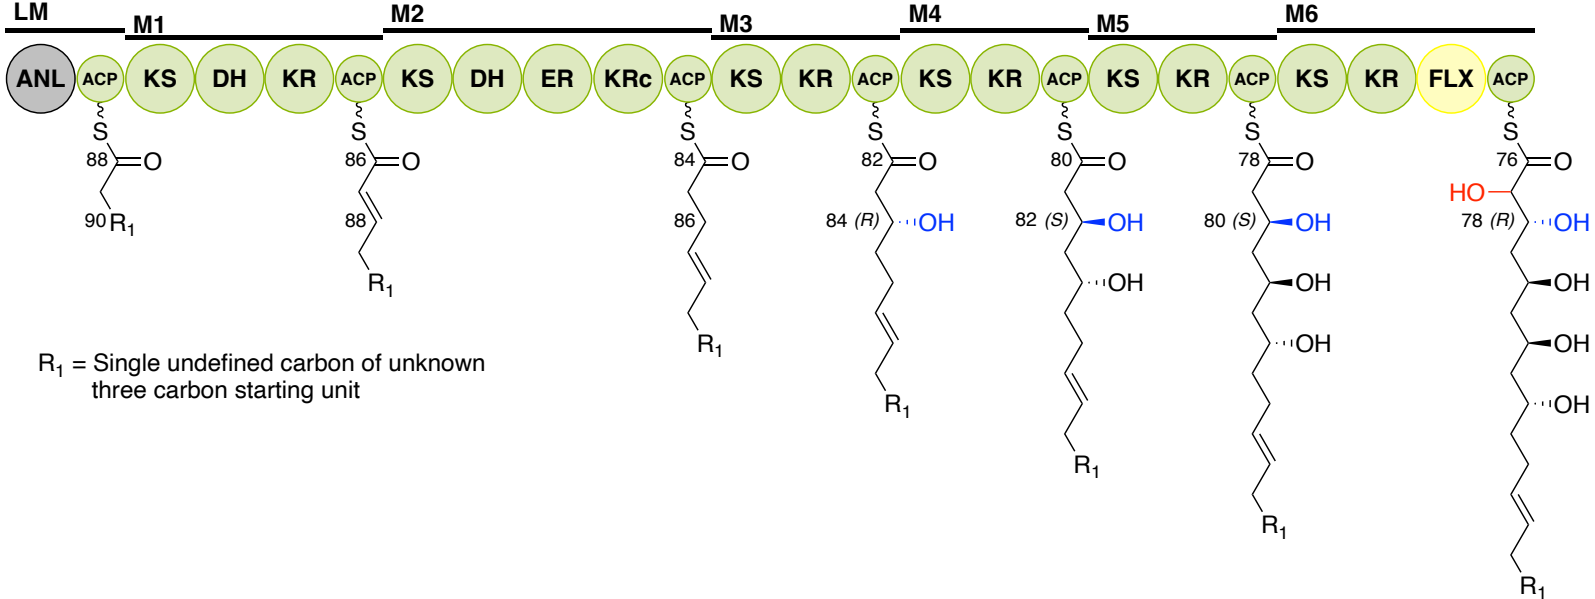

R<sub>1</sub> = Single undefined carbon of unknown three carbon starting unit

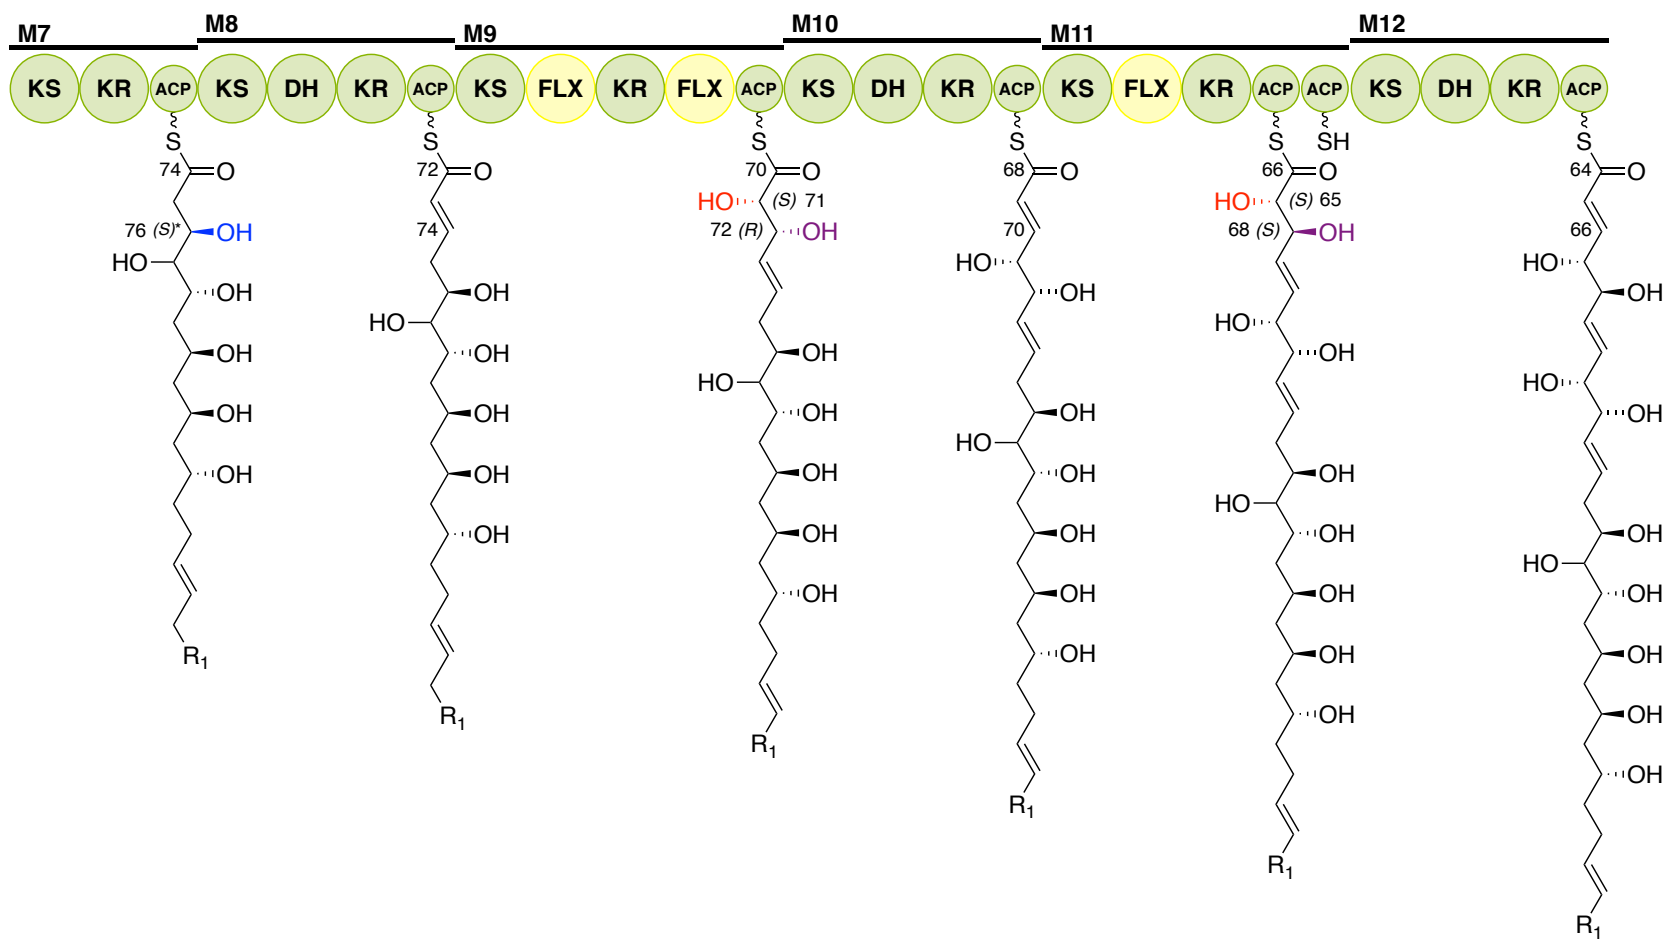

M13/M14 saturating bimodule (S2M)

M18/M19 saturating bimodule (S2M)

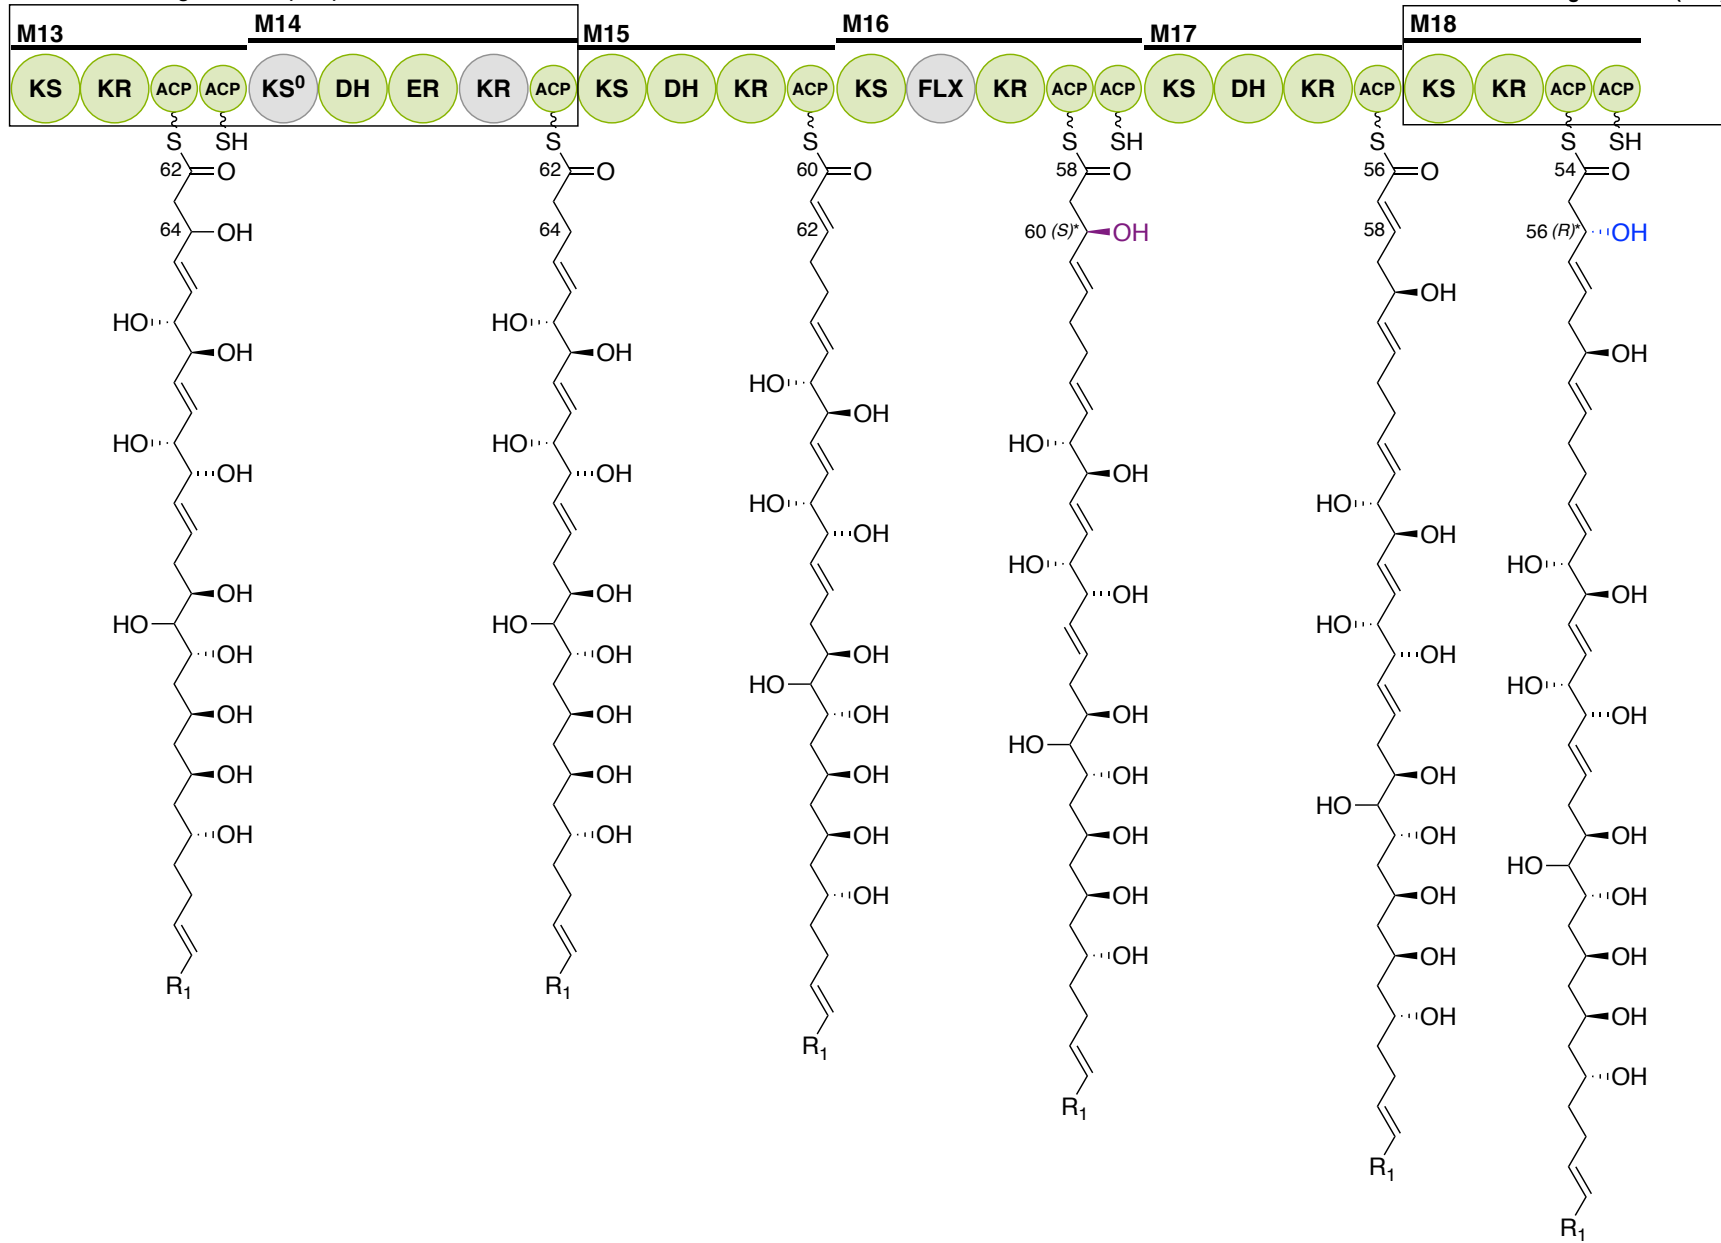

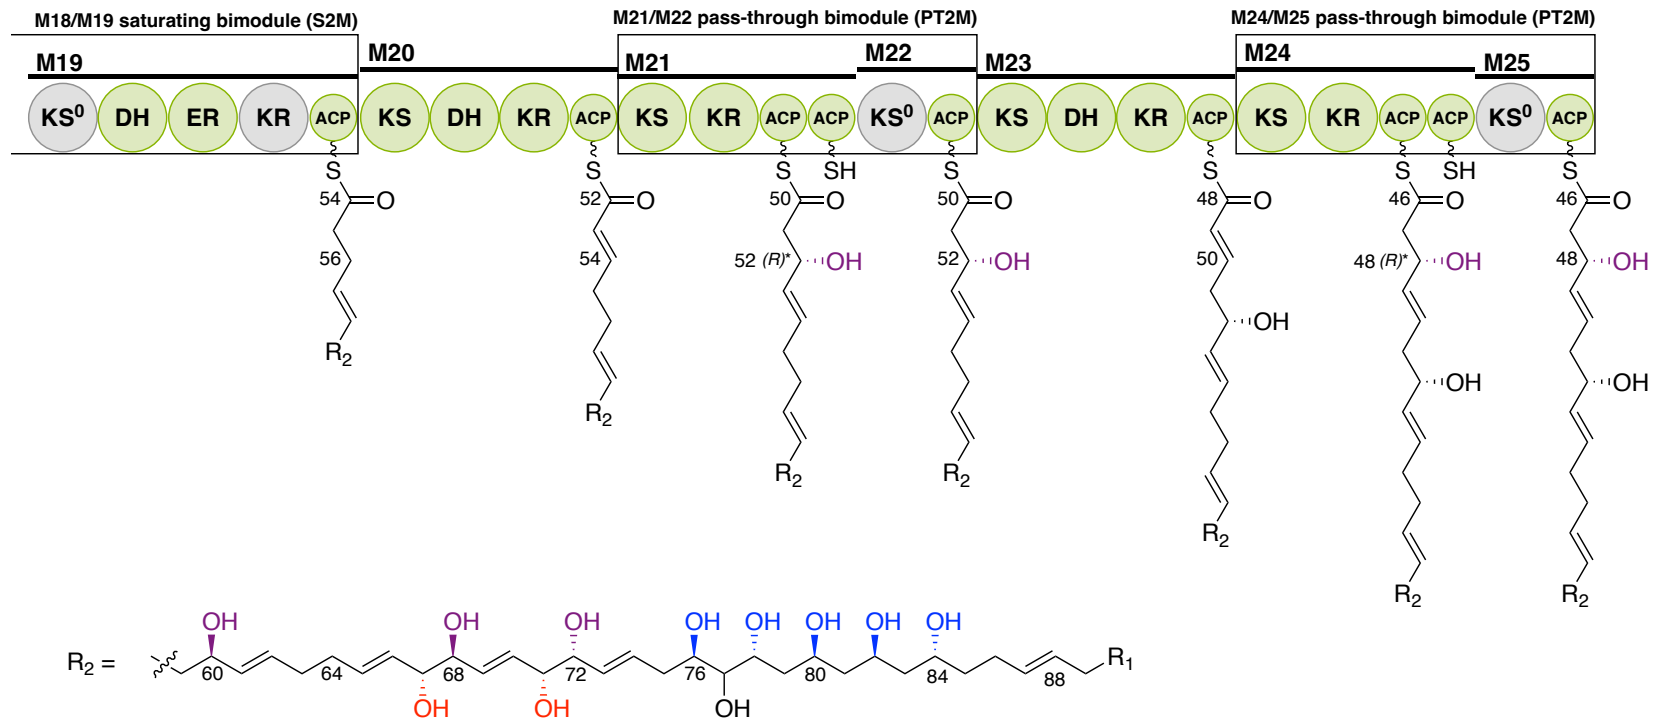

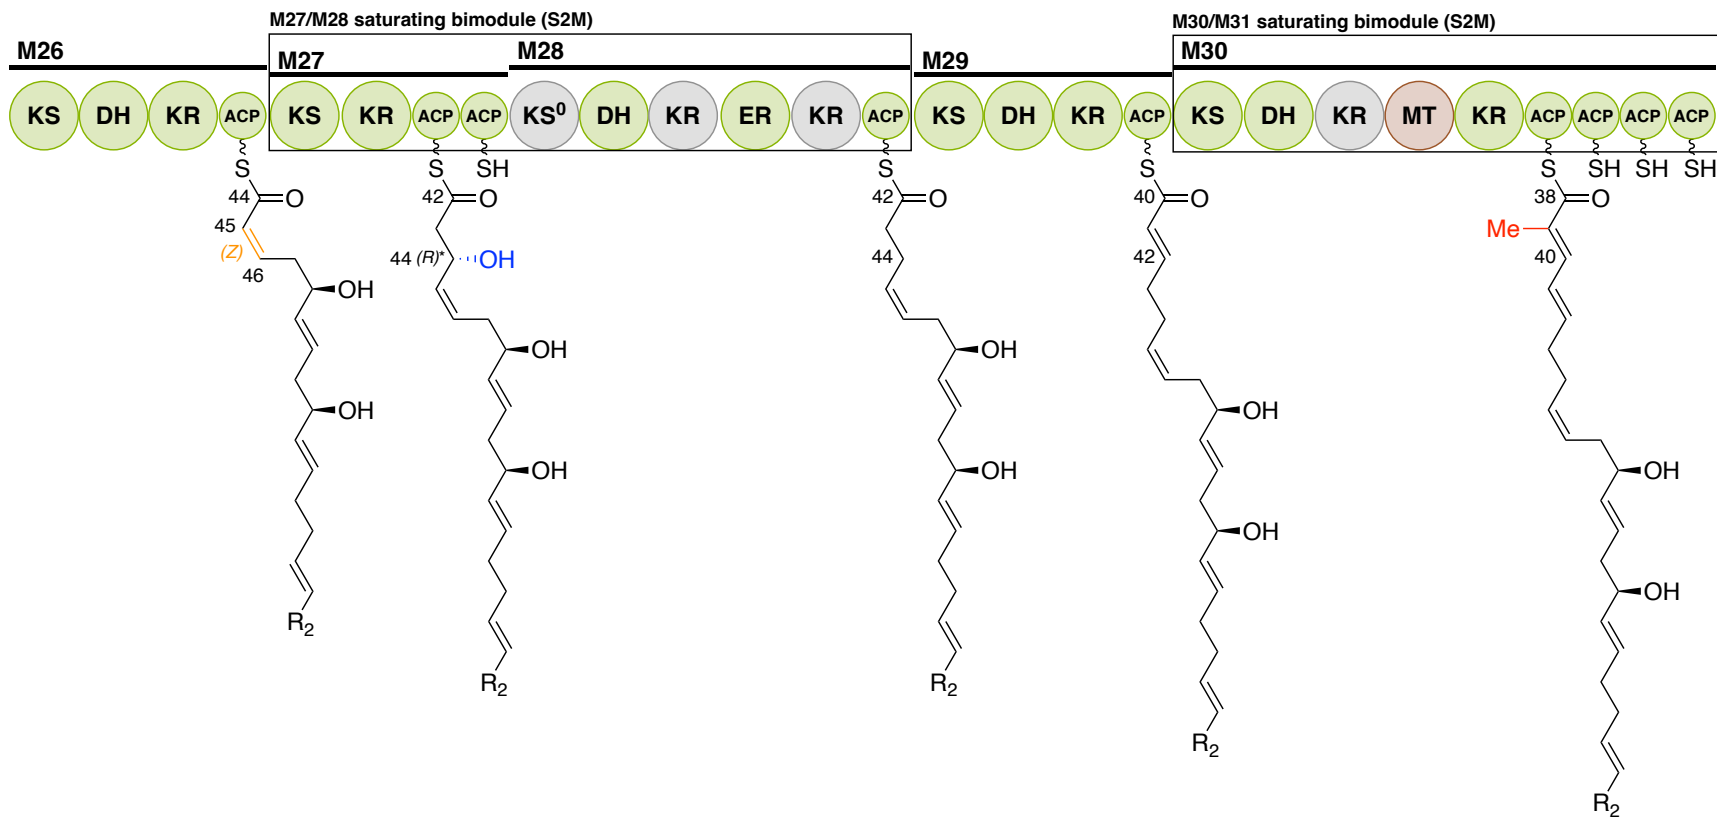



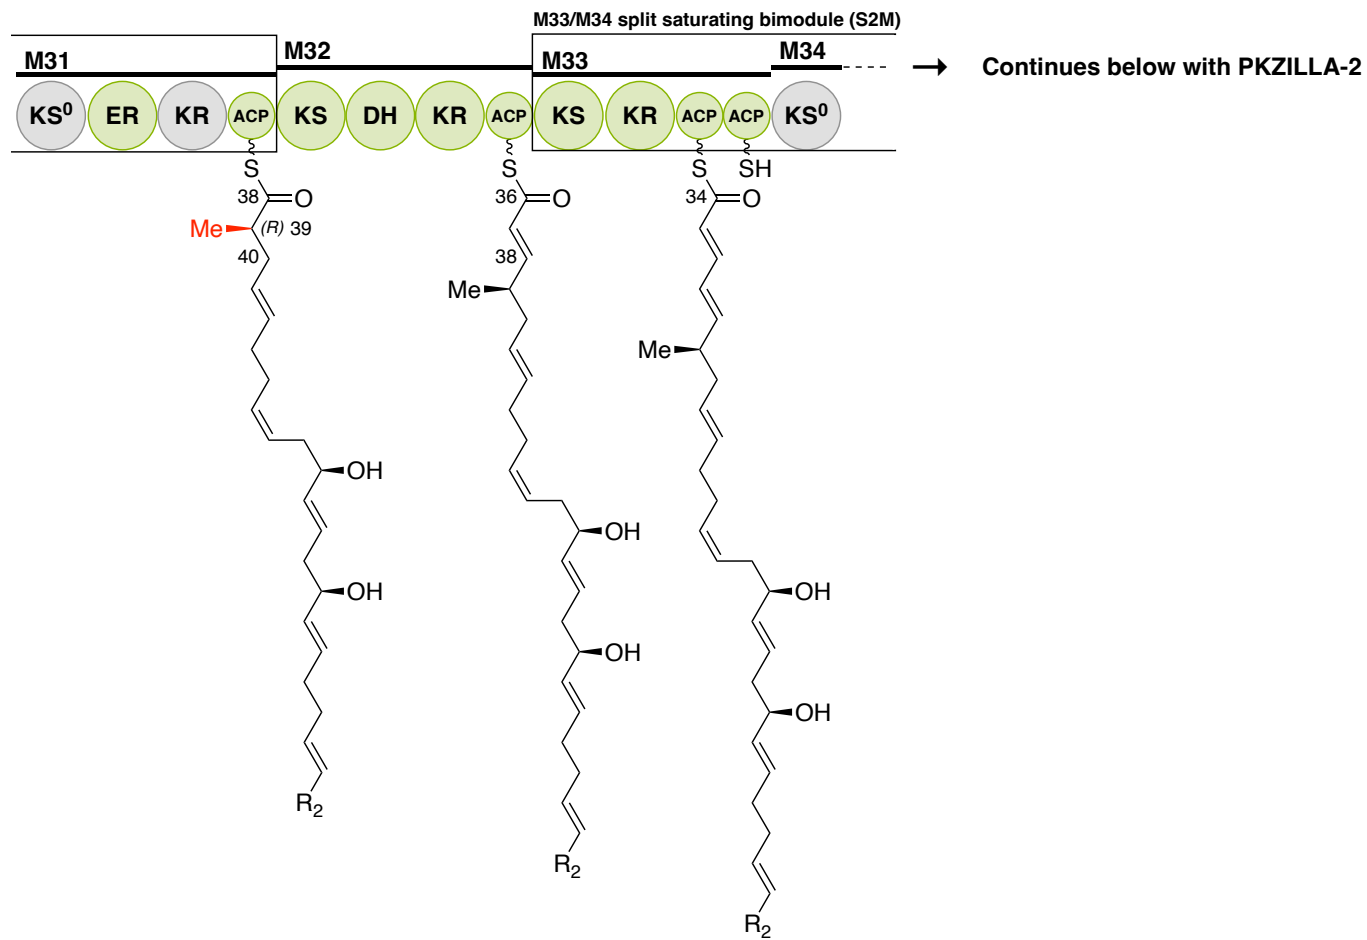

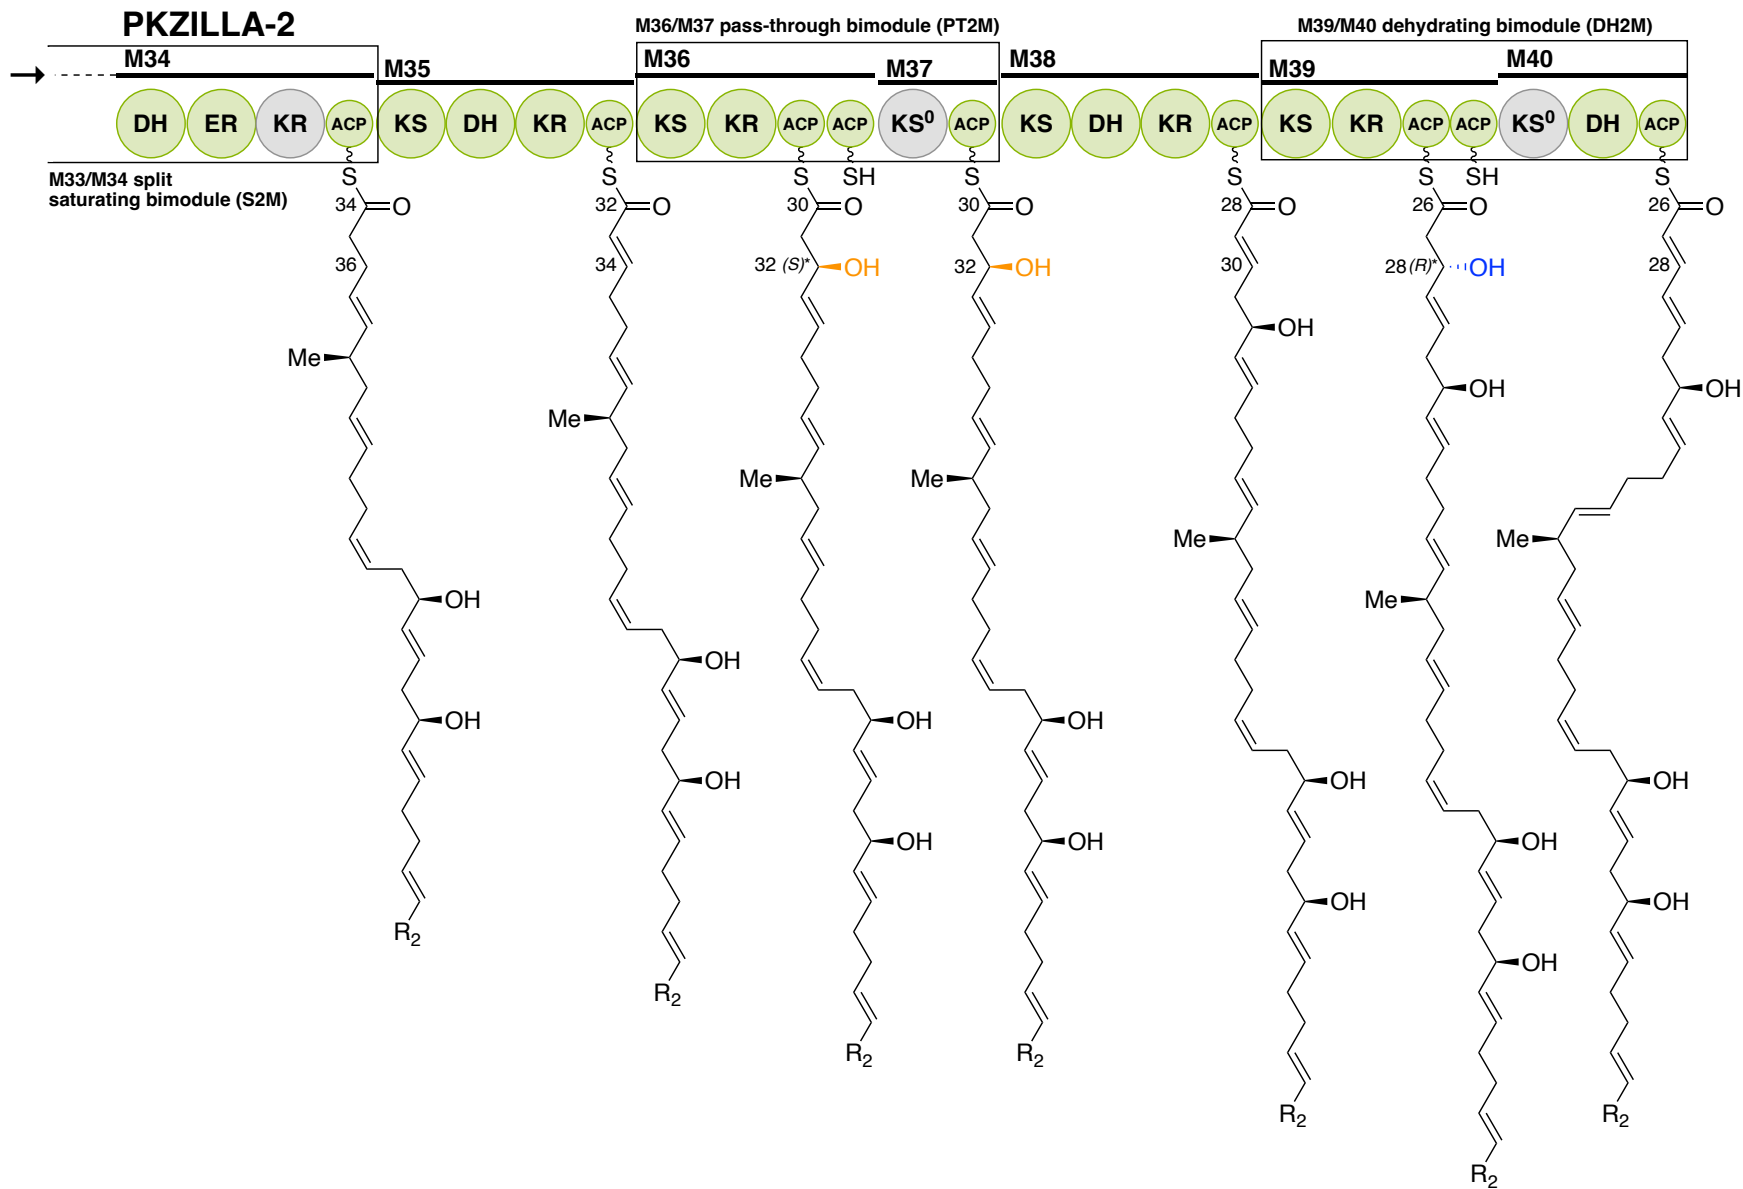

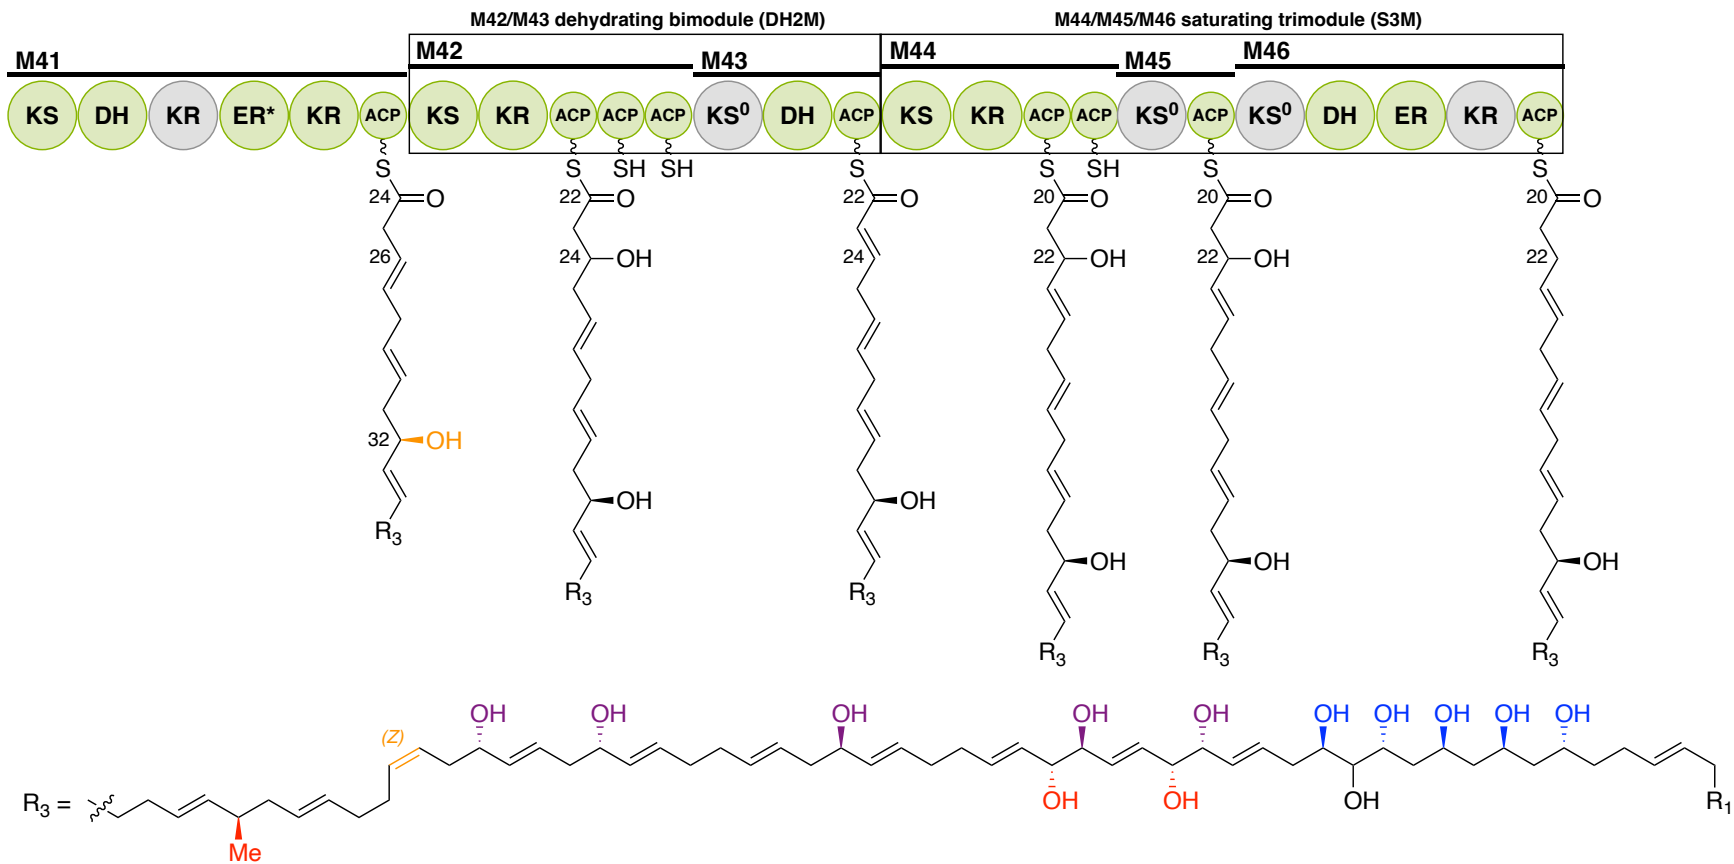

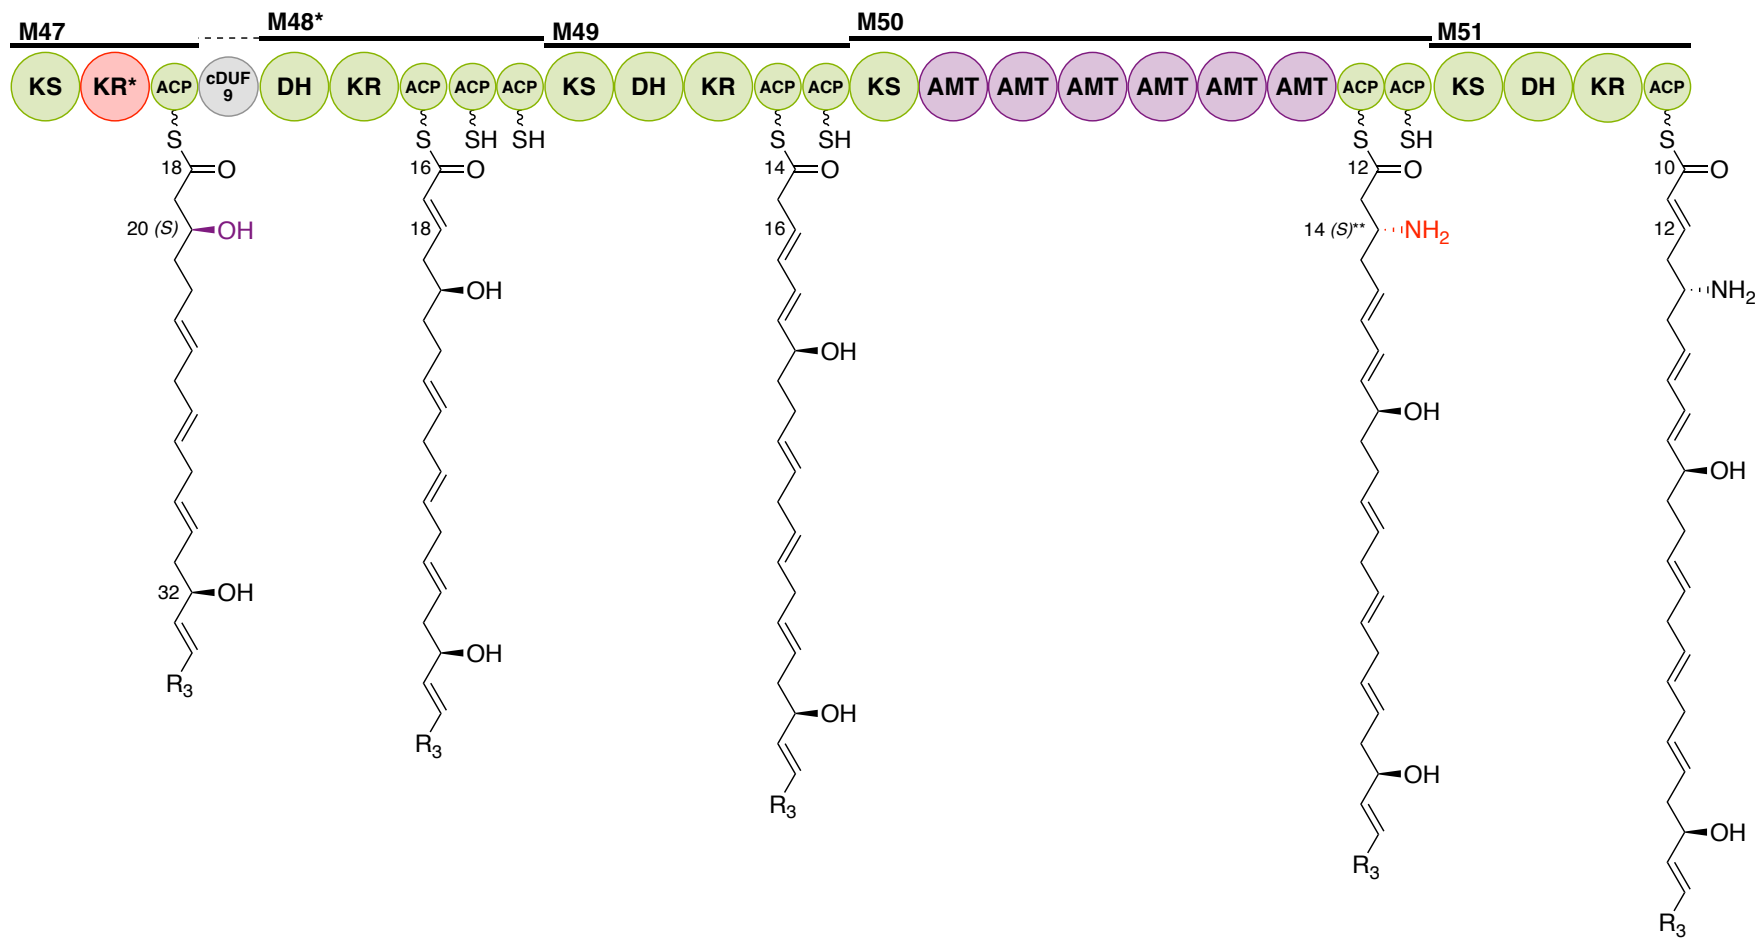

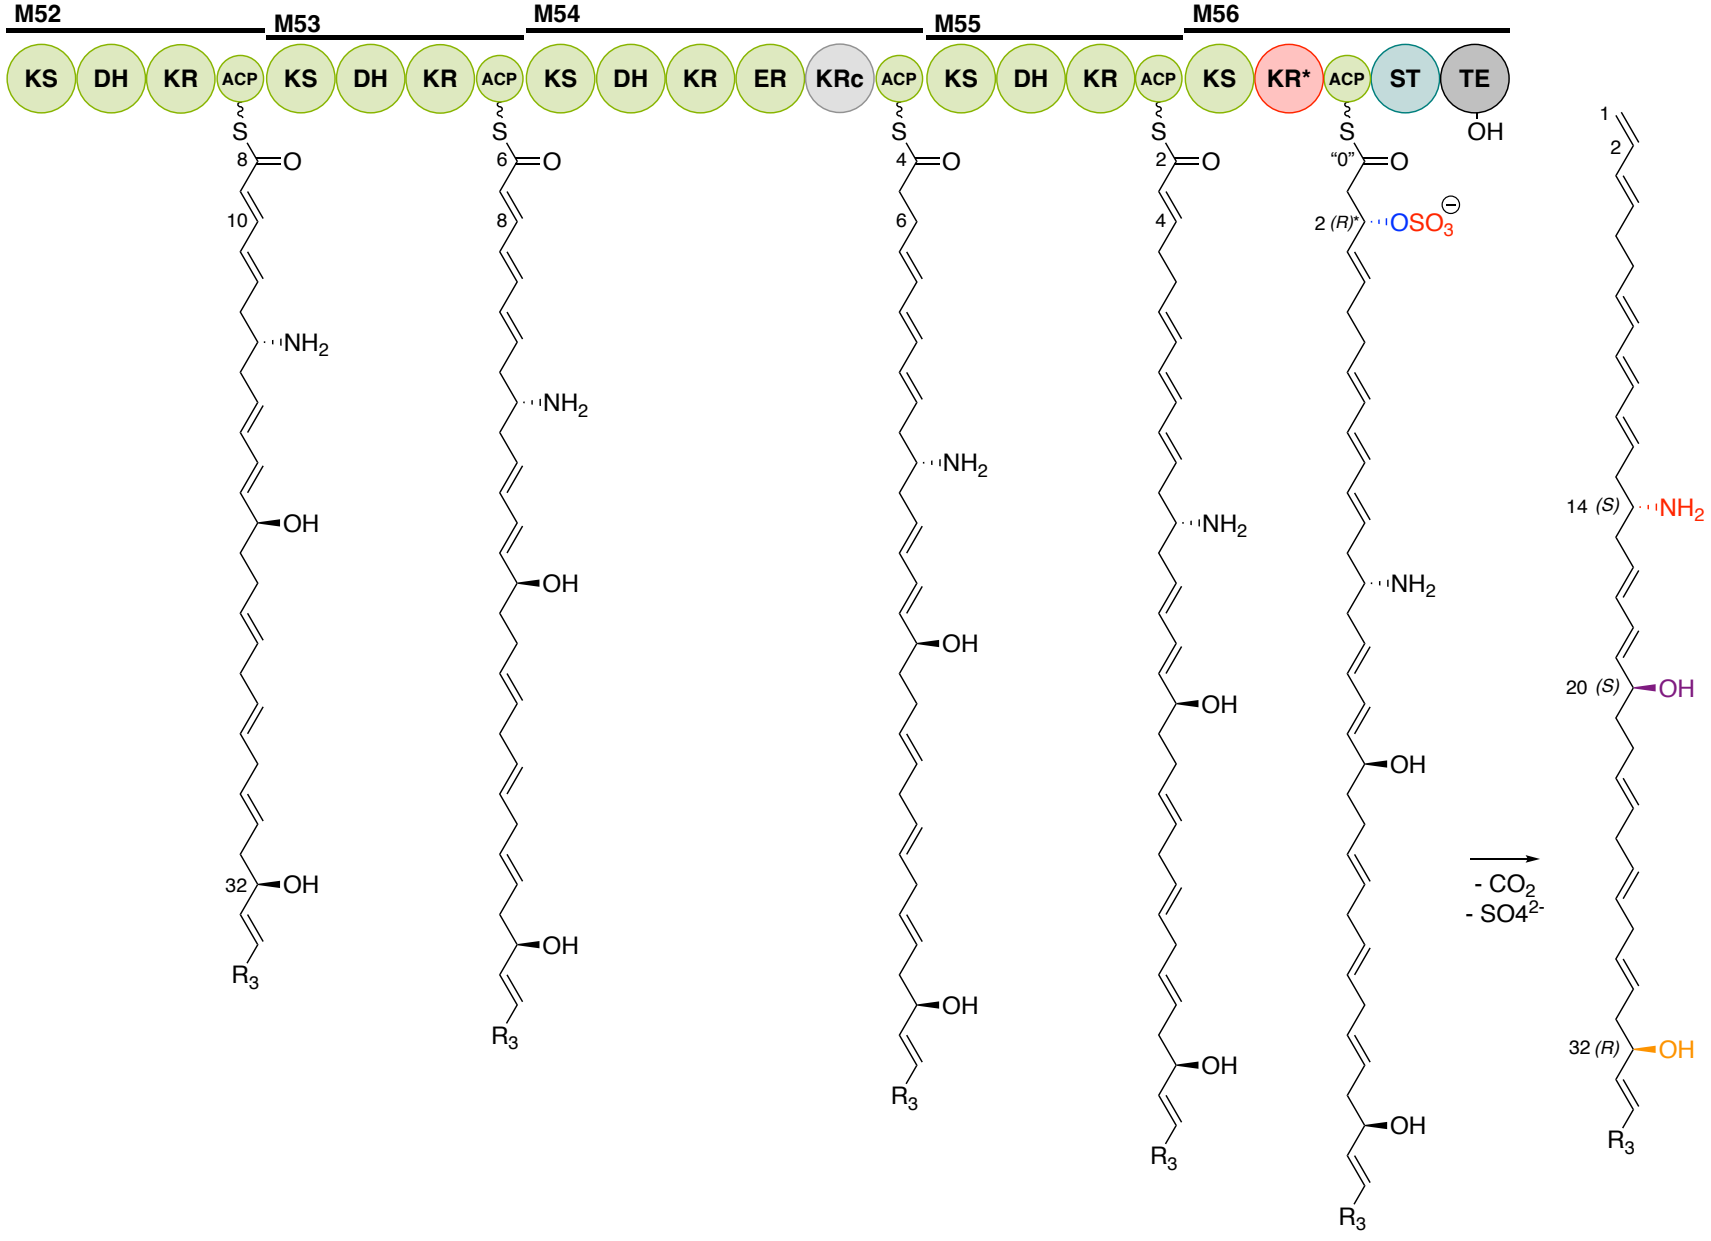

**Fig. S20:** Polyketide synthase assembly line model for PKZILLA-1/2. Domain abbreviations and color coding follows those used in Fig. 2, excepting that all KS, ACP, KR, DH, ER domains are shown as green. Light-gray colored domains are either predicted to be catalytically inactive from bioinformatic analysis (KRs), or trans-acylating rather than fully condensating (KS<sup>0</sup>s), or did not have an apparent attributable catalytic activity (i.e. M16 FLX) despite bioinformatic expectations of catalytic capability. Red domains (KR\*s) in M47 and M56, would be expected to be active based on the biosynthetic model, but are bioinformatically predicted to be inactive (table S9), and thus may be false positive predictions of inactivity caused by divergent catalytic properties. Red bond and atom coloration indicates functional groups installed by FLX, MT, AMT, and ST domains, or installed functional groups whose stereochemistry is known only from inferences from empirically reported or retrobiosynthetically inferred stereochemistry (Fig. 3) and does not have a bioinformatic prediction of stereochemistry (Table S12). Blue coloration indicates stereochemistry is only proposed from bioinformatics (Table S12). Purple coloration indicates a match between empirically reported or inferred stereochemical configurations and bioinformatic stereochemical predictions (Table S12). Orange coloration indicates a mis-match between empirically reported or inferred stereochemical/isomeric configurations and bioinformatic predictions (Table S12). \*=Due to inversion of Cahn–Ingold–Prelog priority when  $\gamma,\delta$  bond is an alkene vs saturated, or if the  $\gamma$  carbon has a hydroxyl,  $\gamma,\delta$  carbons were drawn as always saturated and without hydroxyls for the purposes of stereochemical assignment. \*\*=Stereochemical assignment inverted to match configuration on prymnesin, in both cases it is the same configuration barring an inversion of Cahn–Ingold–Prelog priority.

| Transcript ID | Gene ID        | Scaffold ID | Gene coord. start | Gene coord. end | Gene length (bp) | mRNA length (nt) | Exon count | Closest PKS gene ID | Closest PKS gene distance (kbp) | tpm_day    | tpm_night |
|---------------|----------------|-------------|-------------------|-----------------|------------------|------------------|------------|---------------------|---------------------------------|------------|-----------|
| PKZILLA-1     | 12B1gPKZILLA-1 | 12B1-Scaf17 | 2286087           | 2423367         | 137280           | 136088           | 17         |                     |                                 | 1.11135    | 0.713157  |
| PKZILLA-2     | 12B1gPKZILLA-2 | 12B1-Scaf7  | 1023621           | 1116873         | 93252            | 92413            | 12         | 12B1g21318          | -680.4                          | 2.42293    | 1.67459   |
| PKZILLA-3     | 12B1gPKZILLA-3 | 12B1-Scaf10 | 233715            | 308247          | 74532            | 73850            | 8          |                     |                                 | 0.0327181  | 0.907688  |
| 12B1g6935.t1  | 12B1g6935      | 12B1-Scaf30 | 1090474           | 1117079         | 26605            | 24501            | 7          |                     |                                 | 0.0122754  | 0.102986  |
| 12B1g20558.t1 | 12B1g20558     | 12B1-Scaf24 | 1258375           | 1280190         | 21815            | 19167            | 25         |                     |                                 | 13.5373    | 5.5826    |
| 12B1g8858.t2  | 12B1g8858      | 12B1-Scaf14 | 381850            | 402639          | 20789            | 20367            | 6          | 12B1g8877           | 90.7                            | 0.297101   | 0.496385  |
| 12B1g8858.t1  | 12B1g8858      | 12B1-Scaf14 | 381850            | 402639          | 20789            | 20448            | 5          | 12B1g8877           | 90.7                            | 0.00288062 | 0.0022481 |
| 12B1g21318.t2 | 12B1g21318     | 12B1-Scaf7  | 323056            | 343225          | 20169            | 19878            | 2          | 12B1gPKZILLA-2      | 680.4                           | 0.306636   | 0.169165  |
| 12B1g21318.t1 | 12B1g21318     | 12B1-Scaf7  | 323056            | 343225          | 20169            | 3753             | 3          | 12B1gPKZILLA-2      | 680.4                           | 0          | 0         |
| 12B1g8877.t1  | 12B1g8877      | 12B1-Scaf14 | 493291            | 508389          | 15098            | 13578            | 7          | 12B1g8858           | -90.7                           | 1.90592    | 1.52636   |
| 12B1g521.t1   | 12B1g521       | 12B1-Scaf9  | 1906255           | 1920566         | 14311            | 11718            | 19         |                     |                                 | 6.72458    | 8.85982   |
| 12B1g5199.t1  | 12B1g5199      | 12B1-Scaf22 | 974085            | 988095          | 14010            | 13545            | 3          |                     |                                 | 0.359611   | 0.358954  |
| 12B1g8961.t1  | 12B1g8961      | 12B1-Scaf14 | 799146            | 811847          | 12701            | 11613            | 9          | 12B1g8877           | -290.8                          | 0.12426    | 0.542579  |
| 12B1g16712.t1 | 12B1g16712     | 12B1-Scaf1  | 2251945           | 2264026         | 12081            | 11883            | 2          |                     |                                 | 1.17317    | 0.828558  |
| 12B1g5573.t1  | 12B1g5573      | 12B1-Scaf21 | 668309            | 680198          | 11889            | 11493            | 6          |                     |                                 | 1.2576     | 1.35399   |
| 12B1g22763.t1 | 12B1g22763     | 12B1-Scaf16 | 1956638           | 1967275         | 10637            | 7761             | 12         |                     |                                 | 11.6529    | 5.12936   |
| 12B1g3947.t1  | 12B1g3947      | 12B1-Scaf5  | 908335            | 918651          | 10316            | 6363             | 7          | 12B1g3948           | 0.5                             | 0.751993   | 1.59325   |
| 12B1g4698.t1  | 12B1g4698      | 12B1-Scaf5  | 3795505           | 3804614         | 9109             | 8130             | 5          | 12B1g4700           | 3                               | 2.1088     | 1.27798   |
| 12B1g14437.t1 | 12B1g14437     | 12B1-Scaf3  | 1062558           | 1071078         | 8520             | 8127             | 4          |                     |                                 | 0.725751   | 0.42423   |
| 12B1g3948.t1  | 12B1g3948      | 12B1-Scaf5  | 919101            | 927118          | 8017             | 5415             | 10         | 12B1g3947           | -0.5                            | 0.37918    | 1.12212   |
| 12B1g23642.t1 | 12B1g23642     | 12B1-Scaf26 | 980919            | 987804          | 6885             | 6585             | 4          |                     |                                 | 15.6463    | 9.60298   |
| 12B1g4700.t1  | 12B1g4700      | 12B1-Scaf5  | 3807648           | 3814260         | 6612             | 4836             | 6          | 12B1g4698           | -3                              | 12.1958    | 3.27771   |
| 12B1g8154.t1  | 12B1g8154      | 12B1-Scaf13 | 326108            | 332557          | 6449             | 6225             | 3          |                     |                                 | 1.38845    | 0.879017  |
| 12B1g18060.t1 | 12B1g18060     | 12B1-Scaf33 | 408311            | 411415          | 3105             | 3105             | 1          |                     |                                 | 5.65643    | 2.4474    |

**Table S1:** Genomic characteristics of *Prymnesium parvum* 12B1 PKS genes. coord.=coordinate. tpm\_day and tpm\_night = expression values in transcripts per million (TPM) for day and night rRNA depletion RNA-seq libraries, calculated with Kallisto (doi:[10.5281/zenodo.10023425](https://doi.org/10.5281/zenodo.10023425)).



| seqid              | scaffold    | start   | end     | intron length | Upstream reading frame | Downstream reading frame | Reading frame shift from splicing? | Stop codon in intron & upstream reading frame? |
|--------------------|-------------|---------|---------|---------------|------------------------|--------------------------|------------------------------------|------------------------------------------------|
| PKZILLA-1_intron1  | 12B1-Scaf17 | 2287899 | 2287961 | 62            | 3                      | 3                        | no                                 | yes                                            |
| PKZILLA-1_intron2  | 12B1-Scaf17 | 2291865 | 2291950 | 85            | 3                      | 2                        | yes                                | no                                             |
| PKZILLA-1_intron3  | 12B1-Scaf17 | 2296229 | 2296296 | 67            | 2                      | 1                        | yes                                | no                                             |
| PKZILLA-1_intron4  | 12B1-Scaf17 | 2317507 | 2317572 | 65            | 1                      | 1                        | no                                 | yes                                            |
| PKZILLA-1_intron5  | 12B1-Scaf17 | 2327560 | 2327633 | 73            | 1                      | 3                        | yes                                | yes                                            |
| PKZILLA-1_intron6  | 12B1-Scaf17 | 2336046 | 2336111 | 65            | 3                      | 3                        | no                                 | yes                                            |
| PKZILLA-1_intron7  | 12B1-Scaf17 | 2343831 | 2343904 | 73            | 3                      | 2                        | yes                                | no                                             |
| PKZILLA-1_intron8  | 12B1-Scaf17 | 2348525 | 2348601 | 76            | 2                      | 1                        | yes                                | yes                                            |
| PKZILLA-1_intron9  | 12B1-Scaf17 | 2357062 | 2357127 | 65            | 1                      | 1                        | no                                 | yes                                            |
| PKZILLA-1_intron10 | 12B1-Scaf17 | 2364847 | 2364920 | 73            | 1                      | 3                        | yes                                | no                                             |
| PKZILLA-1_intron11 | 12B1-Scaf17 | 2369541 | 2369617 | 76            | 3                      | 2                        | yes                                | yes                                            |
| PKZILLA-1_intron12 | 12B1-Scaf17 | 2379032 | 2379132 | 100           | 2                      | 1                        | yes                                | yes                                            |
| PKZILLA-1_intron13 | 12B1-Scaf17 | 2388484 | 2388584 | 100           | 1                      | 3                        | yes                                | yes                                            |
| PKZILLA-1_intron14 | 12B1-Scaf17 | 2396328 | 2396394 | 66            | 3                      | 1                        | yes                                | no                                             |
| PKZILLA-1_intron15 | 12B1-Scaf17 | 2401024 | 2401091 | 67            | 1                      | 3                        | yes                                | yes                                            |
| PKZILLA-1_intron16 | 12B1-Scaf17 | 2415990 | 2416054 | 64            | 3                      | 2                        | yes                                | no                                             |
| PKZILLA-2_intron1  | 12B1-Scaf7  | 1024581 | 1024646 | 65            | 3                      | 3                        | no                                 | no                                             |
| PKZILLA-2_intron2  | 12B1-Scaf7  | 1029285 | 1029356 | 71            | 3                      | 3                        | no                                 | yes                                            |
| PKZILLA-2_intron3  | 12B1-Scaf7  | 1038708 | 1038808 | 100           | 3                      | 2                        | yes                                | yes                                            |
| PKZILLA-2_intron4  | 12B1-Scaf7  | 1065686 | 1065759 | 73            | 2                      | 1                        | yes                                | yes                                            |
| PKZILLA-2_intron5  | 12B1-Scaf7  | 1072585 | 1072709 | 124           | 1                      | 3                        | yes                                | yes                                            |
| PKZILLA-2_intron6  | 12B1-Scaf7  | 1092303 | 1092366 | 63            | 3                      | 1                        | yes                                | yes                                            |
| PKZILLA-2_intron7  | 12B1-Scaf7  | 1096189 | 1096253 | 64            | 1                      | 3                        | yes                                | no                                             |
| PKZILLA-2_intron8  | 12B1-Scaf7  | 1100079 | 1100143 | 64            | 3                      | 2                        | yes                                | no                                             |
| PKZILLA-2_intron9  | 12B1-Scaf7  | 1103969 | 1104033 | 64            | 2                      | 1                        | yes                                | no                                             |
| PKZILLA-2_intron10 | 12B1-Scaf7  | 1110112 | 1110183 | 71            | 1                      | 1                        | no                                 | yes                                            |
| PKZILLA-2_intron11 | 12B1-Scaf7  | 1115472 | 1115542 | 70            | 1                      | 3                        | yes                                | no                                             |
| PKZILLA-3_intron1  | 12B1-Scaf10 | 234816  | 234888  | 72            | 3                      | 1                        | yes                                | yes                                            |
| PKZILLA-3_intron2  | 12B1-Scaf10 | 234974  | 235031  | 57            | 1                      | 2                        | yes                                | yes                                            |
| PKZILLA-3_intron3  | 12B1-Scaf10 | 235152  | 235267  | 115           | 2                      | 1                        | yes                                | yes                                            |
| PKZILLA-3_intron4  | 12B1-Scaf10 | 235849  | 235976  | 127           | 1                      | 3                        | yes                                | yes                                            |
| PKZILLA-3_intron5  | 12B1-Scaf10 | 237153  | 237288  | 135           | 3                      | 1                        | yes                                | no                                             |
| PKZILLA-3_intron6  | 12B1-Scaf10 | 257254  | 257316  | 62            | 1                      | 1                        | no                                 | no                                             |
| PKZILLA-3_intron7  | 12B1-Scaf10 | 303779  | 303887  | 108           | 1                      | 2                        | yes                                | yes                                            |

**Table S2:** Intron characteristics of PKZILLA genes. See Fig. S3, S4, S5 for detailed graphical views of each intron.

| InterProScan annotated region | Short PKS nomenclature | Comments                                                                                                                                                                                                                             |
|-------------------------------|------------------------|--------------------------------------------------------------------------------------------------------------------------------------------------------------------------------------------------------------------------------------|
| SSF56801                      | ANL                    | Unintegrated into InterPro, but, covers both the "N" and "C" terminal subdomains of an ANL enzyme, unlike other matchers. Alternatively, IPR042099 matches the N-terminal (sub)domain, IPR025110 matches the C-terminal (sub)domain. |
| G3DSA:1.10.1200.10            | ACP                    | Integrated into InterPro:IPR036736                                                                                                                                                                                                   |
| G3DSA:3.40.47.10              | KS                     | Integrated into InterPro:IPR016039                                                                                                                                                                                                   |
| G3DSA:3.10.129.110            | DH                     | Integrated into InterPro:IPR042104                                                                                                                                                                                                   |
| G3DSA:3.40.50.720             | KR                     | Unintegrated into InterPro. Confirmed cross-match: Ends up nested underneath G3DSA:3.90.180.10 (ER). But, the longest available matcher for the KR.                                                                                  |
| G3DSA:3.90.180.10             | ER                     | Unintegrated into InterPro. Possible cross-match: Ends up nested underneath G3DSA:3.40.50.720 (KR)?. But, the longest available matcher for the ER. IPR020843 is a possible alternative.                                             |
| G3DSA:3.50.50.60              | FLX                    | Integrated into InterPro:IPR036188                                                                                                                                                                                                   |
| G3DSA:3.40.50.150             | MT                     | Integrated into InterPro:IPR029063                                                                                                                                                                                                   |
| G3DSA:3.90.1150.10            | AMT                    | Integrated into InterPro:IPR015422                                                                                                                                                                                                   |
| SSF53474                      | TE                     | Integrated into InterPro:IPR029058                                                                                                                                                                                                   |
| PF13469                       | ST                     | Integrated into InterPro:IPR027417. Formerly annotated with G3DSA:3.40.50.300, but PF13469/sulfotransferase is a more informative annotation.                                                                                        |
| PF00668                       | C                      | Integrated into InterPro:IPR001242. NRPS-like condensation domain. In PKZILLA-3                                                                                                                                                      |
| G3DSA:3.30.1610.10            | S59                    | Integrated into InterPro:IPR036903. This is a weak hit on PKZILLA-3. Autoproteolytic C-terminal nucleoporin thing.                                                                                                                   |

**Table S3:** Specific InterProScan annotations that were deemed to be diagnostic for and representative of particular PKS domains within the PKZILLA polypeptides, and used to select these domains for downstream analyses and figures. The table includes all non-trivially small and/or weak matches and non-intrinsically disordered region matches that were found in the PKZILLAs. Table is derived from "run2\_filter.tsv" used in Zenodo workflows for InterProScan annotations of the PKZILLAs (doi:[10.5281/zenodo.10023460](https://doi.org/10.5281/zenodo.10023460)), and non-PKZILLAs (doi:[10.5281/zenodo.10011739](https://doi.org/10.5281/zenodo.10011739)).

| seqid     | domain sequence                                                                                                                                                                                                                                                                                                                                                                                                                                                                        |
|-----------|----------------------------------------------------------------------------------------------------------------------------------------------------------------------------------------------------------------------------------------------------------------------------------------------------------------------------------------------------------------------------------------------------------------------------------------------------------------------------------------|
| PKZILLA-1 | ANL-ACP-KS-DH-KR-ACP-KS-DH-ER-KR-ACP-KS-KR-ACP-KS-KR-ACP-KS-KR-ACP-KS-KR-FLX-ACP-KS-KR-ACP-KS-DH-KR-ACP-KS-FLX-KR-FLX-ACP-KS-DH-KR-ACP-KS-FLX-KR-ACP-ACP-KS-DH-KR-ACP-KS-KR-ACP-ACP-KS-DH-ER-KR-ACP-KS-DH-KR-ACP-KS-FLX-KR-ACP-ACP-KS-DH-KR-ACP-KS-KR-ACP-ACP-KS-DH-ER-KR-ACP-KS-DH-KR-ACP-KS-KR-ACP-ACP-KS-ACP-KS-DH-KR-ACP-KS-KR-ACP-ACP-KS-ACP-KS-DH-KR-ACP-KS-KR-ACP-ACP-KS-DH-KR-ER-KR-ACP-KS-DH-KR-ACP-KS-DH-KR-MT-KR-ACP-ACP-ACP-ACP-KS-ER-KR-ACP-KS-DH-KR-ACP-KS-KR-ACP-ACP-KS |
| PKZILLA-2 | DH-ER-KR-ACP-KS-DH-KR-ACP-KS-KR-ACP-ACP-KS-ACP-KS-DH-KR-ACP-KS-KR-ACP-ACP-KS-DH-ACP-KS-DH-KR-ER-KR-ACP-KS-KR-ACP-ACP-ACP-KS-DH-ACP-KS-KR-ACP-ACP-KS-ACP-KS-DH-ER-KR-ACP-KS-KR-ACP-DH-KR-ACP-ACP-ACP-KS-DH-KR-ACP-ACP-KS-AMT-AMT-AMT-AMT-AMT-AMT-ACP-ACP-KS-DH-KR-ACP-KS-DH-KR-ACP-KS-DH-KR-ACP-KS-DH-KR-ER-KR-ER-KR-ACP-KS-DH-KR-ACP-KS-KR-ACP-ST-TE                                                                                                                                   |
| PKZILLA-3 | KS-DH-ER-KR-ACP-KS-KR-ACP-KS-KR-ACP-KS-KR-ACP-KS-DH-MT-KR-ACP-ACP-KS-KR-ER-KR-ACP-KS-DH-KR-ACP-KS-DH-ER-KR-ACP-KS-DH-ER-KR-ACP-KS-KR-FLX-ACP-KS-KR-ACP-KS-KR-ACP-KS-KR-ACP-KS-KR-ACP-KS-DH-KR-ACP-KS-DH-KR-ACP-KS-DH-KR-ACP-KS-KR-ACP-KS-DH-KR-ACP-ACP-S59-C                                                                                                                                                                                                                           |

**Table S4:** Linear sequence of polyketide synthase (PKS) domains within the PKZILLA polypeptides of *Prymnesium parvum* 12B1. Analogous rows for non-PKZILLA PKS polypeptides are not shown for brevity, but are available on Zenodo (doi:[10.5281/zenodo.10028239](https://doi.org/10.5281/zenodo.10028239)).

| seqid     | # of AA residues | M.W. (MDa) | # of modules | # of domains | # of ANLs | # of KSs | # of ACPs | # of KRAs | # of DHs | # of ERs | # of FLXs | # of MTs | # of AMTs | # of STs | # of TEs | # of S59s | # of Cs |
|-----------|------------------|------------|--------------|--------------|-----------|----------|-----------|-----------|----------|----------|-----------|----------|-----------|----------|----------|-----------|---------|
| PKZILLA-1 | 45,212           | 4.73       | 35           | 140          | 1         | 34       | 45        | 33        | 16       | 5        | 5         | 1        | 0         | 0        | 0        | 0         | 0       |
| PKZILLA-2 | 30,685           | 3.23       | 23           | 99           | 0         | 21       | 32        | 20        | 14       | 4        | 0         | 0        | 6         | 1        | 1        | 0         | 0       |
| PKZILLA-3 | 24,439           | 2.59       | 19           | 76           | 0         | 19       | 21        | 20        | 9        | 3        | 1         | 1        | 0         | 0        | 0        | 1         | 1       |

**Table S5:** Counts of polyketide synthase (PKS) residues, domains, and modules within the PKZILLA polypeptides of *Prymnesium parvum* 12B1. AA=amino acid. M.W.=Molecular weight, calculated with ProtParam (<https://web.expasy.org/protparam/>). Analogous rows for non-PKZILLA PKS sequences are not shown for brevity, but are available on Zenodo (doi:[10.5281/zenodo.10028239](https://doi.org/10.5281/zenodo.10028239)).

| cDUF ID           | PKZILLA coordinates   | Length | In module | Comments                                                                                                                                  |
|-------------------|-----------------------|--------|-----------|-------------------------------------------------------------------------------------------------------------------------------------------|
| PKZILLA-1__cDUF1  | PKZILLA-1:0-598       | 598    | N/A       | At N-terminus of PKZILLA-1. InterProScan annotates as an intrinsically disordered region.                                                 |
| PKZILLA-1__cDUF10 | PKZILLA-1:38976-39480 | 504    | M30       | Sequence and structurally similar to FLX domains. Unclear if functional or vestigial. Dubbed cveFLX6 (cve=candidate, vestigial, extended) |
| PKZILLA-1__cDUF7  | PKZILLA-1:28567-28789 | 222    | M21       | Sequence similarity to FLX domains. Short, probably vestigial.                                                                            |
| PKZILLA-1__cDUF9  | PKZILLA-1:34817-35027 | 210    | M27       | Sequence similarity to FLX domains. Short, probably vestigial.                                                                            |
| PKZILLA-1__cDUF2  | PKZILLA-1:3324-3500   | 176    | M2        | Sequence similarity to KR domains. Nearby KRc. Likely an unannotated KRn structural subdomain.                                            |
| PKZILLA-1__cDUF4  | PKZILLA-1:19100-19274 | 174    | M14       | Sequence similarity to KR domains. Nearby KRc. Likely an unannotated KRn structural subdomain.                                            |
| PKZILLA-1__cDUF6  | PKZILLA-1:26033-26207 | 174    | M19       | Sequence similarity to KR domains. Nearby KRc. Likely an unannotated KRn structural subdomain.                                            |
| PKZILLA-1__cDUF13 | PKZILLA-1:43935-44108 | 173    | M33       | Sequence similarity to FLX domains. Short, probably vestigial.                                                                            |
| PKZILLA-1__cDUF3  | PKZILLA-1:17527-17697 | 170    | M13       | Sequence similarity to KR domains. Nearby KRf. Possibly an unannotated KRn structural subdomain.                                          |
| PKZILLA-1__cDUF5  | PKZILLA-1:24460-24630 | 170    | M18       | Sequence similarity to KR domains. Nearby KRf. Possibly an unannotated KRn structural subdomain.                                          |
| PKZILLA-1__cDUF12 | PKZILLA-1:41376-41541 | 165    | M31       | Sequence similarity to KR domains. Nearby KRc. Likely an unannotated KRn structural subdomain.                                            |
| PKZILLA-1__cDUF8  | PKZILLA-1:31749-31903 | 154    | M24       | Weak sequence similarity to FLX4. Short, probably vestigial.                                                                              |
| PKZILLA-1__cDUF11 | PKZILLA-1:39951-40061 | 110    | M30       | Some sequence similarity hits in 12B1, unclear role.                                                                                      |

**Table S6:** Analysis of InterProScan unannotated regions in PKZILLA-1 as candidate domains of unknown function (cDUFs). All contiguous unannotated regions of the PKZILLAs larger than 50 amino acid residues are shown, excepting those that seemed reasonably associated with an existing annotated domain (FLX extended C-terminal regions, i.e. eFLXs; doi:[10.5281/zenodo.10120640](https://doi.org/10.5281/zenodo.10120640), fig. S6). Regions were queried against other *P. parvum* 12B1 polypeptides using blastp. Source data, analysis scripts, and raw blast results are available on Zenodo (doi:[10.5281/zenodo.10028178](https://doi.org/10.5281/zenodo.10028178)). For PKZILLA-2, see next table, and for PKZILLA-3 see Zenodo item.

| cDUF ID           | PKZILLA coordinates   | Length | In module | Comments                                                                                                                                                                                |
|-------------------|-----------------------|--------|-----------|-----------------------------------------------------------------------------------------------------------------------------------------------------------------------------------------|
| PKZILLA-2__cDUF17 | PKZILLA-2:27013-27222 | 209    | M54       | Sequence similarity to KR domains. Nearby KRc. Likely an unannotated KRn structural subdomain.                                                                                          |
| PKZILLA-2__cDUF4  | PKZILLA-2:5942-6137   | 195    | M39       | Sequence similarity to KR domains. Possibly an unannotated KRn structural subdomain.                                                                                                    |
| PKZILLA-2__cDUF9  | PKZILLA-2:15752-15938 | 186    | M47/M48   | No hits to anything. (Including KSs, and KRc)                                                                                                                                           |
| PKZILLA-2__cDUF2  | PKZILLA-2:322-499     | 177    | M34       | Sequence similarity to KR domains. Nearby KRc. Likely an unannotated KRn structural subdomain.                                                                                          |
| PKZILLA-2__cDUF8  | PKZILLA-2:13946-14120 | 174    | M46       | Sequence similarity to KR domains. Nearby KRc. Likely an unannotated KRn structural subdomain.                                                                                          |
| PKZILLA-2__cDUF7  | PKZILLA-2:11843-11970 | 127    | M44       | Sequence similarity to KS-KR-ACP-ACP modules. Possible structural role.                                                                                                                 |
| PKZILLA-2__cDUF3  | PKZILLA-2:2895-3016   | 121    | M36       | Sequence similarity to KS-KR-ACP-ACP modules. Possible structural role.                                                                                                                 |
| PKZILLA-2__cDUF12 | PKZILLA-2:19745-19845 | 100    | M50       | Associated with AMT domains. Possible structural role                                                                                                                                   |
| PKZILLA-2__cDUF14 | PKZILLA-2:20741-20841 | 100    | M50       | Associated with AMT domains. Possible structural role                                                                                                                                   |
| PKZILLA-2__cDUF10 | PKZILLA-2:18744-18839 | 95     | M50       | Multiple hits in PKZILLA-2, not within annotated domains or modules. Possible structural role.                                                                                          |
| PKZILLA-2__cDUF13 | PKZILLA-2:20243-20332 | 89     | M50       | Multiple hits in PKZILLA-2, possible structural role.                                                                                                                                   |
| PKZILLA-2__cDUF15 | PKZILLA-2:21239-21328 | 89     | M50       | Multiple hits in PKZILLA-2, possible structural role.                                                                                                                                   |
| PKZILLA-2__cDUF11 | PKZILLA-2:19248-19336 | 88     | M50       | Multiple hits in PKZILLA-2, possible structural role.                                                                                                                                   |
| PKZILLA-2__cDUF16 | PKZILLA-2:21737-21809 | 72     | M50       | Multiple hits in PKZILLA-2, possible structural role.                                                                                                                                   |
| PKZILLA-2__cDUF6  | PKZILLA-2:10441-10511 | 70     | M42/M43   | No hits.                                                                                                                                                                                |
| PKZILLA-2__cDUF1  | PKZILLA-2:0-52        | 52     | M34       | Sequence similarity to KR domains. Possibly an unannotated KRn structural subdomain. Interesting as this is the N-terminus of PKZILLA-2, might have a protein-protein interaction role. |
| PKZILLA-2__cDUF5  | PKZILLA-2:10112-10164 | 52     | M42       | No hits.                                                                                                                                                                                |

**Table S7:** Analysis of InterProScan unannotated regions in PKZILLA-2 as candidate domains of unknown function (cDUFs). All contiguous unannotated regions of the PKZILLAs larger than 50 amino acid residues are shown, excepting those that seemed reasonably associated with an existing annotated domain (FLX extended C-terminal regions, i.e. eFLXs; doi:[10.5281/zenodo.10120640](https://doi.org/10.5281/zenodo.10120640), fig. S6). Regions were queried against other *P. parvum* 12B1 polypeptides using blastp. Source data, analysis scripts, and raw blast results are available on Zenodo (doi:[10.5281/zenodo.10028178](https://doi.org/10.5281/zenodo.10028178)). For PKZILLA-1 see previous table and for PKZILLA-3, see Zenodo item.

| module | seqid     | start | end   | components                         | KS#                | ACP#                             | DH#  | ER# | KR#              | FLX#         | comments                                                |
|--------|-----------|-------|-------|------------------------------------|--------------------|----------------------------------|------|-----|------------------|--------------|---------------------------------------------------------|
| LM     | PKZILLA-1 | 600   | 1242  | ANL-ACP                            |                    | ACP1                             |      |     |                  |              | Loading module                                          |
| M1     | PKZILLA-1 | 1351  | 2591  | KS-DH-KR-ACP                       | KS1                | ACP2                             | DH1  |     | KR1              |              |                                                         |
| M2     | PKZILLA-1 | 2624  | 4147  | KS-DH-ER-KR-ACP                    | KS2                | ACP3                             | DH2  | ER1 | KR2c             |              |                                                         |
| M3     | PKZILLA-1 | 4168  | 5148  | KS-KR-ACP                          | KS3                | ACP4                             |      |     | KR3              |              |                                                         |
| M4     | PKZILLA-1 | 5168  | 6140  | KS-KR-ACP                          | KS4                | ACP5                             |      |     | KR4              |              |                                                         |
| M5     | PKZILLA-1 | 6160  | 7132  | KS-KR-ACP                          | KS5                | ACP6                             |      |     | KR5              |              |                                                         |
| M6     | PKZILLA-1 | 7152  | 8677  | KS-KR-FLX-ACP                      | KS6                | ACP7                             |      |     | KR6              | FLX1         |                                                         |
| M7     | PKZILLA-1 | 8700  | 9673  | KS-KR-ACP                          | KS7                | ACP8                             |      |     | KR7              |              |                                                         |
| M8     | PKZILLA-1 | 9693  | 10900 | KS-DH-KR-ACP                       | KS8                | ACP9                             | DH3  |     | KR8              |              |                                                         |
| M9     | PKZILLA-1 | 10918 | 12999 | KS-FLX-KR-FLX-ACP                  | KS9                | ACP10                            |      |     | KR9              | FLX2<br>FLX3 |                                                         |
| M10    | PKZILLA-1 | 13023 | 14232 | KS-DH-KR-ACP                       | KS10               | ACP11                            | DH4  |     | KR10             |              |                                                         |
| M11    | PKZILLA-1 | 14250 | 15807 | KS-FLX-KR-ACP-ACP                  | KS11               | ACP12<br>ACP13                   |      |     | KR11             | FLX4         |                                                         |
| M12    | PKZILLA-1 | 15819 | 17041 | KS-DH-KR-ACP                       | KS12               | ACP14                            | DH5  |     | KR12             |              |                                                         |
| M13    | PKZILLA-1 | 17062 | 18379 | KS-KR-ACP-ACP                      | KS13               | ACP15<br>ACP16                   |      |     | KR13             |              | Sat. bimodule (S2M)<br>M13/M14                          |
| M14    | PKZILLA-1 | 18398 | 19912 | KS-DH-ER-KR-ACP                    | KS <sup>o</sup> 14 | ACP17                            | DH6  | ER2 | KR14c0           |              | (S2M) KR inactive via<br>phylogeny                      |
| M15    | PKZILLA-1 | 19934 | 21162 | KS-DH-KR-ACP                       | KS15               | ACP18                            | DH7  |     | KR15             |              |                                                         |
| M16    | PKZILLA-1 | 21180 | 22740 | KS-FLX-KR-ACP-ACP                  | KS16               | ACP19<br>ACP20                   |      |     | KR16             | FLX5         |                                                         |
| M17    | PKZILLA-1 | 22751 | 23973 | KS-DH-KR-ACP                       | KS17               | ACP21                            | DH8  |     | KR17             |              |                                                         |
| M18    | PKZILLA-1 | 23995 | 25312 | KS-KR-ACP-ACP                      | KS18               | ACP22<br>ACP23                   |      |     | KR18             |              | Sat. bimodule (S2M)<br>M18/M19                          |
| M19    | PKZILLA-1 | 25331 | 26845 | KS-DH-ER-KR-ACP                    | KS <sup>o</sup> 19 | ACP24                            | DH9  | ER3 | KR19c0           |              | (S2M) KR inactive via<br>phylogeny                      |
| M20    | PKZILLA-1 | 26867 | 28095 | KS-DH-KR-ACP                       | KS20               | ACP25                            | DH10 |     | KR20             |              |                                                         |
| M21    | PKZILLA-1 | 28112 | 29438 | KS-KR-ACP-ACP                      | KS21               | ACP26<br>ACP27                   |      |     | KR21             |              | Pass-through<br>bimodule (PT2M)                         |
| M22    | PKZILLA-1 | 29450 | 29999 | KS-ACP                             | KS <sup>o</sup> 22 | ACP28                            |      |     |                  |              | (PT2M) M21/M22                                          |
| M23    | PKZILLA-1 | 30017 | 31221 | KS-DH-KR-ACP                       | KS23               | ACP29                            | DH11 |     | KR22             |              |                                                         |
| M24    | PKZILLA-1 | 31240 | 32555 | KS-KR-ACP-ACP                      | KS24               | ACP30<br>ACP31                   |      |     | KR23             |              | Pass-through<br>bimodule (PT2M)                         |
| M25    | PKZILLA-1 | 32576 | 33116 | KS-ACP                             | KS <sup>o</sup> 25 | ACP32                            |      |     |                  |              | (PT2M) M24/M25                                          |
| M26    | PKZILLA-1 | 33134 | 34338 | KS-DH-KR-ACP                       | KS26               | ACP33                            | DH12 |     | KR24             |              |                                                         |
| M27    | PKZILLA-1 | 34357 | 35691 | KS-KR-ACP-ACP                      | KS27               | ACP34<br>ACP35                   |      |     | KR25             |              | Sat. bimodule (S2M)<br>M27/M28                          |
| M28    | PKZILLA-1 | 35709 | 37227 | KS-DH-KR-ER-KR-ACP                 | KS <sup>o</sup> 28 | ACP36                            | DH13 | ER4 | KR26n0<br>KR27c0 |              | S2M, KR27 inactive<br>via phylogeny                     |
| M29    | PKZILLA-1 | 37252 | 38466 | KS-DH-KR-ACP                       | KS29               | ACP37                            | DH14 |     | KR28             |              |                                                         |
| M30    | PKZILLA-1 | 38482 | 40909 | KS-DH-KR-MT-KR-ACP-<br>ACP-ACP-ACP | KS30               | ACP38<br>ACP39<br>ACP40<br>ACP41 | DH15 |     | KR29n0<br>KR30c  |              | (S2M), PKZILLA-1<br>cDUF10, cveFLX6<br>contained within |
| M31    | PKZILLA-1 | 40933 | 42203 | KS-ER-KR-ACP                       | KS <sup>o</sup> 31 | ACP42                            |      | ER5 | KR31c0           |              | (S2M) M30/M31                                           |
| M32    | PKZILLA-1 | 42214 | 43440 | KS-DH-KR-ACP                       | KS32               | ACP43                            | DH16 |     | KR32             |              |                                                         |
| M33    | PKZILLA-1 | 43458 | 44768 | KS-KR-ACP-ACP                      | KS33               | ACP44<br>ACP45                   |      |     | KR33             |              | Split sat. bimodule<br>(S2M) M33/M34                    |
| M34    | PKZILLA-1 | 44790 | 45210 | KS-                                | KS <sup>o</sup> 34 |                                  |      |     |                  |              | S2M, Split module<br>(split w/ PKZILLA-2)               |

**Table S8:** Organization of PKZILLA-1 domains into modules and the assignment of domain catalytic activity or inactivity based on active site analysis. Number, contents, and extents of modules have been modified from original bioinformatic predictions to account for non-standard or split module structures. Source data & code for bioinformatic predictions of modules are available at Zenodo (doi:[10.5281/zenodo.10028239](https://doi.org/10.5281/zenodo.10028239)). Analogous module structures for PKZILLA-3 and non-PKZILLA polypeptides are not shown for brevity, but are available at Zenodo (doi:[10.5281/zenodo.10028239](https://doi.org/10.5281/zenodo.10028239)). For PKZILLA-2, see next table. KR domains are annotated as KR/KRf, KRn, KRc depending on their respective classification as a full length non-split KR, a split KR N-terminal subdomain, or a split KR C-terminal subdomain, and “0” is appended to the domain name if the active site residues suggest the domain is catalytically inactive, or in case of KSs, if it is a predicted catalytically active but non-elongating domain. For further details on catalytic activity determination via active site analysis, see “Analysis of active site residues within PKZILLA PKS domains” in the Materials and Methods and the associated Zenodo item (doi:[10.5281/zenodo.10028517](https://doi.org/10.5281/zenodo.10028517)).

| module cont. | module restart | seqid     | start | end   | components                 | KS#                | ACP#                    | DH#  | ER# | KR#            | comments                                                      |
|--------------|----------------|-----------|-------|-------|----------------------------|--------------------|-------------------------|------|-----|----------------|---------------------------------------------------------------|
| M34          | (M1)           | PKZILLA-2 | 52    | 1139  | -DH-ER-KR-ACP              |                    | ACP1                    | DH1  | ER1 | KR1c0          | Split module (split w/ PKZILLA-1). KR inactive via phylogeny. |
| M35          | (M2)           | PKZILLA-2 | 1186  | 2382  | KS-DH-KR-ACP               | KS1                | ACP2                    | DH2  |     | KR2            |                                                               |
| M36          | (M3)           | PKZILLA-2 | 2400  | 3707  | KS-KR-ACP-ACP              | KS2                | ACP3<br>ACP4            |      |     | KR3            | Pass-through bimodule (PT2M) M36/M37                          |
| M37          | (M4)           | PKZILLA-2 | 3735  | 4275  | KS-ACP                     | KS <sup>0</sup> 3  | ACP5                    |      |     |                | (PT2M)                                                        |
| M38          | (M5)           | PKZILLA-2 | 4294  | 5497  | KS-DH-KR-ACP               | KS4                | ACP6                    | DH3  |     | KR4            |                                                               |
| M39          | (M6)           | PKZILLA-2 | 5519  | 6822  | KS-KR-ACP-ACP              | KS5                | ACP7<br>ACP8            |      |     | KR5            | Dehydrating bimodule (DH2M) M39/M40                           |
| M40          | (M7)           | PKZILLA-2 | 6850  | 7654  | KS-DH-ACP                  | KS <sup>0</sup> 6  | ACP9                    | DH4  |     |                | (DH2M)                                                        |
| M41          | (M8)           | PKZILLA-2 | 7664  | 9233  | KS-DH-KR-ER-KR-ACP         | KS7                | ACP10                   | DH5  | ER2 | KR6n0<br>KR7c  | ER2 is diverged from other ERs , ER*                          |
| M42          | (M9)           | PKZILLA-2 | 9258  | 10437 | KS-KR-ACP-ACP-ACP          | KS8                | ACP11<br>ACP12<br>ACP13 |      |     | KR8            | Dehydrating bimodule (DH2M) M42/M43                           |
| M43          | (M10)          | PKZILLA-2 | 10519 | 11331 | KS-DH-ACP                  | KS <sup>0</sup> 9  | ACP14                   | DH6  |     |                | (DH2M)                                                        |
| M44          | (M11)          | PKZILLA-2 | 11350 | 12655 | KS-KR-ACP-ACP              | KS10               | ACP15<br>ACP16          |      |     | KR9            | Saturating trimodule (S3M) M44/M45/M46                        |
| M45          | (M12)          | PKZILLA-2 | 12678 | 13225 | KS-ACP                     | KS <sup>0</sup> 11 | ACP17                   |      |     |                | (S3M)                                                         |
| M46          | (M13)          | PKZILLA-2 | 13243 | 14757 | KS-DH-ER-KR-ACP            | KS <sup>0</sup> 12 | ACP18                   | DH7  | ER3 | KR10c0         | (S3M), KR inactive via phylogeny                              |
| M47          | (M14)          | PKZILLA-2 | 14779 | 15743 | KS-KR-ACP                  | KS13               | ACP19                   |      |     | KR11*          | KR*. Initiates polyether.                                     |
| M48*         | (M15*)         | PKZILLA-2 | 15938 | 16942 | DH-KR-ACP-ACP-ACP          |                    | ACP20<br>ACP21<br>ACP22 | DH8  |     | KR12           | Missing KS. Unannotated DH- upstream-gap is PKZILLA-2_cDUF9   |
| M49          | (M16)          | PKZILLA-2 | 16958 | 18303 | KS-DH-KR-ACP-ACP           | KS14               | ACP23<br>ACP24          | DH9  |     | KR13           | KS,DH diverged vs PKZILLA others                              |
| M50          | (M17)          | PKZILLA-2 | 18323 | 22019 | KS-AMT-AMT-AMT-AMT-ACP-ACP | KS15               | ACP25<br>ACP26          |      |     |                | AMT1, AMT2, ..., AMT6                                         |
| M51          | (M18)          | PKZILLA-2 | 22043 | 23279 | KS-DH-KR-ACP               | KS16               | ACP27                   | DH10 |     | KR14           |                                                               |
| M52          | (M19)          | PKZILLA-2 | 23307 | 24554 | KS-DH-KR-ACP               | KS17               | ACP28                   | DH11 |     | KR15           |                                                               |
| M53          | (M20)          | PKZILLA-2 | 24582 | 25829 | KS-DH-KR-ACP               | KS18               | ACP29                   | DH12 |     | KR16           |                                                               |
| M54          | (M21)          | PKZILLA-2 | 25857 | 27862 | KS-DH-KR-ER-KR-ACP         | KS19               | ACP30                   | DH13 | ER4 | KR17<br>KR18c0 | KR17 is full length (f). KR18 inactive via phylogeny          |
| M55          | (M22)          | PKZILLA-2 | 27918 | 29114 | KS-DH-KR-ACP               | KS20               | ACP31                   | DH14 |     | KR19           |                                                               |
| M56          | (M23)          | PKZILLA-2 | 29132 | 30667 | KS-KR-ACP-ST-TE            | KS21               | ACP32                   |      |     | KR20*          | ST-TE=Curacin/ CurM-like termination didomain. KR*            |

**Table S9:** Organization of PKZILLA-2 domains into modules and the assignment of domain catalytic activity or inactivity based on active site analysis. Number, contents, and extents of modules have been modified from original bioinformatic predictions to account for non-standard or split module structures. Source data & code for bioinformatic predictions of modules are available at Zenodo (doi:[10.5281/zenodo.10028239](https://doi.org/10.5281/zenodo.10028239)). Analogous module structures for PKZILLA-3 and non-PKZILLA polypeptides are not shown for brevity, but are available at Zenodo (doi:[10.5281/zenodo.10028239](https://doi.org/10.5281/zenodo.10028239)). For PKZILLA-1, see previous table. KR domains are annotated as KR/KRf, KRn, KRc depending on their respective classification as a full length non-split KR, a split KR N-terminal subdomain, or a split KR C-terminal subdomain, and a 0 is appended to the domain name if the active site residues suggest the domain is catalytically inactive, or in case of KSs, if it is a predicted catalytically active but non-elongating domain. For further details on catalytic activity determination via active site analysis, see “Analysis of active site residues within PKZILLA PKS domains” in the Materials and Methods and the associated Zenodo item (doi:[10.5281/zenodo.10028517](https://doi.org/10.5281/zenodo.10028517))



| Uniprot taxon mnemonic | informative taxonomic parent | explanation                                                                                   |
|------------------------|------------------------------|-----------------------------------------------------------------------------------------------|
| PKZILLA                | haptophyte algae             | Domain arising from a PKZILLA gene from <i>Prymnesium parvum</i> strain 12B1 (haptophyte)     |
| 9ACTN                  | bacteria                     | Descended taxon of Actinomycetota                                                             |
| 9CYAN                  | bacteria                     | Descended taxon of Cyanobacteriota                                                            |
| 9DINO                  | dinoflagellate algae         | Descended taxon of Dinophyceae (dinoflagellates)                                              |
| ASPFN                  | fungi                        | <i>Aspergillus flavus</i>                                                                     |
| ASPFU                  | fungi                        | <i>Aspergillus fumigatus</i>                                                                  |
| ASPPU                  | fungi                        | <i>Aspergillus parasiticus</i>                                                                |
| ASPTE                  | fungi                        | <i>Aspergillus terreus</i>                                                                    |
| ASPTN                  | fungi                        | <i>Aspergillus terreus</i> (strain NIH 2624 / FGSC A1156)                                     |
| CHLRE                  | green algae                  | <i>Chlamydomonas reinhardtii</i>                                                              |
| DOTSN                  | fungi                        | <i>Dothiostroma septosporum</i> (strain NZE10 / CBS 128990) aka Red band needle blight fungus |
| EMENI                  | fungi                        | <i>Emericella nidulans</i>                                                                    |
| EMIHU                  | haptophyte algae             | <i>Emiliana huxleyi</i> (haptophyte)                                                          |
| HUMAN                  | animals                      | <i>Homo sapiens</i>                                                                           |
| MONPI                  | fungi                        | <i>Monascus pilosus</i> aka Red mold                                                          |
| MYCBO                  | bacteria                     | <i>Mycobacterium bovis</i> (strain ATCC BAA-935 / AF2122/97)                                  |
| MYCMM                  | bacteria                     | <i>Mycobacterium marinum</i> (strain ATCC BAA-535 / M)                                        |
| PENAE                  | fungi                        | <i>Penicillium aethiopicum</i> (fungi)                                                        |
| SACER                  | bacteria                     | <i>Saccharopolyspora erythraea</i> - erythromycin producer                                    |
| STRAT                  | bacteria                     | <i>Streptomyces antibioticus</i> - oleandomycin producer                                      |
| STRVZ                  | bacteria                     | <i>Streptomyces venezuelae</i> - pikromycin producer                                          |

**Table S10:** Mapping of uniprot taxonomy mnemonics to human readable descriptions. Key for taxonomic interpretation of fig. S16, S17, S18, S19.

| seqid             | module  | MSA sequence context around diagnostic site (+/- 10 residues) | residue at diagnostic site | predicted stereochemical outcome | If DH present, proposed ene outcome | comment                                                                                                            |
|-------------------|---------|---------------------------------------------------------------|----------------------------|----------------------------------|-------------------------------------|--------------------------------------------------------------------------------------------------------------------|
| A9GJ40            | N/A     | VIHSAIVLR-DRSLREMDEP-                                         | D                          | (R)                              |                                     | seqid is Uniprot ID. Corresponds to (R) hydroxyl forming KR "1. Etn_KR12_D-OH" from Supplementary Figure 4 of (32) |
| A1KQR8            | N/A     | AIFSGMVFD <del>F</del> ENSIQQTSEA-                            | E                          | (S)                              |                                     | seqid is Uniprot ID. Corresponds to (S) hydroxyl forming KR "12. rhi_KR3_L-OH" from Supplementary Figure 4 of (32) |
| PKZILLA-1__KR1    | M1      | FWHTAGVLF-DALVKKQNAV-                                         | D                          | (R)                              | (E)-                                |                                                                                                                    |
| PKZILLA-1__KR2c   | M2      | VWHAAGVLA-DSMLPKQTAL-                                         | D                          | (R)                              |                                     |                                                                                                                    |
| PKZILLA-1__KR3    | M3      | VLHAAGYAV-DTSLIDLVAR-                                         | D                          | (R)                              |                                     |                                                                                                                    |
| PKZILLA-1__KR4    | M4      | MLHAAGASD-KGLLLDIVAR-                                         | K                          | (S)                              |                                     |                                                                                                                    |
| PKZILLA-1__KR5    | M5      | MLHAAGVGD-KGLLLDIVAR-                                         | K                          | (S)                              |                                     |                                                                                                                    |
| PKZILLA-1__KR6    | M6      | IFHMTEVLI-DKLIFLMPAR-                                         | D                          | (R)                              |                                     |                                                                                                                    |
| PKZILLA-1__KR7    | M7      | VLHAAGVGD-KGLLLDIVAR-                                         | K                          | (S)                              |                                     |                                                                                                                    |
| PKZILLA-1__KR8    | M8      | VWHAAGALA-DSLLPSLRAE-                                         | D                          | (R)                              | (E)-                                |                                                                                                                    |
| PKZILLA-1__KR9    | M9      | VFHMTEILQ-DKLIFGMTSK-                                         | D                          | (R)                              |                                     |                                                                                                                    |
| PKZILLA-1__KR10   | M10     | LWHAAGVLV-DGVLSKQTAR-                                         | D                          | (R)                              | (E)-                                |                                                                                                                    |
| PKZILLA-1__KR11   | M11     | VLHAAGTGD-KGLLLELVSL-                                         | K                          | (S)                              |                                     |                                                                                                                    |
| PKZILLA-1__KR12   | M12     | VWHAAGVLA-DAILHKQTAR-                                         | D                          | (R)                              | (E)-                                |                                                                                                                    |
| PKZILLA-1__KR13   | M13     | ILHAAGVLR-DALLRNTRAA-                                         | D                          | (R)                              |                                     |                                                                                                                    |
| PKZILLA-1__KR14c0 | M14     | VWHAAGM----SESMQQHTH-                                         | -                          | N/A                              |                                     |                                                                                                                    |
| PKZILLA-1__KR15   | M15     | VWHAAGVLA-DGMVVKQDSR-                                         | D                          | (R)                              | (E)-                                |                                                                                                                    |
| PKZILLA-1__KR16   | M16     | VLHAAGTGD-KGLLLELVSL-                                         | K                          | (S)                              |                                     |                                                                                                                    |
| PKZILLA-1__KR17   | M17     | VWHAAGVLA-DAILHKQTAR-                                         | D                          | (R)                              | (E)-                                |                                                                                                                    |
| PKZILLA-1__KR18   | M18     | ILHAAGVLR-DALLRNTRAA-                                         | D                          | (R)                              |                                     |                                                                                                                    |
| PKZILLA-1__KR19c0 | M19     | VWHAAGM----SESMQQHTH-                                         | -                          | N/A                              |                                     |                                                                                                                    |
| PKZILLA-1__KR20   | M20     | VWHAAGVLA-DGMVVKQDSR-                                         | D                          | (R)                              | (E)-                                |                                                                                                                    |
| PKZILLA-1__KR21   | M21     | ILHAAGVLR-DALLRNTRAA-                                         | D                          | (R)                              |                                     |                                                                                                                    |
| PKZILLA-1__KR22   | M23     | VWHAAGVLA-DGMLAKQSAR-                                         | D                          | (R)                              | (E)-                                |                                                                                                                    |
| PKZILLA-1__KR23   | M24     | ILHAAGVLR-DALLRNTRAA-                                         | D                          | (R)                              |                                     |                                                                                                                    |
| PKZILLA-1__KR24   | M26     | VWHAAGVLA-DGMLAKQSAR-                                         | D                          | (R)                              | (E)-                                |                                                                                                                    |
| PKZILLA-1__KR25   | M27     | ILHAAGVLR-DALLRNTRAA-                                         | D                          | (R)                              |                                     |                                                                                                                    |
| PKZILLA-1__KR26n0 | M28     | -----                                                         | -                          | N/A                              |                                     |                                                                                                                    |
| PKZILLA-1__KR27c0 | M28     | VWHTSSSFY-DAEFLQQNAL-                                         | D                          | (R)                              |                                     | Note: predicted to be inactive.                                                                                    |
| PKZILLA-1__KR28   | M29     | VWHAAGVLA-DALLPNQTAM-                                         | D                          | (R)                              | (E)-                                |                                                                                                                    |
| PKZILLA-1__KR29n0 | M30     | -----                                                         | -                          | N/A                              |                                     |                                                                                                                    |
| PKZILLA-1__KR30c  | M30     | IFHAAHRLA-DAVLANQKAT-                                         | D                          | (R)                              |                                     |                                                                                                                    |
| PKZILLA-1__KR31c0 | M31     | VWHTASSLS-EASIPTTTSAV                                         | E                          | (S)                              |                                     | Note: predicted to be inactive.                                                                                    |
| PKZILLA-1__KR32   | M32     | LWHAAGVVS-DGVLAQSAQ-                                          | D                          | (R)                              | (E)-                                |                                                                                                                    |
| PKZILLA-1__KR33   | M33     | VLHAAGVLW-DALLRNTRAP-                                         | D                          | (R)                              |                                     |                                                                                                                    |
| PKZILLA-2__KR1c0  | M34     | VWHTMGVMS-SAELNQDQDAL-                                        | S                          | (S)                              |                                     | Note: predicted to be inactive.                                                                                    |
| PKZILLA-2__KR2    | M35     | LWHAAGLLS-DGLIPKQTAR-                                         | D                          | (R)                              | (E)-                                |                                                                                                                    |
| PKZILLA-2__KR3    | M36     | VLHAAGVLR-DSLRLNTRAQ-                                         | D                          | (R)                              |                                     |                                                                                                                    |
| PKZILLA-2__KR4    | M38     | VWHAAGVLA-DGMLAKQSAR-                                         | D                          | (R)                              | (E)-                                |                                                                                                                    |
| PKZILLA-2__KR5    | M39/M40 | VLHAAGVLR-DSLRLNTRAQ-                                         | D                          | (R)                              | (E)-                                |                                                                                                                    |
| PKZILLA-2__KR6n0  | M41     | -----                                                         | -                          | N/A                              |                                     |                                                                                                                    |

|                  |         |                                    |   |     |      |                                                      |
|------------------|---------|------------------------------------|---|-----|------|------------------------------------------------------|
| PKZILLA-2_KR7c   | M41     | VWHAAGVLA- <del>D</del> SLLPNQRAQ- | D | (R) |      |                                                      |
| PKZILLA-2_KR8    | M42/M43 | FVHASGVLL- <del>D</del> SILCRNISM- | D | (R) | (E)- |                                                      |
| PKZILLA-2_KR9    | M44     | VLHAAGVLR- <del>D</del> SLLRNTRAQ- | D | (R) |      |                                                      |
| PKZILLA-2_KR10c0 | M46     | VWHAAGM----SEFMQQHTH-              | - | N/A |      |                                                      |
| PKZILLA-2_KR11*  | M47     | VLHMPRAVE- <del>E</del> RVLVYLGAR- | E | (S) |      | Note: possibly novel catalysis or inactive. Is a KR* |
| PKZILLA-2_KR12   | M48*    | IWHAAGVIV- <del>D</del> ALLPKQTSA- | D | (R) | (E)- |                                                      |
| PKZILLA-2_KR13   | M49     | VWHAAGVLA- <del>D</del> AVLAKQDEH- | D | (R) | (E)- |                                                      |
| PKZILLA-2_KR14   | M51     | VWHAAGVLA- <del>D</del> AVLPNQTA-  | D | (R) | (E)- |                                                      |
| PKZILLA-2_KR15   | M52     | VWHAAGVLA- <del>D</del> AVLPKQTAA- | D | (R) | (E)- |                                                      |
| PKZILLA-2_KR16   | M53     | AWHSAGVLA- <del>D</del> AVLPKQTAA- | D | (R) | (E)- |                                                      |
| PKZILLA-2_KR17   | M54     | AWHSAGVLA- <del>D</del> AVLPKQTAA- | D | (R) |      |                                                      |
| PKZILLA-2_KR18c0 | M54     | VWHTMGVMS- <del>N</del> AELNQDAL-  | N | (S) |      | Note: predicted to be inactive.                      |
| PKZILLA-2_KR19   | M55     | LWHAAGLLS- <del>D</del> GLIPKQTAR- | D | (R) | (E)- |                                                      |
| PKZILLA-2_KR20*  | M56     | VLQMWSVQR- <del>D</del> VALKGLTCR- | D | (R) | (E)- | Note: possibly novel catalysis or inactive. Is a KR* |

**Table S11:** Bioinformatic assignment of stereochemical outcome for PKZILLA-1/-2 ketoreductases (KRs). An (R) or (S) stereochemical outcome of ketoreduction at the hydroxyl-bound carbon (fig. S20) was predicted based on the reported heuristic of stereochemical outcome for *trans*-AT KRs (Supplementary Figure 4 of (32)), wherein an aspartate (D) at the designated site is predictive of (R) stereochemistry, while any other residue is predictive of (S) stereochemistry. If a DH domain was present in the module, an (E)- or (Z)- outcome for alkene formation was predicted based on the published heuristic (94) that an (R) hydroxyl is predictive of (E)- while an (S) hydroxyl is predictive of (Z)-. Source data, analysis code, and results are available on Zenodo (doi:[10.5281/zenodo.10569208](https://doi.org/10.5281/zenodo.10569208)).

| Carbon with stereocenter | Type                         | Empirically reported stereochemistry* | Responsible module | Mapped stereochemically responsible domain(s) | Bioinformatically predicted stereochemical outcome** | Predicted stereochemistry matches empirical? |
|--------------------------|------------------------------|---------------------------------------|--------------------|-----------------------------------------------|------------------------------------------------------|----------------------------------------------|
| C85                      | " $\alpha$ "-Cl              | (S)                                   | <i>n.d.</i> [M2]   | N/A                                           | <i>n.d.</i>                                          |                                              |
| C84                      | $\beta$ -OH                  | <i>n.d.</i>                           | <b>M3</b>          | PKZILLA-1__KR3                                | (R)                                                  |                                              |
| C83                      | $\alpha$ -OH                 | <i>n.d.</i>                           | <i>n.d.</i> [M3]   | N/A                                           | <i>n.d.</i>                                          |                                              |
| C82                      | $\beta$ -OH                  | <i>n.d.</i>                           | <b>M4</b>          | PKZILLA-1__KR4                                | (S)                                                  |                                              |
| C81                      | $\alpha$ -OH                 | <i>n.d.</i>                           | <i>n.d.</i> [M5]   | N/A                                           | <i>n.d.</i>                                          |                                              |
| C80                      | $\beta$ -OH                  | <i>n.d.</i>                           | <b>M5</b>          | PKZILLA-1__KR5                                | (S)                                                  |                                              |
| C78                      | $\beta$ -OH                  | <i>n.d.</i>                           | <b>M6</b>          | PKZILLA-1__KR6                                | (R)                                                  |                                              |
| C77                      | $\alpha$ -OH                 | <i>n.d.</i>                           | <b>M6</b>          | PKZILLA-1__KR6<br>/FLX1                       | <i>n.d.</i>                                          |                                              |
| C76                      | $\beta$ -OH                  | <i>n.d.</i>                           | <b>M7</b>          | PKZILLA-1__KR7                                | (S)                                                  |                                              |
| C72                      | $\beta$ -OH                  | (R)                                   | <b>M9</b>          | PKZILLA-1__KR9                                | (R)                                                  | Yes                                          |
| C71                      | $\alpha$ -OH                 | (S)                                   | <b>M9</b>          | PKZILLA-1__KR9<br>/FLX2/3                     | <i>n.d.</i>                                          |                                              |
| C68                      | $\beta$ -OH                  | (S)                                   | <b>M11</b>         | PKZILLA-1__KR11                               | (S)                                                  | Yes                                          |
| C67                      | $\alpha$ -OH                 | (S)                                   | <b>M11</b>         | PKZILLA-1__KR11/FLX4                          | <i>n.d.</i>                                          |                                              |
| C60                      | $\beta$ -OH                  | (S)                                   | <b>M16</b>         | PKZILLA-1__KR16                               | (S)                                                  | Yes                                          |
| C56                      | " $\beta$ "-Cl               | (R)                                   | <i>n.d.</i> [M19]  | N/A                                           | <i>n.d.</i>                                          |                                              |
| C52                      | $\beta$ -OH                  | (R)                                   | <b>M21/M22</b>     | PKZILLA-1__KR21                               | (R)                                                  | Yes                                          |
| C48                      | $\beta$ -OH                  | (R)                                   | <b>M24/M25</b>     | PKZILLA-1__KR23                               | (R)                                                  | Yes                                          |
| C39                      | " $\alpha$ "-CH <sub>3</sub> | (R)                                   | <b>M30</b>         | PKZILLA-2__MT1/ER5                            | <i>n.d.</i>                                          |                                              |
| C32                      | $\beta$ -OH                  | (S)                                   | <b>M36/M37</b>     | PKZILLA-2__KR3                                | (R)                                                  | No                                           |
| C20                      | $\beta$ -OH                  | (S)                                   | <b>M47</b>         | PKZILLA-2__KR11*                              | (S)                                                  | Yes                                          |
| C14                      | " $\beta$ "-amine            | (R)                                   | <b>M50</b>         | PKZILLA-2__AMT1...                            | <i>n.d.</i>                                          |                                              |

**Table S12:** Comparison of stereochemical assignments from structural elucidations and retrobiosynthetic inferences with bioinformatically predicted stereochemical assignments. \*=Stereochemistry determined from retrobiosynthetic inferences of reported prymnesin stereochemistry (Fig. 3) onto the proposed pre-prymnesin biosynthetic precursor (PPBP), with (R) or (S) stereochemistry calculated on a standardized polyketide chain elongation thioester intermediate (fig. S20). Due to an inversion of Cahn–Ingold–Prelog priority when  $\gamma,\delta$  bond is an alkene vs saturated, or if the  $\gamma$  carbon has a hydroxyl,  $\gamma,\delta$  carbons were drawn as always saturated and without hydroxyls for the purposes of stereochemical assignment. \*\*=See previous Table. *n.d.* = not determined . N/A = not applicable.

| Double bonded carbons in PA | Empirically reported (E)-ene or (Z)-ene isomer | Responsible module | Mapped responsible domain(s) for isomeric outcome on PPBP | Bioinformatically predicted isomeric outcome** | Predicted isomer matches empirical? |
|-----------------------------|------------------------------------------------|--------------------|-----------------------------------------------------------|------------------------------------------------|-------------------------------------|
| C21-C22                     | (E)-                                           | <b>M49</b>         | <i>n.d.</i>                                               | <i>n.d.</i>                                    |                                     |
| C23-C24                     | (E)-                                           | <b>M49</b>         | <i>n.d.</i>                                               | <i>n.d.</i>                                    |                                     |
| C12-C11                     | (E)-                                           | <b>M51</b>         | PKZILLA-2__KR14/DH10                                      | (E)-                                           | Yes                                 |
| C10-C9                      | (E)-                                           | <b>M52</b>         | PKZILLA-2__KR15/DH11                                      | (E)-                                           | Yes                                 |
| C8-C7                       | (alkyne)                                       | <b>M53</b>         | PKZILLA-2__KR16/DH12                                      | (E)-                                           | <i>n.d.</i>                         |

**Table S13:** Comparison of (E)-ene vs (Z)-ene isomer observations on prymnesin from structural elucidations with bioinformatically predicted isomeric outcomes on PPBP. \*\*=See Table S11. *n.d.* = not determined, due to lack of bioinformatic heuristic for prediction of isomeric outcome for vinylogous dehydration. N/A = not applicable. PA=prymnesin aglycone (see Fig. 3), PPBP=pre-prymnesin biosynthetic precursor (see Fig. 3).

|    | Title of Dataset or Summary for Github repository                                                                                                                                                                        | Category        | DOI or URL                                                                                                                      |
|----|--------------------------------------------------------------------------------------------------------------------------------------------------------------------------------------------------------------------------|-----------------|---------------------------------------------------------------------------------------------------------------------------------|
| 1  | Version v1.1 of the reference genome for <i>Prymnesium parvum</i> 12B1 (12B1_scaffolds_v1.1.fasta)                                                                                                                       | Genomics        | <a href="https://doi.org/10.5281/zenodo.10023322">https://doi.org/10.5281/zenodo.10023322</a>                                   |
| 2  | Version 1.1 of the <i>Prymnesium parvum</i> 12B1 gene annotation (12B1_v1.1.gff3)                                                                                                                                        | Genomics        | <a href="https://doi.org/10.5281/zenodo.10023330">https://doi.org/10.5281/zenodo.10023330</a>                                   |
| 3  | Hotspots of PKS coding evidence within the <i>Prymnesium parvum</i> 12B1 v1.1 genome assembly                                                                                                                            | Genomics        | <a href="https://doi.org/10.5281/zenodo.10309063">https://doi.org/10.5281/zenodo.10309063</a>                                   |
| 4  | Kallisto v0.50.0 expression quantification of day and night phase rRNA depletion RNA-Seq data from <i>P. parvum</i> strain 12B1                                                                                          | Transcriptomics | <a href="https://doi.org/10.5281/zenodo.10023426">https://doi.org/10.5281/zenodo.10023426</a>                                   |
| 5  | Detailed mass spectrometry instrument method text description, used to produce proteomic data files for PKZILLA manuscript                                                                                               | Proteomics      | <a href="https://doi.org/10.5281/zenodo.10023360">https://doi.org/10.5281/zenodo.10023360</a>                                   |
| 6  | SearchGUI proteomic search analysis for PKZILLAs in <i>P. parvum</i> 12B1                                                                                                                                                | Proteomics      | <a href="https://doi.org/10.5281/zenodo.10023441">https://doi.org/10.5281/zenodo.10023441</a>                                   |
| 7  | Scripts and analysis files for categorization of PKZILLA matching proteomic peptides into protein-unique, protein-multimatch & exon-unique, exon-multimatch categories.                                                  | Proteomics      | <a href="https://doi.org/10.5281/zenodo.10028959">https://doi.org/10.5281/zenodo.10028959</a>                                   |
| 8  | A Nextflow pipeline that wraps InterProScan, including making it parallelized & doing some plotting                                                                                                                      | Supporting code | <a href="https://github.com/photocyte/interproscan_parallel">https://github.com/photocyte/interproscan_parallel</a>             |
| 9  | InterProScan domain annotation on non-PKZILLA polypeptides                                                                                                                                                               | PKS analysis    | <a href="https://doi.org/10.5281/zenodo.10011739">https://doi.org/10.5281/zenodo.10011739</a>                                   |
| 10 | InterProScan domain annotation of PKZILLA polypeptides                                                                                                                                                                   | PKS analysis    | <a href="https://doi.org/10.5281/zenodo.10023460">https://doi.org/10.5281/zenodo.10023460</a>                                   |
| 11 | PKZILLA candidate domains of unknown function (cDUFs) analysis                                                                                                                                                           | PKS analysis    | <a href="https://doi.org/10.5281/zenodo.10028178">https://doi.org/10.5281/zenodo.10028178</a>                                   |
| 12 | <i>Prymnesium parvum</i> 12B1 polyketide synthase (PKS) domain and module analysis                                                                                                                                       | PKS analysis    | <a href="https://doi.org/10.5281/zenodo.10028239">https://doi.org/10.5281/zenodo.10028239</a>                                   |
| 13 | Tabular analysis of polyketide synthase domain active site residues in the PKZILLAs                                                                                                                                      | PKS analysis    | <a href="https://doi.org/10.5281/zenodo.10028517">https://doi.org/10.5281/zenodo.10028517</a>                                   |
| 14 | Bioinformatic assignment of PKZILLA ketoreductase (KR) stereochemical outcome based on application of a literature trans-AT KR diagnostic residue heuristic                                                              | PKS analysis    | <a href="https://doi.org/10.5281/zenodo.10569208">https://doi.org/10.5281/zenodo.10569208</a>                                   |
| 15 | Domain phylogenetics for the PKZILLAs                                                                                                                                                                                    | PKS analysis    | <a href="https://doi.org/10.5281/zenodo.10152638">https://doi.org/10.5281/zenodo.10152638</a>                                   |
| 16 | A wrapper around some simple Python scripts, to query the InterPro API with respect to fetching domains from arbitrary taxonomic groups, ranging from all life to specific strains                                       | Supporting code | <a href="https://github.com/photocyte/InterPro_API_domain_toolkit">https://github.com/photocyte/InterPro_API_domain_toolkit</a> |
| 17 | PKZILLA domain phylogenies with outgroup representatives from Uniprot                                                                                                                                                    | PKS analysis    | <a href="https://doi.org/10.5281/zenodo.10247217">https://doi.org/10.5281/zenodo.10247217</a>                                   |
| 18 | Non-length-normalized graphical plots of the PKZILLA domains, modules, cDUFs, and exon extents                                                                                                                           | PKS analysis    | <a href="https://doi.org/10.5281/zenodo.10093617">https://doi.org/10.5281/zenodo.10093617</a>                                   |
| 19 | Scripts, data, and analyses for extending flavoprotein (FLX) domains C-terminally to form extended FLX domains (eFLX) & performing structural predictions & alignments using AlphaFold2, RoseTTAFold, FoldSeek, and DALI | PKS analysis    | <a href="https://doi.org/10.5281/zenodo.10120640">https://doi.org/10.5281/zenodo.10120640</a>                                   |

**Table S14:** Extended analyses, datasets, and code available on Zenodo or Github.

## References:

1. G. M. Hallegraeff, D. M. Anderson, K. Davidson, F. Gianella, P. Hansen, *Fish-Killing Marine Algal Blooms: Causative Organisms, Ichthyotoxic Mechanisms, Impacts and Mitigation*. (UNESCO, Paris, France, 2023; <https://dx.doi.org/10.25607/OBP-1964>)*IOC Manuals and Guides*.
2. J. Sobieraj, D. Metelski, Insights into Toxic *Prymnesium parvum* Blooms as a Cause of the Ecological Disaster on the Odra River. *Toxins* **15**, 403 (2023).
3. D. M. Anderson, E. Fensin, C. J. Gobler, A. E. Hoeglund, K. A. Hubbard, D. M. Kulis, J. H. Landsberg, K. A. Lefebvre, P. Provoost, M. L. Richlen, J. L. Smith, A. R. Solow, V. L. Trainer, Marine harmful algal blooms (HABs) in the United States: History, current status and future trends. *Harmful Algae* **102**, 101975 (2021).
4. K. C. Nicolaou, M. O. Frederick, R. J. Aversa, The Continuing Saga of the Marine Polyether Biotoxins. *Angew. Chem. Int. Ed.* **47**, 7182–7225 (2008).
5. T. Igarashi, M. Satake, T. Yasumoto, Structures and Partial Stereochemical Assignments for Prymnesin-1 and Prymnesin-2: Potent Hemolytic and Ichthyotoxic Glycosides Isolated from the Red Tide Alga *Prymnesium parvum*. *J. Am. Chem. Soc.* **121**, 8499–8511 (1999).
6. R. E. Moore, G. Bartolini, Structure of palytoxin. *J. Am. Chem. Soc.* **103**, 2491–2494 (1981).
7. M. Murata, H. Naoki, T. Iwashita, S. Matsunaga, M. Sasaki, A. Yokoyama, T. Yasumoto, Structure of maitotoxin. *J. Am. Chem. Soc.* **115**, 2060–2062 (1993).
8. K. Nakanishi, The chemistry of brevetoxins: A review. *Toxicon* **23**, 473–479 (1985).
9. I. Vilotijevic, T. F. Jamison, Epoxide-Opening Cascades Promoted by Water. *Science* **317**, 1189–1192 (2007).
10. A. Nivina, K. P. Yuet, J. Hsu, C. Khosla, Evolution and Diversity of Assembly-Line Polyketide Synthases. *Chem. Rev.* **119**, 12524–12547 (2019).
11. K. Anestis, G. S. Kohli, S. Wohlrab, E. Varga, T. O. Larsen, P. J. Hansen, U. John, Polyketide synthase genes and molecular trade-offs in the ichthyotoxic species *Prymnesium parvum*. *Sci. Total Environ.* **795**, 148878 (2021).
12. F. M. V. Dolah, J. S. Morey, S. Milne, A. Ung, P. E. Anderson, M. Chinain, Transcriptomic analysis of polyketide synthases in a highly ciguatoxic dinoflagellate, *Gambierdiscus polynesiensis* and low toxicity *Gambierdiscus pacificus*, from French Polynesia. *PLOS ONE* **15**, e0231400 (2020).
13. N. Heimerl, E. Hommel, M. Westermann, D. Meichsner, M. Lohr, C. Hertweck, A. R. Grossman, M. Mittag, S. Sasso, A giant type I polyketide synthase participates in zygospore maturation in *Chlamydomonas reinhardtii*. *Plant J.* **95**, 268–281 (2018).
14. M. H. Medema, T. de Rond, B. S. Moore, Mining genomes to illuminate the specialized chemistry of life. *Nat. Rev. Genet.* **22**, 553–571 (2021).
15. M.-L. Bang, T. Centner, F. Fornoff, A. J. Geach, M. Gotthardt, M. McNabb, C. C. Witt, D. Labeit, C. C. Gregorio, H. Granzier, S. Labeit, The Complete Gene Sequence of Titin, Expression of an Unusual ≈700-kDa Titin Isoform, and Its Interaction With Obscurin Identify a Novel Z-Line to I-Band Linking System. *Circ. Res.* **89**, 1065–1072 (2001).
16. M. Sasaki, N. Takeda, H. Fuwa, R. Watanabe, M. Satake, Y. Oshima, Synthesis of the JK/LM-ring model of prymnesins, potent hemolytic and ichthyotoxic polycyclic ethers isolated from the red tide alga

- Prymnesium parvum*: confirmation of the relative configuration of the K/L-ring juncture. *Tetrahedron Lett.* **47**, 5687–5691 (2006).
17. T. Hashimoto, J. Hashimoto, I. Kozono, K. Amagai, T. Kawahara, S. Takahashi, H. Ikeda, K. Shin-ya, Biosynthesis of Quinolidomycin, the Largest Known Macrolide of Terrestrial Origin: Identification and Heterologous Expression of a Biosynthetic Gene Cluster over 200 kb. *Org. Lett.* **20**, 7996–7999 (2018).
  18. S. Donadio, M. Staver, J. McAlpine, S. Swanson, L. Katz, Modular organization of genes required for complex polyketide biosynthesis. *Science* **252**, 675–679 (1991).
  19. S. B. Binzer, D. K. Svendsen, N. Daugbjerg, C. Alves-de-Souza, E. Pinto, P. J. Hansen, T. O. Larsen, E. Varga, A-, B- and C-type prymnesins are clade specific compounds and chemotaxonomic markers in *Prymnesium parvum*. *Harmful Algae* **81**, 10–17 (2019).
  20. J. H. Wisecaver, R. P. Auber, A. L. Pendleton, N. F. Watervoort, T. R. Fallon, O. L. Riedling, S. R. Manning, B. S. Moore, W. W. Driscoll, Extreme genome diversity and cryptic speciation in a harmful algal bloom-forming eukaryote. *Curr. Biol.* **33**, 2246–2259.e8 (2023).
  21. J. H. Wisecaver, J. D. Hackett, Dinoflagellate Genome Evolution. *Annu. Rev. Microbiol.* **65**, 369–387 (2011).
  22. H.-H. Hong, H.-G. Lee, J. Jo, H. M. Kim, S.-M. Kim, J. Y. Park, C. B. Jeon, H.-S. Kang, M. G. Park, C. Park, K. Y. Kim, H.-H. Hong, H.-G. Lee, J. Jo, H. M. Kim, S.-M. Kim, J. Y. Park, C. B. Jeon, H.-S. Kang, M. G. Park, C. Park, K. Y. Kim, The exceptionally large genome of the harmful red tide dinoflagellate *Cochlodinium polykrikoides* Margalef (Dinophyceae): determination by flow cytometry. *Algae* **31**, 373–378 (2016).
  23. National Center for Biotechnology Information (NCBI), Sequence Read Archive (SRA), *Prymnesium parvum* strain 12B Illumina reads - SRA PRJNA201451, SRR1685644. <https://www.ncbi.nlm.nih.gov/sra/?term=SRR1685644>.
  24. Y. Dou, Y. Liu, X. Yi, L. K. Olsen, H. Zhu, Q. Gao, H. Zhou, B. Zhang, SEPeQuant enhances the detection of possible isoform regulations in shotgun proteomics. *Nat. Commun.* **14**, 5809 (2023).
  25. P. Jones, D. Binns, H.-Y. Chang, M. Fraser, W. Li, C. McAnulla, H. McWilliam, J. Maslen, A. Mitchell, G. Nuka, S. Pesseat, A. F. Quinn, A. Sangrador-Vegas, M. Scheremetjew, S.-Y. Yong, R. Lopez, S. Hunter, InterProScan 5: genome-scale protein function classification. *Bioinformatics* **30**, 1236–1240 (2014).
  26. F. Hemmerling, K. E. Lebe, J. Wunderlich, F. Hahn, An Unusual Fatty Acyl:Adenylate Ligase (FAAL)–Acyl Carrier Protein (ACP) Didomain in Ambruticin Biosynthesis. *ChemBioChem* **19**, 1006–1011 (2018).
  27. F. Hemmerling, R. A. Meoded, A. E. Fraley, H. A. Minas, C. L. Dieterich, M. Rust, R. Ueoka, K. Jensen, E. J. N. Helfrich, C. Bergande, M. Biedermann, N. Magnus, B. Piechulla, J. Piel, Modular Halogenation,  $\alpha$ -Hydroxylation, and Acylation by a Remarkably Versatile Polyketide Synthase. *Angew. Chem. Int. Ed.* **61**, e202116614 (2022).
  28. A. J. Winter, R. N. Khanizeman, A. M. C. Barker-Mountford, A. J. Devine, L. Wang, Z. Song, J. A. Davies, P. R. Race, C. Williams, T. J. Simpson, C. L. Willis, M. P. Crump, Structure and Function of the  $\alpha$ -Hydroxylation Bimodule of the Mupirocin Polyketide Synthase. *Angew. Chem. Int. Ed.* **62**, e202312514 (2023).
  29. E. J. N. Helfrich, J. Piel, Biosynthesis of polyketides by trans-AT polyketide synthases. *Nat. Prod. Rep.* **33**, 231–316 (2016).

30. D. T. Wagner, J. Zeng, C. B. Bailey, D. C. Gay, F. Yuan, H. R. Manion, A. T. Keatinge-Clay, Structural and Functional Trends in Dehydrating Bimodules from trans-Acyltransferase Polyketide Synthases. *Structure* **25**, 1045-1055.e2 (2017).
31. J. Masschelein, P. K. Sydor, C. Hobson, R. Howe, C. Jones, D. M. Roberts, Z. Ling Yap, J. Parkhill, E. Mahenthiralingam, G. L. Challis, A dual transacylation mechanism for polyketide synthase chain release in enacyloxin antibiotic biosynthesis. *Nat. Chem.* **11**, 906–912 (2019).
32. E. J. N. Helfrich, R. Ueoka, A. Dolev, M. Rust, R. A. Meoded, A. Bhushan, G. Califano, R. Costa, M. Gugger, C. Steinbeck, P. Moreno, J. Piel, Automated structure prediction of trans-acyltransferase polyketide synthase products. *Nat. Chem. Biol.* **15**, 813–821 (2019).
33. F. Taft, M. Brünjes, T. Knobloch, H. G. Floss, A. Kirschning, Timing of the  $\Delta_{10,12}$ - $\Delta_{11,13}$  Double Bond Migration During Ansamitocin Biosynthesis in *Actinosynnema pretiosum*. *J. Am. Chem. Soc.* **131**, 3812–3813 (2009).
34. G. Hibi, T. Shiraishi, T. Umemura, K. Nemoto, Y. Ogura, M. Nishiyama, T. Kuzuyama, Discovery of type II polyketide synthase-like enzymes for the biosynthesis of cispentacin. *Nat. Commun.* **14**, 8065 (2023).
35. L. Gu, B. Wang, A. Kulkarni, J. J. Gehret, K. R. Lloyd, L. Gerwick, W. H. Gerwick, P. Wipf, K. Håkansson, J. L. Smith, D. H. Sherman, Polyketide Decarboxylative Chain Termination Preceded by O-Sulfonation in Curacin A Biosynthesis. *J. Am. Chem. Soc.* **131**, 16033–16035 (2009).
36. Y. Jiang, A. Kim, C. Olive, J. C. Lewis, Selective C-H Halogenation of Alkenes and Alkynes Using Flavin-Dependent Halogenases. ChemRxiv [Preprint] (2023). <https://doi.org/10.26434/chemrxiv-2023-23r4l>.
37. T. Hua, D. Wu, W. Ding, J. Wang, N. Shaw, Z.-J. Liu, Studies of Human 2,4-Dienoyl CoA Reductase Shed New Light on Peroxisomal  $\beta$ -Oxidation of Unsaturated Fatty Acids. *J. Biol. Chem.* **287**, 28956–28965 (2012).
38. Yong-Yeng Lin, Martin Risk, Sammy M. Ray, Donna Van Engen, Jon Clardy, Jerzy Golik, John C. James, Koji Nakanishi, Isolation and structure of brevetoxin B from the “red tide” dinoflagellate *Ptychodiscus brevis* (*Gymnodinium breve*). *J. Am. Chem. Soc.* **103**, 6773–6775 (1981).
39. Z.-P. Jiang, S.-H. Sun, Y. Yu, A. Mándi, J.-Y. Luo, M.-H. Yang, T. Kurtán, W.-H. Chen, L. Shen, J. Wu, Discovery of benthol A and its challenging stereochemical assignment: opening up a new window for skeletal diversity of super-carbon-chain compounds. *Chem. Sci.* **12**, 10197–10206 (2021).
40. J. Cortes, P. Schöffski, B. A. Littlefield, Multiple modes of action of eribulin mesylate: Emerging data and clinical implications. *Cancer Treat. Rev.* **70**, 190–198 (2018).
41. F. M. V. Dolah, G. S. Kohli, J. S. Morey, S. A. Murray, Both modular and single-domain Type I polyketide synthases are expressed in the brevetoxin-producing dinoflagellate, *Karenia brevis* (Dinophyceae). *J. Phycol.* **53**, 1325–1339 (2017).
42. J. Jian, Z. Wu, A. Silva-Núñez, X. Li, X. Zheng, B. Luo, Y. Liu, X. Fang, C. T. Workman, T. O. Larsen, P. J. Hansen, E. C. Sonnenschein, Long-read genome sequencing provides novel insights into the harmful algal bloom species *Prymnesium parvum*. *Sci. Total Environ.*, 168042 (2023).
43. R. M. Van Wagoner, M. Satake, J. L. C. Wright, Polyketide biosynthesis in dinoflagellates: what makes it different? *Nat. Prod. Rep.*, 37 (2014).
44. R. Teufel, A. Miyanaga, Q. Michaudel, F. Stull, G. Louie, J. P. Noel, P. S. Baran, B. Palfey, B. S. Moore, Flavin-mediated dual oxidation controls an enzymatic Favorskii-type rearrangement. *Nature* **503**, 552–556 (2013).



45. S. Guo, Y. Sang, C. Zheng, X.-S. Xue, Z. Tang, W. Liu, Enzymatic  $\alpha$ -Ketothioester Decarbonylation Occurs in the Assembly Line of Barbamide for Skeleton Editing. *J. Am. Chem. Soc.* **145**, 5017–5028 (2023).
46. J. K. Brunson, S. M. K. McKinnie, J. R. Chekan, J. P. McCrow, Z. D. Miles, E. M. Bertrand, V. A. Bielinski, H. Luhavaya, M. Oborník, G. J. Smith, D. A. Hutchins, A. E. Allen, B. S. Moore, Biosynthesis of the neurotoxin domoic acid in a bloom-forming diatom. *Science* **361**, 1356–1358 (2018).
47. Y. Perez-Riverol, J. Bai, C. Bandla, D. García-Seisdedos, S. Hewapathirana, S. Kamatchinathan, D. J. Kundu, A. Prakash, A. Frericks-Zipper, M. Eisenacher, M. Walzer, S. Wang, A. Brazma, J. A. Vizcaíno, The PRIDE database resources in 2022: a hub for mass spectrometry-based proteomics evidences. *Nucleic Acids Res.* **50**, D543–D552 (2022).
48. W. W. Driscoll, N. J. Espinosa, O. T. Eldakar, J. D. Hackett, ALLELOPATHY AS AN EMERGENT, EXPLOITABLE PUBLIC GOOD IN THE BLOOM-FORMING MICROALGA *PRYMNESIUM PARVUM*. *Evolution* **67**, 1582–1590 (2013).
49. R. R. L. Guillard, P. E. Hargraves, *Stichochrysis immobilis* is a diatom, not a chrysophyte. *Phycologia* **32**, 234–236 (1993).
50. F. J. Sedlazeck, P. Rescheneder, M. Smolka, H. Fang, M. Nattestad, A. von Haeseler, M. C. Schatz, Accurate detection of complex structural variations using single-molecule sequencing. *Nat. Methods* **15**, 461–468 (2018).
51. J. T. Robinson, H. Thorvaldsdóttir, W. Winckler, M. Guttman, E. S. Lander, G. Getz, J. P. Mesirov, Integrative genomics viewer. *Nat. Biotechnol.* **29**, 24–26 (2011).
52. A. R. Quinlan, I. M. Hall, BEDTools: a flexible suite of utilities for comparing genomic features. *Bioinformatics* **26**, 841–842 (2010).
53. R. Pracana, A. Priyam, I. Levantis, R. A. Nichols, Y. Wurm, The fire ant social chromosome supergene variant Sb shows low diversity but high divergence from SB. *Mol. Ecol.* **26**, 2864–2879 (2017).
54. W. J. Kent, BLAT—The BLAST-Like Alignment Tool. *Genome Res.* **12**, 656–664 (2002).
55. O. Tange, GNU Parallel 20230522 ('Charles'), Zenodo (2023); <https://doi.org/10.5281/zenodo.7958356>.
56. G. Gremme, S. Steinbiss, S. Kurtz, GenomeTools: A Comprehensive Software Library for Efficient Processing of Structured Genome Annotations. *IEEE/ACM Trans. Comput. Biol. Bioinform.* **10**, 645–656 (2013).
57. P. Di Tommaso, M. Chatzou, E. W. Floden, P. P. Barja, E. Palumbo, C. Notredame, Nextflow enables reproducible computational workflows. *Nat. Biotechnol.* **35**, 316–319 (2017).
58. T. Lassmann, O. Frings, E. L. L. Sonnhammer, Kalign2: high-performance multiple alignment of protein and nucleotide sequences allowing external features. *Nucleic Acids Res.* **37**, 858–865 (2009).
59. N. P. Brown, C. Leroy, C. Sander, MView: a web-compatible database search or multiple alignment viewer. *Bioinformatics* **14**, 380–381 (1998).
60. Zymo Research, RNA Clean & Concentrator -25 Protocol. [https://files.zymoresearch.com/protocols/\\_r1017\\_r1018\\_rna\\_clean\\_concentrator-25.pdf](https://files.zymoresearch.com/protocols/_r1017_r1018_rna_clean_concentrator-25.pdf).
61. A. M. Bolger, M. Lohse, B. Usadel, Trimmomatic: a flexible trimmer for Illumina sequence data. *Bioinformatics*, 1–7 (2014).

62. D. Kim, J. M. Paggi, C. Park, C. Bennett, S. L. Salzberg, Graph-based genome alignment and genotyping with HISAT2 and HISAT-genotype. *Nat. Biotechnol.* **37**, 907–915 (2019).
63. M. Pertea, G. M. Pertea, C. M. Antonescu, T.-C. Chang, J. T. Mendell, S. L. Salzberg, StringTie enables improved reconstruction of a transcriptome from RNA-seq reads. *Nat. Biotechnol.* **33**, 290–295 (2015).
64. C. Camacho, G. Coulouris, V. Avagyan, N. Ma, J. Papadopoulos, K. Bealer, T. L. Madden, BLAST+: architecture and applications. *BMC Bioinformatics* **10**, 421 (2009).
65. J. M. Palmer, J. Stajich, Funannotate v1.8.1: Eukaryotic genome annotation, Zenodo (2020); <https://doi.org/10.5281/zenodo.4054262>.
66. G. S. C. Slater, E. Birney, Automated generation of heuristics for biological sequence comparison. *BMC Bioinformatics* **6**, 31 (2005).
67. R. Craig, R. C. Beavis, TANDEM: matching proteins with tandem mass spectra. *Bioinformatics* **20**, 1466–1467 (2004).
68. J. K. Eng, T. A. Jahan, M. R. Hoopmann, Comet: An open-source MS/MS sequence database search tool. *PROTEOMICS* **13**, 22–24 (2013).
69. H. Barsnes, M. Vaudel, SearchGUI: A Highly Adaptable Common Interface for Proteomics Search and de Novo Engines. *J. Proteome Res.* **17**, 2552–2555 (2018).
70. J. E. Elias, S. P. Gygi, “Target-Decoy Search Strategy for Mass Spectrometry-Based Proteomics” in *Proteome Bioinformatics*, S. J. Hubbard, A. R. Jones, Eds. (Humana Press, Totowa, NJ, 2010; [https://doi.org/10.1007/978-1-60761-444-9\\_5](https://doi.org/10.1007/978-1-60761-444-9_5)) *Methods in Molecular Biology*<sup>TM</sup>, pp. 55–71.
71. W. Shen, S. Le, Y. Li, F. Hu, SeqKit: A Cross-Platform and Ultrafast Toolkit for FASTA/Q File Manipulation. *PLOS ONE* **11**, e0163962 (2016).
72. M. Vaudel, J. M. Burkhardt, R. P. Zahedi, E. Oveland, F. S. Berven, A. Sickmann, L. Martens, H. Barsnes, PeptideShaker enables reanalysis of MS-derived proteomics data sets. *Nat. Biotechnol.* **33**, 22–24 (2015).
73. D. W. Powell, C. M. Weaver, J. L. Jennings, K. J. McAfee, Y. He, P. A. Weil, A. J. Link, Cluster Analysis of Mass Spectrometry Data Reveals a Novel Component of SAGA. *Mol. Cell. Biol.* **24**, 7249–7259 (2004).
74. G. M. Kurtzer, cclerget, M. Bauer, I. Kaneshiro, D. Trudgian, D. Godlove, hpcng/singularity: Singularity, Zenodo (2021); <https://doi.org/10.5281/zenodo.4667718>.
75. G. M. Kurtzer, V. Sochat, M. W. Bauer, Singularity: Scientific containers for mobility of compute. *PLOS ONE* **12**, e0177459 (2017).
76. T. R. Fallon, photocyte/interproscan\_parallel: v1.0.0, Zenodo (2023); <https://doi.org/10.5281/zenodo.8432691>.
77. V. Zulkower, S. Rosser, DNA Features Viewer: a sequence annotation formatting and plotting library for Python. *Bioinformatics* **36**, 4350–4352 (2020).
78. M. C. Kim, J. M. Winter, R. Cullum, A. J. Smith, W. Fenical, Expanding the Utility of Bioinformatic Data for the Full Stereostructural Assignments of Marinolides A and B, 24- and 26-Membered Macrolactones Produced by a Chemically Exceptional Marine-Derived Bacterium. *Mar. Drugs* **21**, 367 (2023).

79. K. D. Bauman, V. V. Shende, P. Y.-T. Chen, D. B. B. Trivella, T. A. M. Gulder, S. Vellalath, D. Romo, B. S. Moore, Enzymatic assembly of the salinosporamide  $\gamma$ -lactam- $\beta$ -lactone anticancer warhead. *Nat. Chem. Biol.*, 1–9 (2022).
80. D. Khare, W. A. Hale, A. Tripathi, L. Gu, D. H. Sherman, W. H. Gerwick, K. Håkansson, J. L. Smith, Structural Basis for Cyclopropanation by a Unique Enoyl-Acyl Carrier Protein Reductase. *Structure* **23**, 2213–2223 (2015).
81. J. Jumper, R. Evans, A. Pritzel, T. Green, M. Figurnov, O. Ronneberger, K. Tunyasuvunakool, R. Bates, A. Židek, A. Potapenko, A. Bridgland, C. Meyer, S. A. A. Kohl, A. J. Ballard, A. Cowie, B. Romera-Paredes, S. Nikolov, R. Jain, J. Adler, T. Back, S. Petersen, D. Reiman, E. Clancy, M. Zielinski, M. Steinegger, M. Pacholska, T. Berghammer, S. Bodenstein, D. Silver, O. Vinyals, A. W. Senior, K. Kavukcuoglu, P. Kohli, D. Hassabis, Highly accurate protein structure prediction with AlphaFold. *Nature*, 1–11 (2021).
82. M. Mirdita, K. Schütze, Y. Moriwaki, L. Heo, S. Ovchinnikov, M. Steinegger, ColabFold: making protein folding accessible to all. *Nat. Methods* **19**, 679–682 (2022).
83. M. van Kempen, S. S. Kim, C. Tumescheit, M. Mirdita, J. Lee, C. L. M. Gilchrist, J. Söding, M. Steinegger, Fast and accurate protein structure search with Foldseek. *Nat. Biotechnol.*, 1–4 (2023).
84. F. M. Ferroni, C. Tolmie, M. S. Smit, D. J. Opperman, Structural and Catalytic Characterization of a Fungal Baeyer-Villiger Monooxygenase. *PLOS ONE* **11**, e0160186 (2016).
85. C. R. Nicoll, G. Bailleul, F. Fiorentini, M. L. Mascotti, M. W. Fraaije, A. Mattevi, Ancestral-sequence reconstruction unveils the structural basis of function in mammalian FMOs. *Nat. Struct. Mol. Biol.* **27**, 14–24 (2020).
86. R. Al-Dhelaan, P. S. Russo, S. E. Padden, A. Amaya, D. W. Dong, Y.-O. You, Condensation-Incompetent Ketosynthase Inhibits trans-Acyltransferase Activity. *ACS Chem. Biol.* **14**, 304–312 (2019).
87. J. Masschelein, P. K. Sydor, C. Hobson, R. Howe, C. Jones, D. M. Roberts, Z. L. Yap, J. Parkhill, E. Mahenthiralingam, G. L. Challis, A dual transacylation mechanism for polyketide synthase chain release in enacyloxin antibiotic biosynthesis. *Nat. Chem.* **11**, 906–912 (2019).
88. S. Smith, S.-C. Tsai, The type I fatty acid and polyketide synthases: a tale of two megasynthases. *Nat. Prod. Rep.* **24**, 1041–1072 (2007).
89. J. Zheng, A. T. Keatinge-Clay, The status of type I polyketide synthase ketoreductases. *MedChemComm* **4**, 34–40 (2013).
90. T. M. McCullough, A. Dhar, D. L. Akey, J. R. Konwerski, D. H. Sherman, J. L. Smith, Structure of a modular polyketide synthase reducing region. *Structure* **31**, 1109–1120.e3 (2023).
91. C. Pockrandt, M. Alzamel, C. S. Iliopoulos, K. Reinert, GenMap: ultra-fast computation of genome mappability. *Bioinformatics* **36**, 3687–3692 (2020).
92. A. M. Kozlov, D. Darriba, T. Flouri, B. Morel, A. Stamatakis, RAxML-NG: a fast, scalable and user-friendly tool for maximum likelihood phylogenetic inference. *Bioinformatics* **35**, 4453–4455 (2019).
93. J. Huerta-Cepas, F. Serra, P. Bork, ETE 3: Reconstruction, Analysis, and Visualization of Phylogenomic Data. *Mol. Biol. Evol.* **33**, 1635–1638 (2016).
94. Z. Yin, J. S. Dickschat, Cis double bond formation in polyketide biosynthesis. *Nat. Prod. Rep.* **38**, 1445–1468 (2021).
